# Supplementary material for: Functionally heterogeneous human satellite cells identified by single cell RNA sequencing
Source: PubMed Central journal article supplement (PMC7164960; doi:10.7554/elife.51576), 2020-04-01
Supplement: elife-51576-fig2-data1.pdf [file elife-51576-fig2-data1.pdf]

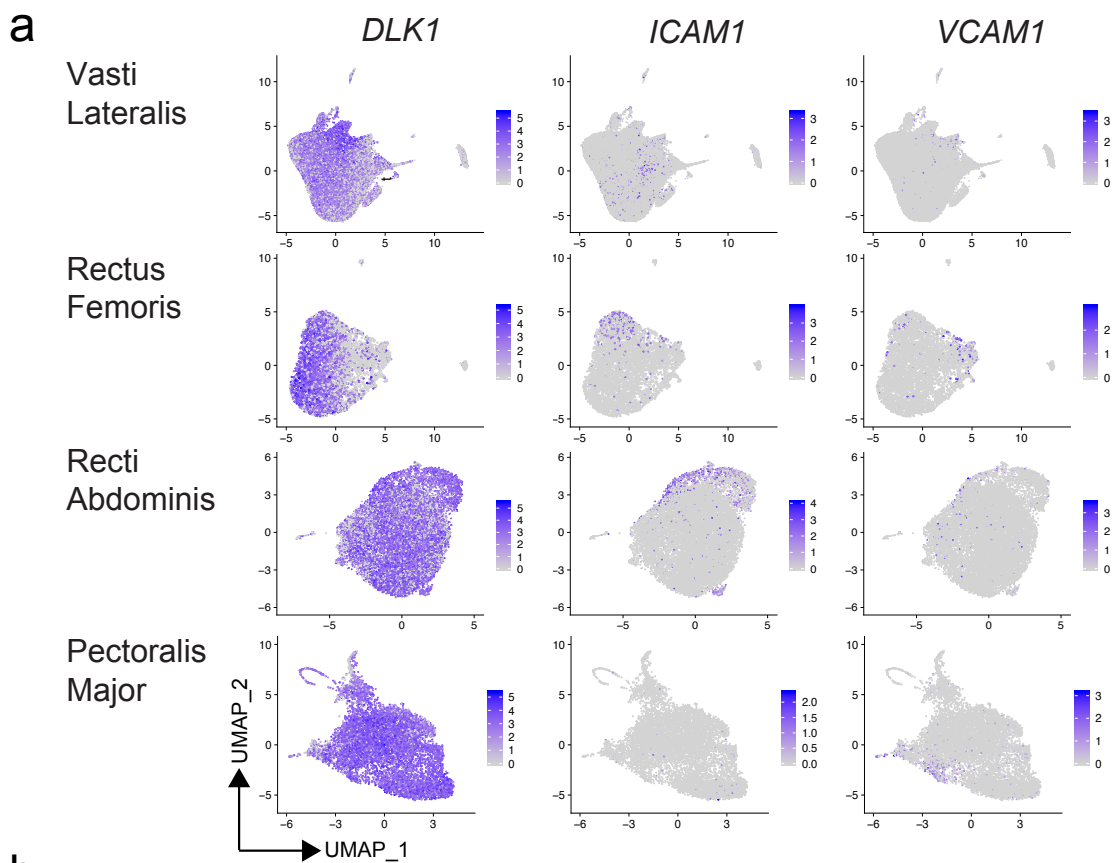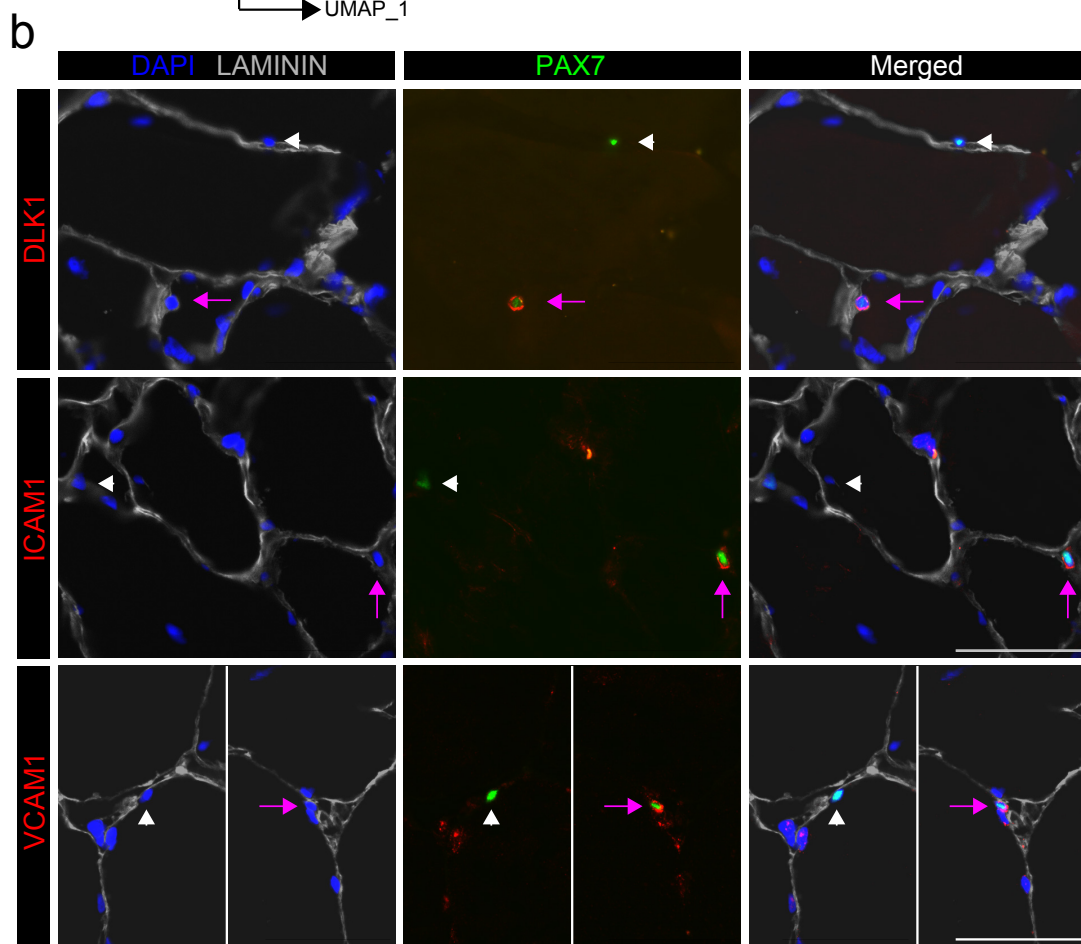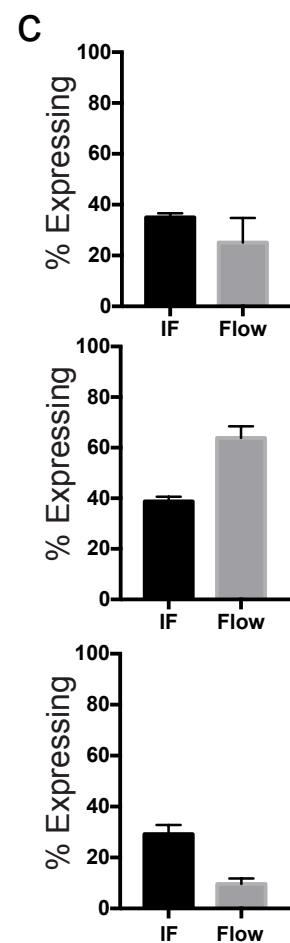

**Figure 2**
