# Supplementary material for: Functionally heterogeneous human satellite cells identified by single cell RNA sequencing
Source: eLife journal article supplement (doi:10.7554/elife.51576), 2020-04-01
Supplement: supp [file elife_poa_e51576_Figure_1_figure_supplement_1.pdf › elife_poa_e51576_Figure_1_figure_supplement_1.pdf]

a

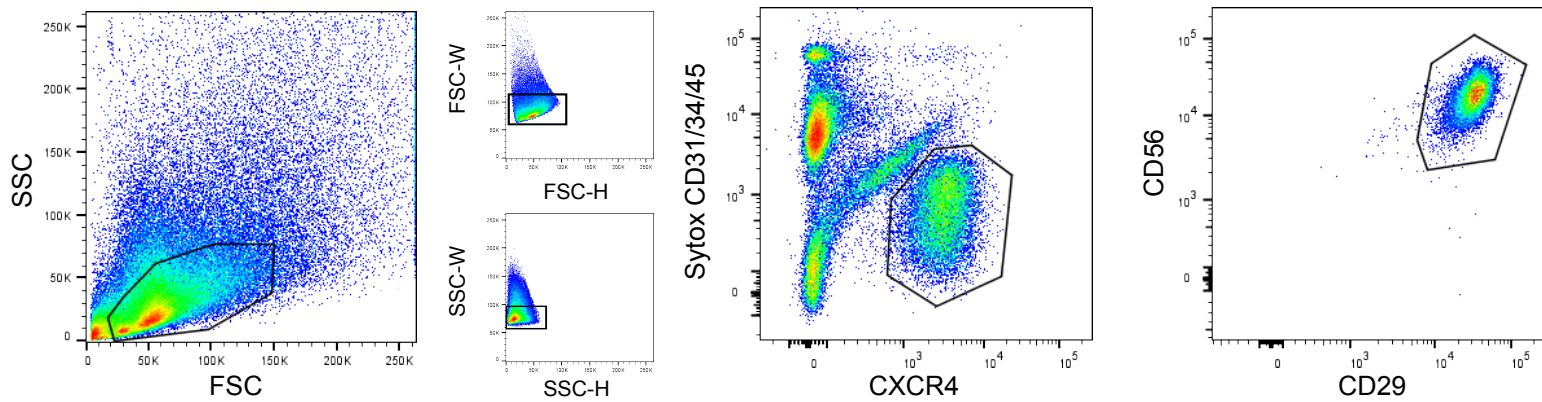

b

| Muscle type                                    | Vastus Lateralis  |
|------------------------------------------------|-------------------|-------------------|-------------------|-------------------|-------------------|-------------------|-------------------|
| Age                                            | 20                | 52                | 55                | 57                | 66                | 73                | 83                |
| Gender                                         | Male              | Male              | Male              | Female            | Male              | Male              | Male              |
| Estimated Number of Cells                      | 5,206             | 19,993            | 9,847             | 16,881            | 3,913             | 4,412             | 4,833             |
| Mean Reads per Cell                            | 166,925           | 25,282            | 48,811            | 25,571            | 121,205           | 126,458           | 72,503            |
| Median Genes per Cell                          | 2,588             | 2,210             | 1,992             | 2,205             | 2,893             | 2,237             | 2,455             |
| Number of Reads                                | 869,015,400       | 505,478,607       | 480,649,768       | 431,670,025       | 474,277,345       | 557,935,468       | 350,410,552       |
| Valid Barcodes                                 | 97.4%             | 97.5%             | 97.4%             | 97.2%             | 97.9%             | 97.3%             | 97.5%             |
| Reads Mapped Confidently to Transcriptome      | 65.1%             | 68.3%             | 72.7%             | 70.1%             | 68.8%             | 67.3%             | 61.1%             |
| Reads Mapped Confidently to Exonic Regions     | 68.5%             | 72.1%             | 76.6%             | 74.1%             | 72.6%             | 71.0%             | 64.7%             |
| Reads Mapped Confidently to Intronic Regions   | 17.1%             | 13.6%             | 9.9%              | 13.0%             | 14.7%             | 12.7%             | 19.9%             |
| Reads Mapped Confidently to Intergenic Regions | 8.5%              | 8.2%              | 7.5%              | 7.0%              | 7.5%              | 9.2%              | 9.3%              |
| Sequencing Saturation                          | 83.6%             | 53.4%             | 79.3%             | 57.0%             | 74.6%             | 83.2%             | 68.9%             |
| Fraction Reads in Cells                        | 85.9%             | 92.2%             | 93.6%             | 92.6%             | 84.3%             | 79.9%             | 88.3%             |
| Median UMI Counts per Cell                     | 8,233             | 6,530             | 5,970             | 6,382%            | 8,822             | 6,922             | 7,946%            |
| Transcriptome                                  | GRCh38            |
| Chemistry                                      | Single Cell 3' v3 |

c

| Muscle type                                    | Rectus Abdominis  | Rectus Abdominis  | Pectoralis Major  | Pectoralis Major  | Rectus Femoris    | Vastus Lateralis  |
|------------------------------------------------|-------------------|-------------------|-------------------|-------------------|-------------------|-------------------|
| Age                                            | 56                | 59                | 21                | 40                | 84                | 56                |
| Gender                                         | Female            | Female            | Female            | Female            | Male              | Male              |
| Estimated Number of Cells                      | 20,868            | 2,369             | 2,394             | 6,897             | 5,062             | 7,618             |
| Mean Reads per Cell                            | 33,641            | 315,081           | 244,085           | 68,486            | 29,570            | 19,050            |
| Median Genes per Cell                          | 539               | 2,266             | 2,378             | 2,535             | 780               | 852               |
| Number of Reads                                | 702,030,725       | 746,429,103       | 584,340,194       | 479,249,662       | 149,686,461       | 145,126,217       |
| Valid Barcodes                                 | 97.1%             | 96.8%             | 97.7%             | 97.1%             | 92.90%            | 88.50%            |
| Reads Mapped Confidently to Transcriptome      | 41.5%             | 52.9%             | 65.7%             | 73.5%             | 64.60%            | 63.70%            |
| Reads Mapped Confidently to Exonic Regions     | 45.6%             | 57.3%             | 69.9%             | 61.5%             | 68.00%            | 67.30%            |
| Reads Mapped Confidently to Intronic Regions   | 38.8%             | 29.2%             | 17.2%             | 65.9%             | 12.80%            | 12.40%            |
| Reads Mapped Confidently to Intergenic Regions | 8.9%              | 6.2%              | 7.3%              | 21.9%             | 8.10%             | 7.00%             |
| Sequencing Saturation                          | 92.0%             | 92.3%             | 94.2%             | 73.5%             | 87.20             | 72.90%            |
| Fraction Reads in Cells                        | 95.8%             | 93.7%             | 95.6%             | 90.7%             | 96.30             | 94.00%            |
| Median UMI Counts per Cell                     | 819               | 6,981             | 7,289%            | 7,389             | 1,753             | 2,297             |
| Transcriptome                                  | GRCh38            | GRCh38            | GRCh38            | GRCh38            | hg19              | hg19              |
| Chemistry                                      | Single Cell 3' v3 | Single Cell 3' v1 | Single Cell 3' v1 |

Figure 1-figure supplement 1
