# Supplementary material for: Functionally heterogeneous human satellite cells identified by single cell RNA sequencing
Source: eLife. 2020 Apr 1;9:e51576. doi: 10.7554/eLife.51576 (PMC7164960; doi:10.7554/eLife.51576)
Supplement: Supplementary file 1. [file elife-51576-supp1.xlsx]

## Sheet: Cluster 0
gene	p_val	avg_logFC	pct.1	pct.2	p_val_adj	cluster
DLK1	0	0.270389	0.889	0.806	0	0
GNAS	0	0.267039	0.982	0.95	0	0
CHRDL2	0	0.253797	0.788	0.666	0	0
CITED4	0	0.251953	0.642	0.514	0	0

## Sheet: Cluster 1
gene	p_val	avg_logFC	pct.1	pct.2	p_val_adj	cluster
DNAJA1	0	0.956116	0.96	0.716	0	1
ATF3	0	0.824743	0.883	0.537	0	1
UBE2S	0	0.803018	0.74	0.397	0	1
KLF4	0	0.777626	0.905	0.607	0	1
FOSB	0	0.774979	0.997	0.924	0	1
ID1	0	0.772459	0.881	0.578	0	1
ID3	0	0.731813	0.852	0.576	0	1
SERTAD1	0	0.717446	0.897	0.567	0	1
DNAJB1	0	0.714288	0.949	0.725	0	1
GADD45B	0	0.712313	0.952	0.749	0	1
JUND	0	0.688972	0.957	0.913	0	1
MAFF	0	0.680744	0.751	0.431	0	1
EGR1	0	0.673281	0.978	0.853	0	1
SOCS3	0	0.671664	0.82	0.553	0	1
HSP90AA1	0	0.66397	0.996	0.96	0	1
JUNB	0	0.614976	1	0.973	0	1
IRF1	0	0.60613	0.681	0.395	0	1
IER3	0	0.604368	0.663	0.467	0	1
CTD-3252C9.4	0	0.602933	0.584	0.295	0	1
IER2	0	0.601072	0.984	0.879	0	1
KLF2	0	0.593657	0.913	0.779	0	1
PPP1R15A	0	0.574645	0.913	0.715	0	1
ADM	0	0.566844	0.626	0.364	0	1
BRD2	0	0.565964	0.808	0.558	0	1
H2AFZ	0	0.537257	0.845	0.657	0	1
H2AFX	0	0.533357	0.648	0.351	0	1
CCNL1	0	0.531807	0.94	0.779	0	1
CEBPB	0	0.526709	0.954	0.837	0	1
HSPA1A	0	0.523472	0.927	0.748	0	1
SRSF3	0	0.522267	0.972	0.886	0	1
TUBB4B	0	0.519141	0.826	0.613	0	1
PLK2	0	0.517933	0.514	0.242	0	1
FOS	0	0.512974	0.994	0.972	0	1
CDKN1A	0	0.510083	0.716	0.408	0	1
DDX5	0	0.504362	0.992	0.955	0	1
SNHG12	0	0.490876	0.518	0.265	0	1
IER5L	0	0.488617	0.556	0.29	0	1
EIF4A3	0	0.48012	0.714	0.488	0	1
BTG2	0	0.477458	0.933	0.781	0	1
ODC1	0	0.471485	0.632	0.447	0	1
MCL1	0	0.470777	0.786	0.557	0	1
CSRNP1	0	0.468681	0.653	0.394	0	1
ZFP36	0	0.462436	0.988	0.909	0	1
IER5	0	0.459758	0.688	0.443	0	1
HSPA1B	0	0.454176	0.846	0.635	0	1
TIPARP	0	0.454008	0.668	0.441	0	1
HSPH1	0	0.449908	0.464	0.259	0	1
PPP1R10	0	0.440656	0.753	0.553	0	1
HSPA8	0	0.440382	0.936	0.82	0	1
CYR61	0	0.43793	0.83	0.645	0	1
ID2	0	0.437667	0.559	0.351	0	1
SFPQ	0	0.43015	0.896	0.769	0	1
EIF5	0	0.421406	0.93	0.82	0	1
MYC	0	0.41559	0.871	0.721	0	1
RSRP1	0	0.414933	0.694	0.516	0	1
MYADM	0	0.41404	0.704	0.51	0	1
HERPUD1	0	0.413664	0.839	0.677	0	1
HSPA2	0	0.408454	0.512	0.297	0	1
AMD1	0	0.405968	0.688	0.478	0	1
FUS	0	0.403925	0.929	0.837	0	1
HEXIM1	0	0.403111	0.59	0.363	0	1
DDX3X	0	0.403027	0.72	0.545	0	1
HSP90AB1	0	0.399267	0.998	0.986	0	1
MAFB	0	0.397471	0.672	0.476	0	1
DDIT3	0	0.393718	0.561	0.363	0	1
NFIL3	0	0.393033	0.486	0.281	0	1
JUN	0	0.392982	0.995	0.974	0	1
NR4A1	0	0.392182	0.732	0.505	0	1
IFRD1	0	0.391643	0.715	0.504	0	1
BTG1	0	0.391239	0.994	0.969	0	1
ING1	0	0.390059	0.586	0.369	0	1
NUFIP2	0	0.388624	0.601	0.391	0	1
CDKN2AIP	0	0.38332	0.583	0.377	0	1
RBBP6	0	0.382881	0.705	0.527	0	1
ID4	0	0.371832	0.455	0.24	0	1
PCF11	0	0.364095	0.633	0.441	0	1
MIDN	0	0.360384	0.557	0.361	0	1
DNAJB4	0	0.357242	0.525	0.368	0	1
SRSF7	0	0.354549	0.923	0.833	0	1
ZFAND5	0	0.351264	0.927	0.826	0	1
SAT1	0	0.350831	0.868	0.745	0	1
MAP1LC3B	0	0.344161	0.704	0.544	0	1
CYCS	0	0.339665	0.673	0.518	0	1
CHD1	0	0.337099	0.55	0.364	0	1
RND3	0	0.333962	0.712	0.557	0	1
FILIP1L	0	0.333605	0.602	0.451	0	1
UBC	0	0.330984	0.998	0.988	0	1
MARCKSL1	0	0.328907	0.338	0.161	0	1
THUMPD3-AS1	0	0.328548	0.438	0.257	0	1
TOP1	0	0.326949	0.649	0.492	0	1
MLF1	0	0.324629	0.358	0.197	0	1
WEE1	0	0.323984	0.654	0.495	0	1
SKIL	0	0.3239	0.477	0.312	0	1
DYNLL1	0	0.322394	0.92	0.831	0	1
BAG3	0	0.321439	0.466	0.285	0	1
TOB1	0	0.317722	0.537	0.342	0	1
DUSP1	0	0.317681	0.984	0.943	0	1
ZFP36L1	0	0.317476	0.83	0.71	0	1
ERO1B	0	0.313283	0.317	0.146	0	1
ARL6IP1	0	0.310211	0.62	0.455	0	1
HBEGF	0	0.308593	0.307	0.135	0	1
NEU1	0	0.308418	0.458	0.309	0	1
NFKBIA	0	0.307863	0.971	0.941	0	1
SAP18	0	0.30677	0.938	0.883	0	1
EIF1	0	0.303255	1	0.999	0	1
ADAMTS1	0	0.300435	0.391	0.232	0	1
ZFAS1	0	0.296856	0.976	0.933	0	1
ADRB2	0	0.295185	0.333	0.173	0	1
GTF2B	0	0.294536	0.505	0.373	0	1
CEBPD	0	0.292889	0.993	0.978	0	1
CALM1	0	0.288173	0.912	0.815	0	1
WSB1	0	0.284482	0.762	0.632	0	1
TSPYL2	0	0.283443	0.491	0.341	0	1
TUBB2A	0	0.281473	0.684	0.539	0	1
FAM53C	0	0.277958	0.347	0.187	0	1
UBB	0	0.276398	0.971	0.929	0	1
TLE4	0	0.276051	0.782	0.651	0	1
RBM39	0	0.272058	0.941	0.868	0	1
MT1A	0	0.271684	0.644	0.488	0	1
NASP	0	0.266103	0.595	0.468	0	1
INTS6	0	0.265032	0.71	0.569	0	1
YBX3	0	0.264379	0.942	0.89	0	1
RHOB	0	0.264065	0.979	0.951	0	1
EIF4A2	0	0.260313	0.933	0.865	0	1
ZC3H12A	0	0.25901	0.259	0.112	0	1
TRA2A	9.04140131889481e-322	0.255516	0.6	0.471	1.9822368251545e-317	1
NUDT4	1.8682998525014e-317	0.283819	0.581	0.449	4.09606059662408e-313	1
NAMPT	1.77031e-300	0.258789	0.464	0.321	3.88124e-296	1
C11orf96	1.95521e-292	0.300268	0.469	0.313	4.2866e-288	1
ELL2	6.4478e-291	0.261706	0.502	0.353	1.41362e-286	1
CITED2	1.32101e-273	0.261928	0.654	0.528	2.89617e-269	1
ARID5B	3.64713e-204	0.281373	0.707	0.628	7.99597e-200	1

## Sheet: Cluster 2
gene	p_val	avg_logFC	pct.1	pct.2	p_val_adj	cluster
PLCG2	0	0.727721	0.704	0.653	0	2	PLCG2
GNAS	0	0.26995	0.962	0.96	0	2	GNAS
SPARCL1	0	0.262159	0.991	0.969	0	2	SPARCL1
APOE	9.75103e-281	0.295638	0.991	0.971	2.13782e-276	2	APOE
CXCL14	8.07976e-243	0.275036	0.98	0.952	1.77141e-238	2	CXCL14
CHRDL2	1.72644e-156	0.251453	0.748	0.698	3.78505e-152	2	CHRDL2

## Sheet: Cluster 3
gene	p_val	avg_logFC	pct.1	pct.2	p_val_adj	cluster
MT1X	7.76265e-260	0.467429	0.987	0.985	1.70188e-255	3
MT1M	8.11405e-205	0.618762	0.849	0.851	1.77892e-200	3
RP11-161M6.2	1.72374e-202	0.293899	0.291	0.202	3.77913e-198	3
DDIT4	1.21669e-182	0.287411	0.72	0.744	2.66747e-178	3
SOX8	4.78578e-166	0.290396	0.27	0.187	1.04923e-161	3
FAM13C	1.76709e-163	0.252845	0.303	0.248	3.87417e-159	3
MT1E	3.5867e-151	0.4987	0.892	0.902	7.86349e-147	3
SOX4	1.98265e-139	0.250461	0.543	0.542	4.34677e-135	3
MT2A	3.7792e-130	0.555206	0.974	0.971	8.28552e-126	3
MT1A	1.274e-122	0.445565	0.534	0.522	2.79312e-118	3
C10orf10	4.21953e-109	0.337515	0.385	0.308	9.25091e-105	3
GPX3	1.08247e-100	0.296868	0.455	0.398	2.37321e-96	3
CFD	5.46284e-96	0.300112	0.375	0.34	1.19767e-91	3

## Sheet: Cluster 4
gene	p_val	avg_logFC	pct.1	pct.2	p_val_adj	cluster
CCL2	0	1.684	0.626	0.2	0	4
SOD2	0	1.18882	0.797	0.629	0	4
TAGLN	0	0.946892	0.674	0.424	0	4
MGP	0	0.791794	0.729	0.539	0	4
IGFBP2	0	0.682716	0.357	0.114	0	4
IL32	0	0.670939	0.675	0.415	0	4
TYMP	0	0.604139	0.653	0.432	0	4
TIMP1	0	0.600069	0.875	0.731	0	4
TNFRSF12A	0	0.593417	0.35	0.128	0	4
TMSB10	0	0.53589	0.988	0.971	0	4
NNMT	0	0.526006	0.966	0.876	0	4
C1R	0	0.498483	0.699	0.434	0	4
S100A11	0	0.486279	0.906	0.797	0	4
RELB	0	0.391548	0.303	0.076	0	4
METTL7B	0	0.375463	0.3	0.077	0	4
CD63	0	0.311007	0.999	0.996	0	4
IFITM3	2.31157649509775e-314	0.430364	0.947	0.871	5.06790030785231e-310	4
TNFAIP2	1.81499087937719e-310	0.520309	0.57	0.378	3.97919e-306	4
NFKB2	3.24236e-305	0.364946	0.347	0.139	7.10856e-301	4
CAV1	1.81796e-266	0.463829	0.699	0.542	3.98569e-262	4
PKM	4.10693e-266	0.390509	0.742	0.608	9.00403e-262	4
PFN1	1.92882e-249	0.343685	0.857	0.772	4.22874e-245	4
ANXA2	2.35245e-249	0.338422	0.93	0.883	5.15752e-245	4
COL1A1	5.39411e-246	0.380242	0.284	0.102	1.1826e-241	4
PSME2	4.22661e-234	0.38612	0.611	0.424	9.26641e-230	4
DLK1	5.32147e-232	0.5605	0.871	0.83	1.16668e-227	4
CD44	2.08403e-228	0.375918	0.515	0.301	4.56904e-224	4
PTMS	2.21938e-224	0.313311	0.835	0.753	4.86577e-220	4
GPM6B	9.79501e-213	0.364009	0.757	0.613	2.14746e-208	4
IFITM2	1.89594e-198	0.337111	0.853	0.75	4.15666e-194	4
PLEKHA4	7.08892e-197	0.252787	0.347	0.157	1.55417e-192	4
MT2A	9.09106e-194	0.560531	0.987	0.97	1.99312e-189	4
DAG1	1.89217e-186	0.335586	0.784	0.693	4.14839e-182	4
EMP3	3.7356e-186	0.352756	0.681	0.507	8.18992e-182	4
TUBA1C	1.29017e-178	0.331766	0.406	0.223	2.82857e-174	4
COL1A2	2.87968e-176	0.370964	0.632	0.48	6.3134e-172	4
C11orf96	5.64441e-168	0.742169	0.499	0.338	1.23748e-163	4
SH3BGRL3	2.79268e-161	0.295145	0.55	0.385	6.12267e-157	4
LGALS3	1.14602e-156	0.263324	0.874	0.781	2.51254e-152	4
ENO1	5.61186e-155	0.274153	0.757	0.641	1.23035e-150	4
TUBA1B	1.33209e-149	0.276562	0.905	0.833	2.92047e-145	4
IRF1	2.4505e-148	0.439844	0.615	0.448	5.37249e-144	4
LMNA	3.1292e-140	0.269454	0.956	0.91	6.86046e-136	4
CD151	2.43147e-139	0.26747	0.73	0.608	5.33076e-135	4
TMSB4X	3.08667e-137	0.302992	0.883	0.812	6.76721e-133	4
UGCG	1.20512e-134	0.282549	0.58	0.415	2.64211e-130	4
S100A13	1.6849e-131	0.257806	0.811	0.73	3.69397e-127	4
NFKBIA	5.80619e-127	0.331862	0.971	0.946	1.27295e-122	4
CHODL	9.59142e-120	0.295502	0.36	0.22	2.10282e-115	4
GPX1	1.39906e-114	0.256131	0.726	0.621	3.0673e-110	4
IER3	5.75242e-111	0.418566	0.655	0.501	1.26116e-106	4
BIRC3	9.73049e-111	0.284602	0.319	0.191	2.13331e-106	4
DDX21	8.67845e-101	0.318052	0.713	0.601	1.90266e-96	4
REL	1.81623e-98	0.260309	0.327	0.211	3.98191e-94	4
BAZ1A	1.5621e-94	0.292323	0.323	0.207	3.42474e-90	4
WTAP	3.90288e-93	0.275195	0.584	0.457	8.55668e-89	4
MAP1LC3A	6.09983e-92	0.270155	0.569	0.464	1.33733e-87	4
NPTX2	5.00123e-89	0.288159	0.32	0.197	1.09647e-84	4
EIF4A1	1.47459e-85	0.363573	0.843	0.758	3.2329e-81	4
NAMPT	1.42488e-79	0.298949	0.44	0.347	3.12391e-75	4
S100A10	4.81084e-79	0.256782	0.922	0.898	1.05473e-74	4
FABP5	3.70673e-72	0.273739	0.372	0.254	8.12664e-68	4
FRZB	3.69743e-71	0.260862	0.34	0.232	8.10624e-67	4
CTGF	1.08685e-58	0.400225	0.503	0.401	2.38282e-54	4
MT1A	2.32247e-30	0.420811	0.576	0.52	5.09179e-26	4

## Sheet: Cluster 5
gene	p_val	avg_logFC	pct.1	pct.2	p_val_adj	cluster
TPPP3	0	1.11764	0.654	0.297	0	5
S100A10	0	1.02577	0.985	0.895	0	5
S100A3	0	0.874189	0.503	0.087	0	5
CAV1	0	0.858709	0.828	0.536	0	5
IGFBP6	0	0.832672	0.482	0.173	0	5
ANXA1	0	0.745202	0.961	0.803	0	5
S100A6	0	0.72995	1	0.996	0	5
S100A4	0	0.665548	0.995	0.97	0	5
EMP3	0	0.638344	0.778	0.504	0	5
ANXA2	0	0.623056	0.967	0.881	0	5
COL6A2	0	0.507975	0.835	0.709	0	5
CD9	0	0.501207	0.963	0.889	0	5
PKM	0	0.456386	0.771	0.607	0	5
VIM	0	0.387351	1	0.996	0	5
LGALS1	2.70251e-293	0.348408	0.996	0.976	5.92498e-289	5
LGALS3	7.64418e-277	0.400277	0.892	0.78	1.67591e-272	5
LMNA	1.3408e-267	0.393741	0.971	0.91	2.93956e-263	5
GSN	1.3189e-262	0.389911	0.828	0.705	2.89156e-258	5
MGP	1.33009e-242	0.643836	0.708	0.542	2.9161e-238	5
PTRF	3.12113e-223	0.354111	0.732	0.586	6.84276e-219	5
PLP2	4.22322e-220	0.374854	0.68	0.484	9.25898e-216	5
CAPN2	1.20881e-216	0.350454	0.639	0.464	2.65019e-212	5
COL6A1	1.70919e-212	0.375236	0.669	0.51	3.74724e-208	5
CD99	8.00181e-212	0.297282	0.897	0.826	1.75432e-207	5
DKK3	1.96098e-174	0.322072	0.283	0.138	4.29926e-170	5
HCFC1R1	1.07903e-162	0.292998	0.403	0.225	2.36567e-158	5
CD44	1.41564e-151	0.333415	0.476	0.305	3.10364e-147	5
CD82	1.10989e-147	0.299369	0.752	0.61	2.43332e-143	5
TAGLN2	2.83488e-146	0.282053	0.871	0.784	6.21519e-142	5
BTC	5.19176e-144	0.26348	0.317	0.158	1.13824e-139	5
GPX4	1.05859e-122	0.259525	0.869	0.821	2.32085e-118	5
TUBA1C	1.44118e-117	0.265076	0.384	0.226	3.15964e-113	5
COL18A1	1.62293e-115	0.266989	0.76	0.65	3.55812e-111	5
GLIPR2	1.38924e-114	0.260926	0.53	0.387	3.04577e-110	5
S100A11	1.38026e-113	0.252476	0.878	0.8	3.02607e-109	5
CLU	1.45937e-111	0.256451	0.951	0.899	3.19953e-107	5
ITIH5	1.36372e-108	0.261924	0.393	0.238	2.98981e-104	5
TMSB4X	7.37984e-107	0.352123	0.881	0.813	1.61796e-102	5
CTGF	1.34541e-101	0.489776	0.547	0.399	2.94968e-97	5
COL1A2	1.05512e-95	0.31807	0.591	0.484	2.31325e-91	5
COL3A1	3.30303e-67	0.280656	0.568	0.476	7.24156e-63	5
KLF6	1.65255e-65	0.283302	0.654	0.55	3.62304e-61	5
CLDN5	1.66152e-64	0.288208	0.447	0.362	3.64273e-60	5

## Sheet: Cluster 6
gene	p_val	avg_logFC	pct.1	pct.2	p_val_adj	cluster
ACTC1	0	1.57472	0.419	0.047	0	6
MYOG	0	1.34101	0.318	0.01	0	6
MARCKS	0	1.20732	0.801	0.344	0	6
SOX8	0	1.19601	0.79	0.18	0	6
NEU4	0	1.13898	0.549	0.069	0	6
SIRT2	0	1.12327	0.923	0.678	0	6
RP11-161M6.2	0	1.11376	0.806	0.196	0	6
CFHR1	0	1.00656	0.646	0.12	0	6
KLHL41	0	0.986642	0.923	0.572	0	6
FITM1	0	0.958466	0.794	0.345	0	6
CFH	0	0.905079	0.77	0.289	0	6
DIO2	0	0.871473	0.762	0.32	0	6
STMN1	0	0.833035	0.777	0.384	0	6
FSCN1	0	0.796727	0.744	0.259	0	6
PFN1	0	0.777991	0.959	0.773	0	6
MEST	0	0.758261	0.884	0.547	0	6
SPARC	0	0.71249	0.948	0.766	0	6
GPM6B	0	0.70233	0.923	0.615	0	6
STAC3	0	0.69201	0.921	0.646	0	6
LINC00844	0	0.643147	0.491	0.094	0	6
MYOD1	0	0.627724	0.485	0.061	0	6
PPP1R14B	0	0.597951	0.976	0.891	0	6
CHADL	0	0.488711	0.337	0.031	0	6
SHD	0	0.452468	0.331	0.025	0	6
MAP6D1	0	0.392493	0.264	0.01	0	6
CTD-2545M3.8	1.82804288961261e-321	0.659418	0.259	0.015	4.00780123118669e-317	6
SERPINF1	1.23518253656532e-310	0.655275	0.923	0.697	2.70801e-306	6
COX6A2	2.19454e-307	0.4224	0.532	0.123	4.81131e-303	6
ATP1A1	6.44303e-298	0.675885	0.773	0.422	1.41257e-293	6
PRR7	1.6349e-296	0.370238	0.313	0.033	3.58435e-292	6
GUK1	1.9067e-292	0.571173	0.913	0.731	4.18025e-288	6
SERPINB9	2.73505e-271	0.603185	0.593	0.203	5.99631e-267	6
TNFRSF18	4.10492e-265	0.445383	0.307	0.044	8.99963e-261	6
RP1-302G2.5	7.35593e-258	0.434919	0.266	0.031	1.61271e-253	6
RBP1	5.78423e-253	0.603197	0.929	0.802	1.26813e-248	6
MARCKSL1	2.04621e-251	0.58846	0.577	0.192	4.4861e-247	6
SLF2	5.52572e-248	0.506788	0.533	0.163	1.21146e-243	6
BCAM	4.9487e-245	0.623686	0.535	0.207	1.08495e-240	6
FLNC	2.09064e-243	0.526502	0.645	0.253	4.58353e-239	6
NES	1.39912e-238	0.484904	0.274	0.039	3.06742e-234	6
NACA	2.89636e-236	0.345096	0.999	0.996	6.34997e-232	6
PKIA	6.98449e-227	0.37333	0.407	0.09	1.53128e-222	6
EMC10	1.8334e-223	0.689688	0.577	0.255	4.01955e-219	6
CHRNA1	2.75219e-222	0.508454	0.939	0.731	6.03391e-218	6
GPC1	3.9629e-221	0.519706	0.678	0.309	8.68827e-217	6
MGLL	1.32914e-215	0.405431	0.406	0.095	2.91402e-211	6
CDC42EP3	2.34302e-215	0.514336	0.551	0.197	5.13684e-211	6
CCND2	2.53048e-211	0.626454	0.443	0.154	5.54782e-207	6
FGFR1	2.06109e-207	0.510602	0.704	0.349	4.51873e-203	6
OLFML2B	8.32161e-203	0.558299	0.852	0.626	1.82443e-198	6
FNDC5	4.42011e-200	0.538042	0.316	0.09	9.69065e-196	6
MEGF10	7.30485e-198	0.502006	0.648	0.302	1.60152e-193	6
ATP1B1	1.10516e-192	0.535364	0.749	0.397	2.42296e-188	6
GAPDH	1.63843e-187	0.361239	0.996	0.99	3.5921e-183	6
HMGB3	7.54475e-186	0.49539	0.47	0.15	1.65411e-181	6
CXXC5	1.42711e-182	0.510492	0.903	0.686	3.1288e-178	6
CDH15	5.60356e-177	0.488882	0.793	0.536	1.22853e-172	6
LMF1-AS1	3.60936e-174	0.310141	0.308	0.064	7.91317e-170	6
MYL6B	7.06226e-174	0.536711	0.653	0.358	1.54833e-169	6
SEPW1	2.04595e-173	0.548868	0.804	0.613	4.48554e-169	6
CCDC90B	4.03068e-173	0.454633	0.621	0.301	8.83687e-169	6
HS6ST2	8.18138e-168	0.265839	0.363	0.096	1.79369e-163	6
ANKRD10	4.64623e-167	0.539164	0.83	0.59	1.01864e-162	6
HSPG2	6.21493e-167	0.481019	0.69	0.378	1.36256e-162	6
RTKN	1.85448e-166	0.447848	0.72	0.387	4.06576e-162	6
THBS4	3.23335e-165	0.613358	0.608	0.339	7.0888e-161	6
HERC1	5.77366e-165	0.520145	0.411	0.156	1.26582e-160	6
NEB	9.02431e-165	0.354469	0.8	0.464	1.97849e-160	6
CCNG2	1.5308e-162	0.44239	0.614	0.283	3.35612e-158	6
DMPK	1.97707e-161	0.412194	0.454	0.162	4.33453e-157	6
SIX1	1.12638e-156	0.482474	0.783	0.499	2.46947e-152	6
TP53I3	1.75352e-155	0.345592	0.466	0.166	3.84441e-151	6
H3F3A	2.26063e-154	0.332858	0.959	0.894	4.95621e-150	6
MRAS	3.48657e-154	0.344598	0.476	0.173	7.64396e-150	6
TPM2	2.95118e-150	0.757287	0.8	0.593	6.47018e-146	6
DBN1	2.36412e-149	0.274627	0.316	0.078	5.18311e-145	6
NUDT14	1.33653e-148	0.433665	0.586	0.282	2.9302e-144	6
C1QTNF3	1.56448e-147	0.890657	0.527	0.36	3.42997e-143	6
PTMA	1.0721e-145	0.270824	1	0.998	2.35047e-141	6
SEMA6B	9.71246e-145	0.276152	0.263	0.055	2.12936e-140	6
ZBTB20	6.50469e-144	0.410089	0.914	0.732	1.42609e-139	6
BIN1	1.04256e-140	0.549182	0.383	0.127	2.28571e-136	6
ACTG1	4.68911e-139	0.402517	0.995	0.973	1.02804e-134	6
RRAS2	1.24271e-138	0.30906	0.429	0.153	2.72453e-134	6
COL15A1	4.55831e-137	0.441158	0.567	0.265	9.99365e-133	6
BID	1.75952e-133	0.264544	0.315	0.087	3.85757e-129	6
TCF12	1.4196e-132	0.347586	0.414	0.153	3.11233e-128	6
PPDPF	6.35319e-129	0.359741	0.928	0.749	1.39287e-124	6
VWA1	4.30269e-124	0.407417	0.806	0.544	9.43322e-120	6
SMARCD3	3.32331e-122	0.311188	0.512	0.228	7.28603e-118	6
PURB	8.8041e-121	0.368618	0.5	0.228	1.93021e-116	6
CLDN5	2.61173e-119	0.63599	0.602	0.362	5.72595e-115	6
COA4	3.57615e-110	0.344355	0.763	0.5	7.84035e-106	6
PPIA	8.50302e-110	0.293364	0.976	0.932	1.8642e-105	6
LGALS1	3.85313e-108	0.371434	0.997	0.976	8.44761e-104	6
SCRIB	5.24126e-108	0.298997	0.27	0.083	1.14909e-103	6
NREP	2.70306e-107	0.266243	0.406	0.163	5.92619e-103	6
PTMS	3.39333e-104	0.33982	0.915	0.754	7.43954e-100	6
PARP1	3.30301e-102	0.415259	0.561	0.318	7.24152e-98	6
DBI	5.10096e-102	0.351389	0.934	0.813	1.11833e-97	6
MYBPHL	3.9824e-101	0.434423	0.367	0.141	8.73101e-97	6
PLOD1	7.13041e-100	0.299091	0.613	0.339	1.56327e-95	6
LASP1	1.2886e-98	0.328174	0.607	0.34	2.82514e-94	6
C1orf122	2.05815e-98	0.309653	0.619	0.351	4.51229e-94	6
DAG1	8.22822e-98	0.350833	0.897	0.694	1.80396e-93	6
PDLIM3	1.51986e-96	0.363277	0.839	0.618	3.33215e-92	6
SLC12A2	1.00159e-94	0.275964	0.3	0.104	2.19589e-90	6
ARHGEF2	3.09463e-94	0.28869	0.463	0.219	6.78466e-90	6
TSPAN3	7.10921e-93	0.256178	0.636	0.37	1.55862e-88	6
SUB1	8.76093e-93	0.314253	0.86	0.679	1.92075e-88	6
NPM1	9.59055e-92	0.255841	0.981	0.94	2.10263e-87	6
NINJ1	2.29401e-91	0.284365	0.591	0.33	5.02939e-87	6
LAMP2	4.30823e-90	0.324526	0.871	0.669	9.44536e-86	6
TIMM13	4.49934e-90	0.302957	0.791	0.567	9.86436e-86	6
SVIL	6.01956e-90	0.30581	0.541	0.288	1.31973e-85	6
PRELID1	6.76479e-89	0.329334	0.816	0.627	1.48311e-84	6
ITM2C	3.3868e-88	0.272812	0.543	0.291	7.42523e-84	6
MDK	1.63622e-86	0.398692	0.421	0.199	3.58724e-82	6
DUSP6	6.49508e-86	0.261052	0.286	0.1	1.42398e-81	6
RASSF4	7.19759e-85	0.391688	0.855	0.695	1.578e-80	6
CYB5A	1.17425e-84	0.250279	0.607	0.354	2.57443e-80	6
IDH2	1.19308e-84	0.255473	0.623	0.369	2.61572e-80	6
ITGB1	1.96397e-84	0.314492	0.872	0.706	4.30581e-80	6
CD9	6.91734e-83	0.295163	0.973	0.891	1.51656e-78	6
HOMER3	1.19582e-82	0.251302	0.437	0.211	2.62172e-78	6
HES6	9.47649e-82	0.385635	0.334	0.149	2.07763e-77	6
NME1	4.37283e-81	0.30214	0.638	0.398	9.587e-77	6
TLN2	2.74346e-80	0.295485	0.763	0.531	6.01477e-76	6
ANXA6	6.70141e-80	0.263213	0.619	0.373	1.46922e-75	6
SET	1.56972e-78	0.277192	0.903	0.744	3.44145e-74	6
FKBP1A	8.25333e-78	0.310986	0.737	0.518	1.80946e-73	6
HNRNPA1	4.17873e-77	0.268395	0.978	0.938	9.16146e-73	6
TMEM123	5.10359e-77	0.264224	0.821	0.606	1.11891e-72	6
NFIX	1.74348e-76	0.27303	0.866	0.68	3.8224e-72	6
TUBA1A	4.90948e-76	0.316767	0.977	0.884	1.07635e-71	6
LMO4	6.44447e-76	0.3133	0.714	0.483	1.41288e-71	6
APEX1	1.36617e-75	0.259793	0.82	0.608	2.99518e-71	6
PGF	1.26698e-74	0.411021	0.296	0.118	2.77773e-70	6
MAB21L1	3.7691e-74	0.296189	0.336	0.145	8.26337e-70	6
TIMM8B	5.10953e-74	0.263278	0.66	0.425	1.12021e-69	6
CRYAB	7.01148e-74	0.341395	0.969	0.867	1.5372e-69	6
RP11-553L6.5	1.47402e-73	0.262369	0.629	0.392	3.23164e-69	6
SOX4	1.97938e-73	0.352714	0.76	0.537	4.33958e-69	6
SLC29A1	2.87383e-73	0.277227	0.437	0.224	6.30059e-69	6
ENO1	4.98237e-72	0.295739	0.825	0.644	1.09233e-67	6
CADM2	5.25661e-72	0.275957	0.875	0.692	1.15246e-67	6
LMNA	1.69676e-71	0.294081	0.967	0.912	3.71998e-67	6
UBE2E3	2.0713e-71	0.251845	0.653	0.42	4.54113e-67	6
SRM	1.94912e-70	0.254905	0.605	0.375	4.27325e-66	6
MDH2	5.42171e-70	0.270484	0.808	0.624	1.18866e-65	6
ANKRD65	8.3182e-70	0.27266	0.591	0.363	1.82368e-65	6
S100A16	2.60259e-69	0.259661	0.537	0.313	5.70592e-65	6
UQCR11	1.26485e-68	0.262512	0.834	0.657	2.77305e-64	6
UQCR10	2.04754e-67	0.253984	0.823	0.638	4.48902e-63	6
FXYD6	2.75909e-67	0.272347	0.641	0.416	6.04902e-63	6
POLR2L	2.7257e-65	0.254425	0.832	0.646	5.97581e-61	6
ZNF106	1.26669e-62	0.2649	0.668	0.452	2.77709e-58	6
PHLDA3	1.2711e-61	0.273793	0.629	0.412	2.78677e-57	6
MIF	4.05576e-58	0.303064	0.84	0.701	8.89186e-54	6
COL18A1	6.55071e-58	0.25288	0.83	0.652	1.43618e-53	6
CYB5R1	9.63498e-52	0.25059	0.583	0.388	2.11237e-47	6
OLFML3	2.19326e-46	0.356632	0.509	0.365	4.80851e-42	6
ACTA2	3.64758e-40	0.256704	0.299	0.158	7.99695e-36	6
PLAC9	3.52059e-31	0.255762	0.565	0.412	7.71854e-27	6

## Sheet: Cluster 7
gene	p_val	avg_logFC	pct.1	pct.2	p_val_adj	cluster
KRT17	0	1.47	0.637	0.019	0	7
PTGDS	0	1.09312	0.963	0.709	0	7
ALDH1A3	0	1.07457	0.712	0.116	0	7
DLK1	0	0.91044	0.98	0.83	0	7
HHIP	0	0.658996	0.384	0.016	0	7
CHODL	3.07026e-276	0.756893	0.622	0.221	6.73123e-272	7
CRLF1	1.8505e-265	0.658076	0.649	0.216	4.05705e-261	7
RASSF2	1.27975e-222	0.31048	0.265	0.026	2.80573e-218	7
IGF1	1.95819e-206	0.666547	0.802	0.445	4.29314e-202	7
FGL2	2.44135e-176	0.542825	0.865	0.585	5.35241e-172	7
FN1	4.8198e-157	0.547828	0.879	0.638	1.05669e-152	7
FRMD3	1.90389e-155	0.447738	0.578	0.244	4.17409e-151	7
MRAP2	1.92911e-146	0.389651	0.453	0.155	4.22938e-142	7
TSPAN5	4.60601e-146	0.318699	0.295	0.065	1.00982e-141	7
RHOC	7.39316e-140	0.463331	0.814	0.57	1.62088e-135	7
PLAC9	3.07408e-138	0.570616	0.711	0.409	6.73962e-134	7
CNN3	8.01943e-132	0.375924	0.965	0.847	1.75818e-127	7
CAMK2N1	1.66547e-130	0.489788	0.791	0.528	3.65138e-126	7
SCARA3	2.55763e-128	0.275034	0.257	0.052	5.60736e-124	7
PCBP4	2.59581e-128	0.343594	0.397	0.131	5.69105e-124	7
MDK	4.13391e-128	0.481126	0.492	0.198	9.06319e-124	7
ADAMTS5	1.43941e-118	0.465888	0.604	0.312	3.15577e-114	7
SFRP4	2.70573e-118	0.394525	0.498	0.213	5.93205e-114	7
CD59	8.75257e-117	0.414317	0.867	0.669	1.91891e-112	7
ATP1A2	4.02577e-115	0.431443	0.553	0.267	8.82611e-111	7
MARCKS	1.32846e-114	0.410047	0.653	0.348	2.91251e-110	7
TFDP2	3.50247e-104	0.37702	0.666	0.393	7.67882e-100	7
STMN1	8.15174e-104	0.358519	0.682	0.387	1.78719e-99	7
ACTN1	6.96789e-100	0.337766	0.463	0.203	1.52764e-95	7
PHLDA3	3.40434e-99	0.417302	0.689	0.411	7.46367e-95	7
RBP1	4.45473e-99	0.398902	0.936	0.802	9.76656e-95	7
DIO2	2.78712e-97	0.422702	0.6	0.324	6.11049e-93	7
FAM132B	2.64865e-95	0.530098	0.505	0.253	5.80689e-91	7
CCND2	1.43467e-92	0.328134	0.391	0.156	3.14537e-88	7
GLUL	3.18116e-92	0.34365	0.948	0.826	6.97436e-88	7
MAP1B	4.74755e-92	0.387174	0.655	0.385	1.04085e-87	7
MATN2	9.87981e-92	0.32082	0.465	0.211	2.16605e-87	7
NCKAP5L	2.18308e-89	0.333774	0.474	0.23	4.78618e-85	7
SCARA5	1.18846e-88	0.335308	0.305	0.106	2.60558e-84	7
TMSB10	9.41647e-88	0.337384	0.994	0.972	2.06447e-83	7
NPDC1	2.1283e-87	0.30229	0.422	0.186	4.6661e-83	7
KCTD12	1.18434e-85	0.359632	0.632	0.376	2.59654e-81	7
STIM2	6.06771e-85	0.264823	0.31	0.11	1.33029e-80	7
TUBA1A	4.82877e-81	0.343748	0.977	0.884	1.05866e-76	7
PCDH7	1.03144e-79	0.280156	0.305	0.111	2.26132e-75	7
GNB5	1.70396e-78	0.257243	0.373	0.156	3.73576e-74	7
CCND1	5.96403e-78	0.285531	0.376	0.159	1.30755e-73	7
ADAMTS1	2.60773e-76	0.321642	0.505	0.263	5.71718e-72	7
APP	3.49983e-76	0.286154	0.915	0.759	7.67303e-72	7
LSP1	9.7127e-76	0.318131	0.868	0.696	2.12941e-71	7
ZFYVE21	4.51018e-75	0.323262	0.7	0.469	9.88812e-71	7
PALLD	1.10446e-74	0.336793	0.712	0.477	2.42142e-70	7
TAGLN	6.45577e-74	0.392912	0.68	0.435	1.41536e-69	7
NLGN4X	1.43363e-73	0.253442	0.357	0.151	3.14309e-69	7
RAB34	1.8629e-71	0.295637	0.807	0.6	4.08422e-67	7
MYL6	1.30721e-69	0.252289	0.976	0.92	2.86593e-65	7
MARCKSL1	3.70903e-66	0.265688	0.407	0.197	8.13168e-62	7
MEG3	4.90695e-66	0.275266	0.99	0.956	1.0758e-61	7
EPDR1	5.33804e-60	0.275375	0.601	0.384	1.17031e-55	7
LMO4	2.7586e-59	0.275013	0.704	0.484	6.04796e-55	7
MZT2A	4.39012e-59	0.275442	0.692	0.481	9.62491e-55	7
PTMS	7.78224e-59	0.263943	0.9	0.755	1.70618e-54	7
MEST	2.00262e-57	0.256712	0.762	0.55	4.39055e-53	7
CLU	6.46676e-57	0.288735	0.973	0.9	1.41777e-52	7
CD44	4.444e-55	0.270502	0.52	0.311	9.74303e-51	7
CRYAB	2.77331e-53	0.270856	0.956	0.868	6.0802e-49	7
FILIP1L	2.06413e-43	0.286619	0.662	0.482	4.52539e-39	7
FABP5	4.24934e-41	0.37873	0.419	0.259	9.31625e-37	7
CCL2	1.47381e-30	0.260379	0.368	0.224	3.23119e-26	7
ANGPTL4	1.45024e-20	0.28812	0.421	0.313	3.1795e-16	7

## Sheet: Cluster 8
gene	p_val	avg_logFC	pct.1	pct.2	p_val_adj	cluster
KDM6B	0	0.304437	0.709	0.209	0	8
DDX3Y	0	0.262948	0.812	0.304	0	8
ANGPTL4	4.76279282590962e-321	0.373433	0.81	0.306	1.04419469915242e-316	8
GREM1	0	0.29693	0.757	0.286	3.36526e-305	8
MLF1	5.39109e-304	0.257035	0.672	0.225	1.18194e-299	8
LDLR	1.78314e-298	0.36093	0.63	0.182	3.90935e-294	8
MIDN	6.14775e-276	0.321959	0.869	0.397	1.34783e-271	8
HSPH1	9.60764e-273	0.369975	0.768	0.296	2.10638e-268	8
NAMPT	3.678e-257	0.254008	0.784	0.345	8.06365e-253	8
IRF1	6.10443e-246	0.399675	0.906	0.451	1.33833e-241	8
KLF10	1.70417e-232	0.418517	0.845	0.392	3.73623e-228	8
MTRNR2L8	5.12264e-219	0.737028	0.959	0.599	1.12309e-214	8
METRNL	2.91693e-209	0.298332	0.92	0.521	6.39507e-205	8
SOX4	1.49787e-198	0.29147	0.927	0.535	3.28393e-194	8
IER3	8.5054e-194	0.323984	0.902	0.504	1.86472e-189	8
NR4A1	2.01379e-189	0.255443	0.926	0.549	4.41503e-185	8
MAFF	4.68647e-186	0.281891	0.883	0.495	1.02746e-181	8
C11orf96	2.95972e-184	0.554143	0.749	0.341	6.48888e-180	8
HSPA1B	5.99782e-168	0.624579	0.96	0.677	1.31496e-163	8
ID3	2.96374e-162	0.280147	0.958	0.632	6.49771e-158	8
ATF3	1.59577e-161	0.25749	0.943	0.609	3.49856e-157	8
ID1	1.14467e-158	0.250821	0.961	0.64	2.50957e-154	8
ZFP36L1	6.26547e-155	0.38862	0.972	0.732	1.37364e-150	8
MYADM	1.43447e-154	0.283258	0.893	0.548	3.14493e-150	8
SOD2	1.39204e-133	0.374321	0.936	0.634	3.0519e-129	8
HSPA1A	2.1779e-129	0.580257	0.976	0.785	4.77484e-125	8
KCNQ1OT1	2.79717e-120	0.297056	0.969	0.722	6.13251e-116	8
GADD45B	2.0937e-116	0.273315	0.984	0.791	4.59023e-112	8
DNAJB1	3.72571e-113	0.329333	0.983	0.771	8.16824e-109	8
FOSB	3.15901e-109	0.344327	0.997	0.94	6.92581e-105	8
DNAJA1	1.32093e-104	0.25833	0.977	0.767	2.89601e-100	8
CYR61	1.73387e-102	0.285495	0.935	0.682	3.80134e-98	8
NEAT1	1.40012e-97	0.310519	0.97	0.803	3.06961e-93	8
IER2	1.15738e-95	0.267753	0.995	0.901	2.53745e-91	8
TXNIP	1.95259e-94	0.299755	0.989	0.859	4.28086e-90	8
PPP1R15A	2.67755e-83	0.262123	0.956	0.755	5.87026e-79	8
HSP90AA1	1.29992e-79	0.286235	0.996	0.968	2.84993e-75	8
EGR1	1.09424e-76	0.252043	0.991	0.879	2.39902e-72	8
TNNC2	0	4.95778	0.993	0.057	0	9
TNNI2	0	4.33089	0.996	0.027	0	9
TNNT3	0	4.27598	0.997	0.045	0	9
MYLPF	0	4.18749	0.993	0.044	0	9
TTN	0	4.0715	0.993	0.038	0	9
MYL1	0	4.03373	0.999	0.034	0	9
CKM	0	3.95173	0.996	0.049	0	9
TNNC1	0	3.40427	0.905	0.023	0	9
MB	0	3.39148	0.957	0.033	0	9
COX6A2	0	3.39144	0.987	0.119	0	9
NEB	0	3.22629	0.989	0.464	0	9
MYOZ1	0	3.18424	0.981	0.013	0	9
ACTA1	0	3.16817	0.935	0.074	0	9
CA3	0	3.16037	0.986	0.277	0	9
TNNI1	0	2.92648	0.935	0.02	0	9
TPM1	0	2.79278	0.986	0.477	0	9
S100A1	0	2.76642	0.937	0.035	0	9
MYBPC1	0	2.64007	0.971	0.04	0	9
ENO3	0	2.57703	0.936	0.042	0	9
RRAD	0	2.53219	0.856	0.076	0	9
DES	0	2.4419	0.998	0.735	0	9
MYH2	0	2.38591	0.739	0.006	0	9
TPM2	0	2.36376	0.991	0.591	0	9
FHL1	0	2.32186	0.952	0.28	0	9
NEXN	0	2.31975	0.922	0.084	0	9
TCAP	0	2.29366	0.939	0.193	0	9
SLN	0	2.24333	0.881	0.076	0	9
GAMT	0	2.20515	0.968	0.207	0	9
BIN1	0	2.19656	0.952	0.121	0	9
CSRP3	0	2.18221	0.871	0.004	0	9
SAA1	0	2.161	0.472	0.001	0	9
CMYA5	0	2.15009	0.927	0.059	0	9
TNNT1	0	2.14701	0.284	0.023	0	9
ACTC1	0	2.05152	0.803	0.045	0	9
MYBPC2	0	2.01869	0.813	0.003	0	9
IL32	0	1.95679	0.954	0.423	0	9
TRIM63	0	1.92086	0.858	0.003	0	9
EEF1A2	0	1.9109	0.639	0.005	0	9
CALML6	0	1.8669	0.815	0.002	0	9
PDLIM5	0	1.86349	0.94	0.126	0	9
RAMP1	0	1.78537	0.894	0.005	0	9
XIRP2	0	1.7536	0.809	0.003	0	9
MEF2C	0	1.72956	0.91	0.174	0	9
ACTN2	0	1.69061	0.892	0.023	0	9
PGAM2	0	1.65967	0.834	0.026	0	9
PDE4DIP	0	1.63378	0.888	0.178	0	9
HSPB3	0	1.63093	0.787	0.003	0	9
HSPB1	0	1.61682	0.989	0.72	0	9
MAP3K7CL	0	1.59731	0.798	0.082	0	9
FGGY	0	1.58385	0.84	0.125	0	9
LMOD2	0	1.58111	0.686	0.002	0	9
CRYAB	0	1.57728	1	0.868	0	9
YBX3	0	1.5717	1	0.9	0	9
TMEM52	0	1.5464	0.79	0.018	0	9
ART3	0	1.53287	0.847	0.002	0	9
RP11-451G4.2	0	1.50894	0.621	0.003	0	9
PEBP4	0	1.50337	0.808	0.015	0	9
PDK4	0	1.50315	0.949	0.491	0	9
CKB	0	1.48613	0.735	0.048	0	9
AK1	0	1.4692	0.924	0.44	0	9
PDLIM3	0	1.42047	0.976	0.618	0	9
CASQ2	0	1.39603	0.763	0.003	0	9
MT1X	0	1.39433	0.997	0.985	0	9
FAM134B	0	1.37577	0.689	0.022	0	9
ETS2	0	1.37563	0.785	0.138	0	9
TXLNB	0	1.37464	0.791	0.029	0	9
SYNPO2	0	1.36362	0.828	0.211	0	9
SMPX	0	1.35734	0.713	0.002	0	9
HSPB6	0	1.34073	0.779	0.103	0	9
ATPIF1	0	1.32878	0.952	0.659	0	9
MYH8	0	1.32494	0.419	0.007	0	9
KLHL40	0	1.31501	0.755	0.01	0	9
PTP4A3	0	1.30992	0.753	0.064	0	9
NRAP	0	1.27469	0.706	0.002	0	9
UQCR11.1	0	1.26284	0.462	0.038	0	9
RPL3L	0	1.25254	0.736	0.006	0	9
ATP2A1	0	1.25076	0.546	0.006	0	9
KLHL41	0	1.25028	0.953	0.575	0	9
COX7A1	0	1.25015	0.98	0.76	0	9
SVIL	0	1.24272	0.881	0.285	0	9
MYOT	0	1.24126	0.725	0.034	0	9
XIRP1	0	1.24023	0.536	0.013	0	9
HSPB8	0	1.22378	0.78	0.046	0	9
SLC25A4	0	1.20366	0.823	0.266	0	9
IGF2	0	1.19953	0.436	0.019	0	9
HSPB7	0	1.19464	0.708	0.032	0	9
TMEM38A	0	1.16517	0.751	0.118	0	9
APOBEC2	0	1.15346	0.653	0.024	0	9
CACNG1	0	1.14947	0.704	0.001	0	9
LDB3	0	1.14487	0.692	0.007	0	9
TRDN	0	1.13088	0.99	0.705	0	9
CALM1	0	1.1249	0.979	0.835	0	9
CTD-2545M3.8	0	1.12033	0.689	0.011	0	9
FBXO32	0	1.0953	0.639	0.174	0	9
MURC	0	1.09518	0.541	0.002	0	9
DCXR	0	1.09483	0.809	0.33	0	9
FXYD1	0	1.06961	0.959	0.694	0	9
ABRA	0	1.06434	0.516	0.001	0	9
LMOD3	0	1.05871	0.635	0.025	0	9
STAC3	0	1.05623	0.956	0.648	0	9
FST	0	1.05364	0.543	0.075	0	9
RBM24	0	1.03938	0.595	0.019	0	9
ARPP21	0	1.03416	0.642	0.023	0	9
CASQ1	0	1.02405	0.576	0.002	0	9
ADSSL1	0	1.01724	0.656	0.044	0	9
PACSIN3	0	1.01641	0.72	0.138	0	9
PCNT	0	1.0147	0.687	0.106	0	9
DMD	0	1.01284	0.697	0.112	0	9
RYR1	0	1.01144	0.674	0.045	0	9
CAP2	0	1.00523	0.67	0.035	0	9
MYH1	0	0.990214	0.292	0.015	0	9
PTP4A1	0	0.981093	0.728	0.135	0	9
CPE	0	0.967274	0.555	0.025	0	9
SLC25A33	0	0.954584	0.622	0.101	0	9
ANKRD23	0	0.950232	0.621	0.007	0	9
ATP2A2	0	0.948454	0.662	0.164	0	9
GAPDH	0	0.922625	0.998	0.991	0	9
PPP1R27	0	0.919246	0.428	0.006	0	9
SCN1B	0	0.918122	0.634	0.135	0	9
PFKM	0	0.912443	0.664	0.128	0	9
SLPI	0	0.911202	0.303	0	0	9
CACNB1	0	0.894688	0.604	0.031	0	9
PGM1	0	0.890369	0.687	0.198	0	9
ARG2	0	0.885466	0.432	0.02	0	9
MAP4	0	0.884372	0.837	0.492	0	9
RPLP1	0	0.86807	1	1	0	9
PRKAA2	0	0.865329	0.626	0.053	0	9
MLTK	0	0.865084	0.361	0.01	0	9
KLF5	0	0.86272	0.637	0.145	0	9
HSPB2	0	0.861504	0.762	0.26	0	9
FITM1	0	0.860523	0.803	0.349	0	9
AMPD1	0	0.858107	0.556	0.001	0	9
CAMK2B	0	0.845096	0.596	0.004	0	9
RBFOX1	0	0.843045	0.605	0.034	0	9
TRIM54	0	0.840634	0.572	0.001	0	9
CDC42EP3	0	0.835591	0.63	0.199	0	9
LMO7	0	0.822731	0.574	0.074	0	9
COBL	0	0.80873	0.495	0.004	0	9
HRC	0	0.808315	0.567	0.002	0	9
TCEA3	0	0.805765	0.89	0.566	0	9
MALAT1	0	0.798236	1	1	0	9
PRDX6	0	0.783661	0.942	0.781	0	9
LINC01497	0	0.77945	0.292	0.007	0	9
MSI2	0	0.774291	0.59	0.116	0	9
MYOG	0	0.7727	0.4	0.011	0	9
UBAC1	0	0.770024	0.709	0.311	0	9
ALDOA	0	0.757517	0.977	0.896	0	9
SRPK3	0	0.757062	0.608	0.147	0	9
MYOZ2	0	0.75275	0.381	0.005	0	9
MYOM1	0	0.752205	0.531	0.005	0	9
CAPN3	0	0.746635	0.508	0.016	0	9
YBX1	0	0.743123	0.984	0.944	0	9
OBSCN	0	0.742499	0.519	0.008	0	9
LIMCH1	0	0.739956	0.585	0.111	0	9
LRRC2	0	0.739826	0.539	0.06	0	9
SYNPO2L	0	0.738175	0.514	0.007	0	9
RTN4	0	0.707469	0.935	0.815	0	9
NDUFA4	0	0.70669	0.978	0.902	0	9
PMAIP1	0	0.69621	0.459	0.032	0	9
ADPRHL1	0	0.690946	0.403	0.031	0	9
FAM129A	0	0.683438	0.495	0.047	0	9
ITGA10	0	0.672313	0.357	0.013	0	9
SYNM	0	0.665228	0.442	0.011	0	9
SMYD1	0	0.659491	0.477	0.003	0	9
GMPR	0	0.659309	0.511	0.04	0	9
ATP5G2	0	0.657837	0.978	0.92	0	9
JPH1	0	0.65609	0.508	0.046	0	9
TMOD1	0	0.624674	0.48	0.028	0	9
COL19A1	0	0.618106	0.376	0.005	0	9
UNC45B	0	0.612253	0.459	0.002	0	9
MIR133A1HG	0	0.608423	0.291	0.001	0	9
FABP3	0	0.580486	0.372	0.003	0	9
SEMA6C	0	0.57545	0.467	0.05	0	9
PPP1R3A	0	0.5746	0.393	0	0	9
DEPTOR	0	0.574153	0.42	0.01	0	9
DUSP26	0	0.569472	0.436	0.026	0	9
ANK3	0	0.555599	0.429	0.034	0	9
SLC7A6	0	0.544946	0.412	0.012	0	9
SCN3B	0	0.520397	0.356	0.011	0	9
DNAH11	0	0.497068	0.345	0.001	0	9
ARHGAP36	0	0.487468	0.346	0	0	9
GPD1	0	0.482262	0.345	0.002	0	9
POPDC2	0	0.480713	0.366	0.014	0	9
SGCG	0	0.480417	0.368	0.001	0	9
INPP4B	0	0.456935	0.336	0.005	0	9
MYOM3	0	0.452128	0.309	0.004	0	9
TMEM182	0	0.442965	0.332	0.007	0	9
SMTNL1	0	0.431783	0.285	0	0	9
PLN	0	0.419361	0.302	0.004	0	9
HHATL	0	0.417629	0.312	0.002	0	9
TP63	0	0.414282	0.333	0.004	0	9
CACNA1S	0	0.408361	0.296	0.003	0	9
LINC00475	0	0.407171	0.269	0.004	0	9
BTNL8	0	0.406088	0.265	0	0	9
LINC01372	0	0.363938	0.27	0.002	0	9
LRRC39	0	0.362408	0.262	0.002	0	9
SOX7	1.28457067918724e-322	0.484737	0.318	0.012	2.81629275705011e-318	9
FHL3	3.5835177877133e-315	0.814464	0.692	0.306	7.85650439778263e-311	9
COX17	1.58421164162711e-312	0.768926	0.813	0.408	3.47323e-308	9
CACNG6	3.86325187849456e-312	0.31593	0.264	0.005	8.46979e-308	9
ELN	5.13231570967436e-311	0.669432	0.432	0.044	1.12521e-306	9
NHLH2	0	0.36228	0.256	0.005	3.41086e-304	9
PKDCC	1.06134e-305	0.662469	0.472	0.065	2.32687e-301	9
SNX7	8.95311e-305	0.707038	0.621	0.167	1.96288e-300	9
LRRK2	2.13465e-302	0.657645	0.409	0.044	4.68001e-298	9
COX5A	4.19859e-302	0.694192	0.856	0.551	9.20499e-298	9
EFCAB7	2.83529e-296	0.550919	0.441	0.049	6.21609e-292	9
LMCD1	5.96833e-294	0.817636	0.575	0.165	1.3085e-289	9
EHBP1L1	7.48031e-294	0.598415	0.509	0.082	1.63998e-289	9
MRP63	2.99962e-291	0.53256	0.291	0.018	6.57637e-287	9
ANGPT2	2.11303e-290	0.506968	0.319	0.017	4.63261e-286	9
UQCR10	2.36928e-289	0.685734	0.891	0.638	5.19442e-285	9
MYF6	8.61961e-289	0.803884	0.88	0.677	1.88976e-284	9
ARID5B	4.85852e-288	0.993897	0.877	0.642	1.06518e-283	9
BEST3	1.10909e-280	0.718744	0.671	0.21	2.43157e-276	9
GADD45G	5.14594e-280	1.21158	0.807	0.338	1.1282e-275	9
DUSP27	2.69864e-279	0.461065	0.38	0.032	5.9165e-275	9
CDKN1A	1.19502e-276	0.831283	0.853	0.471	2.61996e-272	9
MYOM2	1.71753e-273	0.462349	0.374	0.03	3.76551e-269	9
NEAT1	1.51257e-271	0.804386	0.97	0.803	3.31617e-267	9
SETD5-AS1	1.92766e-271	0.767168	0.354	0.03	4.2262e-267	9
ABLIM2	1.99708e-270	0.443184	0.348	0.025	4.3784e-266	9
UTP11L	5.71116e-266	0.748591	0.675	0.237	1.25211e-261	9
TLE1	7.18392e-266	0.627561	0.507	0.084	1.575e-261	9
AC013461.1	4.02513e-265	0.655273	0.456	0.265	8.8247e-261	9
KIF1B	2.9001e-264	0.700349	0.636	0.209	6.35817e-260	9
OTUD1	7.59784e-261	0.912707	0.516	0.196	1.66575e-256	9
CPEB4	7.60125e-259	0.678929	0.596	0.162	1.6665e-254	9
TRIM55	1.35544e-258	0.582186	0.512	0.096	2.97166e-254	9
NHP2L1	1.50543e-257	0.438661	0.304	0.039	3.3005e-253	9
CORO6	1.11617e-255	0.691808	0.622	0.186	2.4471e-251	9
PHPT1	2.1428e-253	0.689181	0.874	0.603	4.69787e-249	9
GPRC5C	1.03862e-252	0.455669	0.361	0.032	2.27707e-248	9
OSBPL1A	7.41041e-246	0.704506	0.608	0.215	1.62466e-241	9
TMEM38B	1.83133e-244	0.549536	0.49	0.087	4.01501e-240	9
ADCY2	4.59464e-244	0.382127	0.326	0.024	1.00733e-239	9
CCDC57	6.37826e-243	0.621966	0.476	0.106	1.39837e-238	9
FAM184B	9.38198e-243	0.37563	0.288	0.017	2.05691e-238	9
C19orf47	2.38633e-242	0.453014	0.386	0.043	5.23178e-238	9
PDLIM7	1.09933e-240	0.581444	0.457	0.079	2.41018e-236	9
GADD45A	2.54088e-240	0.884114	0.808	0.54	5.57063e-236	9
ADIRF	5.1352e-240	0.730641	0.972	0.932	1.12584e-235	9
AGL	1.68184e-234	0.594824	0.461	0.093	3.68727e-230	9
TEAD4	4.25804e-234	0.319719	0.256	0.012	9.33532e-230	9
UBC	8.59223e-234	0.610518	1	0.99	1.88376e-229	9
ANK1	5.02147e-232	0.703389	0.684	0.253	1.10091e-227	9
MAFA	1.9364e-231	0.562758	0.384	0.053	4.24536e-227	9
HSF2	2.68436e-230	0.588082	0.518	0.121	5.88519e-226	9
FILIP1	8.27927e-226	0.714846	0.717	0.288	1.81515e-221	9
CARNS1	3.17052e-225	0.315741	0.262	0.014	6.95105e-221	9
EMC10	5.19582e-224	0.730586	0.561	0.258	1.13913e-219	9
PPP1R12B	1.40698e-223	0.522181	0.437	0.073	3.08466e-219	9
BLCAP	8.94806e-222	0.614264	0.504	0.138	1.96177e-217	9
UBE2G1	1.30932e-220	0.56313	0.513	0.116	2.87054e-216	9
EEF2	1.48777e-220	0.492783	0.994	0.956	3.26178e-216	9
MLIP	6.39078e-220	0.462363	0.426	0.066	1.40111e-215	9
ATP1A2	4.64534e-219	0.705409	0.655	0.267	1.01844e-214	9
KIAA1217	8.52035e-219	0.519053	0.451	0.083	1.868e-214	9
OSBPL6	2.96785e-217	0.528312	0.421	0.069	6.50672e-213	9
MIDN	1.64801e-215	0.793112	0.723	0.4	3.61311e-211	9
PSMA2.1	8.44182e-214	0.406276	0.256	0.031	1.85078e-209	9
PYGM	9.53094e-212	0.550555	0.423	0.087	2.08956e-207	9
SF3B14	1.48968e-210	0.41213	0.281	0.042	3.26596e-206	9
CES2	7.79542e-210	0.594102	0.485	0.126	1.70907e-205	9
NDUFB9	7.20405e-209	0.574248	0.925	0.759	1.57942e-204	9
IDH2	1.1843e-206	0.620365	0.739	0.369	2.59647e-202	9
CYB5R1	7.41669e-205	0.638828	0.728	0.388	1.62603e-200	9
FEM1A	4.26148e-204	0.449158	0.414	0.067	9.34287e-200	9
C1orf63	2.81522e-200	0.275998	0.255	0.045	6.17208e-196	9
SNTA1	5.59022e-200	0.534972	0.494	0.124	1.2256e-195	9
FDXR	1.02771e-199	0.46226	0.373	0.053	2.25316e-195	9
ACHE	4.53099e-199	0.468806	0.388	0.06	9.93374e-195	9
PKIA	1.1286e-198	0.51242	0.444	0.092	2.47435e-194	9
RPS27L	5.10812e-198	0.596517	0.893	0.663	1.1199e-193	9
LGI4	8.83781e-196	0.449338	0.4	0.064	1.9376e-191	9
DUSP23	1.4004e-193	0.613518	0.51	0.159	3.07023e-189	9
SMG1	8.57868e-193	0.608356	0.556	0.196	1.88079e-188	9
MT2A	1.32185e-187	1.20142	0.985	0.971	2.89803e-183	9
PDE4B	8.26331e-187	0.652871	0.504	0.175	1.81165e-182	9
USP54	2.43102e-183	0.450673	0.41	0.075	5.32977e-179	9
TRIM7	2.88891e-182	0.517407	0.454	0.11	6.33365e-178	9
SPPL2A	2.14182e-180	0.574427	0.665	0.341	4.69572e-176	9
PPP1R3C	7.17164e-179	0.364646	0.251	0.021	1.57231e-174	9
ABCA5	1.59504e-178	0.477612	0.442	0.094	3.49696e-174	9
CACNA2D1	2.53783e-178	0.382973	0.333	0.045	5.56394e-174	9
CEBPA	4.18445e-178	0.393051	0.255	0.023	9.17399e-174	9
MBNL1-AS1	3.61921e-175	0.329871	0.263	0.023	7.93477e-171	9
NFE2L1	7.80113e-175	0.535199	0.535	0.168	1.71032e-170	9
PPDPF	4.37655e-171	0.538897	0.909	0.751	9.59516e-167	9
DNAJB5	7.08615e-167	0.350391	0.307	0.04	1.55357e-162	9
MYOD1	7.67728e-167	0.467246	0.371	0.066	1.68317e-162	9
SH3BGR	1.79115e-166	0.499924	0.415	0.096	3.92691e-162	9
FSD1L	3.39642e-165	0.326012	0.273	0.029	7.44632e-161	9
MATR3	1.82521e-163	0.373529	0.267	0.036	4.00159e-159	9
RPL37A	5.04169e-163	0.351602	1	0.999	1.10534e-158	9
ECH1	1.27144e-162	0.541929	0.795	0.565	2.78751e-158	9
CFL2	2.15185e-162	0.562136	0.757	0.485	4.71771e-158	9
COX14	9.01787e-162	0.556583	0.648	0.286	1.97708e-157	9
AKAP6	1.1229e-161	0.354783	0.324	0.049	2.46185e-157	9
CSDE1	3.76364e-161	0.48999	0.859	0.731	8.2514e-157	9
MDM2	1.92708e-160	0.500395	0.423	0.106	4.22494e-156	9
MAST4	3.14485e-160	0.472453	0.325	0.059	6.89477e-156	9
BBC3	3.63775e-160	0.500948	0.409	0.097	7.97541e-156	9
UQCRQ	4.75199e-158	0.551472	0.87	0.646	1.04183e-153	9
TGFB1	6.00133e-158	0.463714	0.351	0.067	1.31573e-153	9
KPNA3	3.77186e-157	0.478219	0.519	0.16	8.26943e-153	9
BEX2	8.34599e-156	0.587864	0.597	0.221	1.82978e-151	9
RRAGD	1.2602e-155	0.359067	0.35	0.061	2.76286e-151	9
USP13	6.32497e-155	0.365071	0.349	0.061	1.38669e-150	9
ADI1	3.34866e-151	0.560525	0.63	0.272	7.34161e-147	9
EIF1AY	2.05636e-142	0.474234	0.518	0.17	4.50837e-138	9
RNF115	1.68108e-141	0.537903	0.65	0.322	3.68559e-137	9
FXR1	2.13053e-138	0.488912	0.781	0.573	4.67097e-134	9
SLC16A10	3.19288e-137	0.297203	0.276	0.039	7.00008e-133	9
BAG3	1.79432e-136	0.582145	0.669	0.321	3.93386e-132	9
FLNC	6.55758e-134	0.519383	0.597	0.257	1.43768e-129	9
CMBL	2.56383e-132	0.537869	0.588	0.289	5.62094e-128	9
TACC2	2.95253e-132	0.339739	0.366	0.081	6.47313e-128	9
PERP	1.45515e-131	0.444353	0.339	0.073	3.19028e-127	9
BHLHE40	3.17251e-130	0.536128	0.549	0.214	6.95541e-126	9
PRUNE2	7.71224e-129	0.496015	0.446	0.134	1.69083e-124	9
CAV3	1.01903e-128	0.45733	0.454	0.149	2.23412e-124	9
PKIG	1.4933e-128	0.452451	0.413	0.119	3.27391e-124	9
DIAPH1	2.88567e-125	0.345905	0.361	0.084	6.32654e-121	9
UQCC2	3.85976e-125	0.454191	0.496	0.175	8.46213e-121	9
ATP1B1	3.91783e-125	0.59852	0.695	0.4	8.58945e-121	9
RPL23A	6.80312e-125	0.392083	0.995	0.997	1.49152e-120	9
PLA2G15	8.75751e-125	0.265363	0.263	0.039	1.92e-120	9
RBM8A	1.24298e-124	0.486262	0.889	0.726	2.72512e-120	9
FAM174B	9.26365e-124	0.261118	0.254	0.037	2.03096e-119	9
TCEB2	1.37284e-123	0.413293	0.947	0.829	3.00982e-119	9
NDUFB11	1.90751e-123	0.448287	0.876	0.697	4.18202e-119	9
LMO2	3.6143e-123	0.528772	0.414	0.157	7.92399e-119	9
RAPH1	2.47768e-122	0.351818	0.322	0.068	5.43207e-118	9
TSPAN7	5.04409e-122	0.363308	0.357	0.083	1.10587e-117	9
PLEC	6.76077e-122	0.443742	0.539	0.207	1.48223e-117	9
S100A13	2.32102e-121	0.565542	0.855	0.733	5.08859e-117	9
LPIN1	6.46407e-121	0.431811	0.379	0.105	1.41718e-116	9
TAF7	7.22244e-121	0.466533	0.854	0.683	1.58345e-116	9
ADAMTSL4	4.73348e-120	0.276766	0.272	0.045	1.03777e-115	9
ACYP2	2.02531e-119	0.418056	0.49	0.17	4.44028e-115	9
HRAS	2.63652e-118	0.424292	0.459	0.169	5.7803e-114	9
DCAF6	1.60066e-117	0.366769	0.424	0.125	3.50929e-113	9
MAP1LC3B	2.37389e-117	0.506602	0.787	0.577	5.20451e-113	9
RPS25	4.61514e-117	0.269778	0.995	0.998	1.01182e-112	9
ASB8	6.28298e-117	0.476814	0.588	0.279	1.37748e-112	9
RORA	1.5341e-116	0.495044	0.56	0.257	3.36337e-112	9
DTNA	2.0419e-116	0.313037	0.313	0.065	4.47666e-112	9
SYNGR2	1.04849e-115	0.391486	0.447	0.142	2.29872e-111	9
ERRFI1	6.70726e-113	0.594557	0.542	0.242	1.4705e-108	9
ARHGAP10	2.79513e-112	0.38436	0.423	0.132	6.12804e-108	9
ADSL	6.93635e-111	0.438361	0.567	0.252	1.52072e-106	9
CUTC	1.02113e-109	0.420627	0.498	0.194	2.23872e-105	9
MYL5	4.45737e-109	0.491653	0.389	0.161	9.77235e-105	9
PM20D2	6.64977e-108	0.366106	0.374	0.107	1.45789e-103	9
NRG2	8.75947e-107	0.397585	0.347	0.099	1.92043e-102	9
STIM1	2.00812e-106	0.302275	0.303	0.067	4.4026e-102	9
UBE2D1	9.99829e-106	0.40051	0.483	0.177	2.19203e-101	9
PSMD4	1.15051e-105	0.441937	0.766	0.512	2.52239e-101	9
MTSS1	1.32115e-104	0.361029	0.405	0.126	2.8965e-100	9
PITX2	5.23634e-104	0.476177	0.515	0.22	1.14802e-99	9
GYG1	4.93562e-103	0.440894	0.508	0.21	1.08209e-98	9
TFEB	9.19323e-103	0.350044	0.394	0.12	2.01552e-98	9
AMOTL1	1.21244e-99	0.3029	0.302	0.07	2.65815e-95	9
TUBA4A	3.2122e-98	0.350232	0.361	0.104	7.04242e-94	9
UCP2	5.63596e-98	0.300325	0.292	0.067	1.23563e-93	9
RAD23A	6.75942e-98	0.413708	0.808	0.636	1.48193e-93	9
VCL	2.15849e-97	0.392455	0.416	0.147	4.73227e-93	9
PRRX1	1.12274e-95	0.433566	0.524	0.226	2.46149e-91	9
ALPK3	1.40749e-95	0.345737	0.388	0.125	3.08578e-91	9
SPAG7	2.01671e-94	0.441257	0.678	0.407	4.42143e-90	9
KLF10	2.85948e-94	0.572631	0.658	0.397	6.26913e-90	9
NDUFS7	6.58442e-94	0.420012	0.732	0.502	1.44357e-89	9
PPP1R14C	1.80066e-93	0.456477	0.655	0.4	3.94776e-89	9
UBE2B	2.52268e-92	0.391289	0.803	0.651	5.53073e-88	9
MT-CO1	9.37863e-92	0.315162	0.995	0.999	2.05617e-87	9
MAGED2	6.24917e-91	0.423498	0.764	0.604	1.37007e-86	9
CLTB	1.20515e-90	0.400659	0.668	0.383	2.64217e-86	9
CEBPG	1.51697e-90	0.253854	0.289	0.07	3.3258e-86	9
CFLAR	3.87952e-90	0.442658	0.615	0.336	8.50546e-86	9
POLR2L	1.14541e-89	0.43505	0.846	0.647	2.51121e-85	9
ADCK3	4.26505e-88	0.39786	0.485	0.219	9.3507e-84	9
GAS6	1.74116e-87	0.340464	0.442	0.166	3.81732e-83	9
DMPK	2.67022e-87	0.356191	0.434	0.165	5.85419e-83	9
SYNC	1.95294e-86	0.330311	0.383	0.13	4.28163e-82	9
PLIN3	1.20523e-85	0.424274	0.564	0.344	2.64235e-81	9
MKNK2	1.78814e-85	0.475447	0.729	0.507	3.92032e-81	9
C2orf88	1.98686e-85	0.2951	0.257	0.06	4.35599e-81	9
AKAP1	3.93146e-85	0.322474	0.377	0.126	8.61934e-81	9
PPP2R3A	4.02522e-85	0.285999	0.33	0.097	8.8249e-81	9
HES6	6.68648e-85	0.484137	0.392	0.149	1.46594e-80	9
NRIP1	1.20379e-84	0.40239	0.514	0.249	2.63918e-80	9
NDUFS5	1.96188e-84	0.342337	0.942	0.892	4.30123e-80	9
ANAPC11	2.31836e-84	0.403781	0.752	0.514	5.08276e-80	9
FIS1	5.06983e-84	0.379789	0.87	0.735	1.11151e-79	9
FHL2	1.05108e-83	0.428879	0.426	0.189	2.30439e-79	9
PPP2R3B	2.87244e-83	0.293776	0.352	0.113	6.29754e-79	9
HSDL2	3.61117e-83	0.32095	0.406	0.149	7.91712e-79	9
KIAA1715	3.77521e-83	0.376623	0.395	0.15	8.27677e-79	9
MAP7D1	9.68442e-82	0.378111	0.513	0.242	2.12321e-77	9
DGCR6	2.37132e-81	0.388214	0.4	0.147	5.19888e-77	9
BTBD1	6.11283e-81	0.274959	0.334	0.103	1.34018e-76	9
SEC14L1	1.40147e-80	0.348847	0.421	0.166	3.07258e-76	9
FDFT1	1.43608e-80	0.319256	0.323	0.101	3.14846e-76	9
CCNG1	9.65623e-80	0.401172	0.543	0.27	2.11703e-75	9
UQCRC1	2.81413e-79	0.359518	0.582	0.297	6.1697e-75	9
SELK	5.34274e-79	0.39186	0.811	0.618	1.17134e-74	9
CTNNAL1	8.91823e-79	0.26619	0.332	0.104	1.95523e-74	9
MID1IP1	9.55672e-79	0.460576	0.459	0.262	2.09522e-74	9
SGK1	1.77365e-78	0.39849	0.383	0.141	3.88855e-74	9
SSH2	2.83063e-78	0.380496	0.437	0.191	6.20588e-74	9
HINT1	3.32116e-78	0.33557	0.905	0.797	7.28131e-74	9
LINC00844	5.59146e-78	0.392424	0.313	0.1	1.22587e-73	9
PLCD3	3.31992e-77	0.338143	0.352	0.127	7.27859e-73	9
SESN1	1.25662e-76	0.40328	0.521	0.264	2.75501e-72	9
NDUFC1	1.94117e-76	0.353816	0.836	0.678	4.25583e-72	9
ADRM1	2.17228e-76	0.364558	0.574	0.318	4.76251e-72	9
PARD3	2.06531e-75	0.307958	0.356	0.125	4.52798e-71	9
STARD7	1.27855e-74	0.36339	0.454	0.209	2.80309e-70	9
GBE1	3.63826e-73	0.322363	0.459	0.199	7.97651e-69	9
PLA2G4C	9.08648e-73	0.260084	0.326	0.107	1.99212e-68	9
NDUFA1	3.16431e-72	0.362153	0.872	0.744	6.93744e-68	9
RPS16	7.25509e-72	0.258869	0.996	0.997	1.59061e-67	9
MGST3	1.56875e-71	0.336433	0.878	0.8	3.43933e-67	9
PSMA7	3.03763e-71	0.323933	0.886	0.772	6.65969e-67	9
TNFRSF12A	9.32005e-71	0.362817	0.372	0.138	2.04333e-66	9
MRPS6	9.45602e-71	0.295629	0.378	0.143	2.07314e-66	9
MKRN1	6.78522e-70	0.357656	0.507	0.26	1.48759e-65	9
HADH	2.6689e-69	0.290314	0.437	0.186	5.8513e-65	9
PNISR	2.68338e-69	0.346847	0.868	0.741	5.88304e-65	9
HIGD2A	2.94955e-69	0.381104	0.822	0.672	6.46659e-65	9
LACTB	1.50737e-67	0.26959	0.317	0.107	3.30476e-63	9
ZNF106	2.07902e-67	0.410026	0.667	0.454	4.55805e-63	9
GLUL	4.30215e-67	0.517479	0.886	0.828	9.43203e-63	9
AKAP9	2.85465e-66	0.373203	0.762	0.635	6.25853e-62	9
SNRNP25	3.79588e-66	0.305587	0.461	0.212	8.32208e-62	9
TOMM7	1.1943e-65	0.260159	0.985	0.978	2.61838e-61	9
ZNRF1	8.10165e-65	0.281614	0.329	0.121	1.7762e-60	9
PPP2R1A	1.31833e-64	0.300767	0.512	0.254	2.8903e-60	9
ATP5J2	2.32217e-64	0.333498	0.86	0.704	5.09113e-60	9
MYL12A	1.91632e-63	0.3679	0.916	0.863	4.20134e-59	9
STOM	2.87542e-63	0.362117	0.498	0.265	6.30406e-59	9
LRRC28	5.0269e-62	0.252493	0.284	0.094	1.1021e-57	9
FKBP3	1.42677e-61	0.347536	0.597	0.35	3.12805e-57	9
CNBP	8.92097e-61	0.275993	0.943	0.898	1.95583e-56	9
TNS1	1.85202e-60	0.278638	0.314	0.117	4.06037e-56	9
EIF4E2	4.23473e-60	0.32522	0.559	0.317	9.28423e-56	9
NDUFA3	4.76215e-60	0.36312	0.681	0.454	1.04405e-55	9
PPP1R2	6.03272e-60	0.340485	0.476	0.241	1.32261e-55	9
TUBB	1.87853e-59	0.344809	0.806	0.645	4.1185e-55	9
SMAD3	1.06107e-58	0.268438	0.366	0.15	2.32629e-54	9
RAB10	1.11767e-58	0.376559	0.619	0.432	2.45037e-54	9
PREPL	4.72877e-57	0.271085	0.43	0.201	1.03673e-52	9
DUSP13	6.2837e-57	0.303119	0.392	0.177	1.37764e-52	9
PSMC3	1.06955e-56	0.330014	0.704	0.499	2.34487e-52	9
SERTAD3	1.26882e-56	0.323858	0.438	0.213	2.78176e-52	9
NAA50	1.69443e-56	0.302213	0.425	0.2	3.71487e-52	9
MEF2D	2.35176e-56	0.258659	0.408	0.184	5.156e-52	9
PSMB5	3.19144e-56	0.33151	0.709	0.503	6.9969e-52	9
DDB1	3.27397e-56	0.288856	0.428	0.202	7.17786e-52	9
KIF1C	3.67426e-56	0.252312	0.33	0.13	8.05544e-52	9
PDHA1	3.89968e-56	0.311541	0.532	0.3	8.54967e-52	9
SMIM4	2.37503e-55	0.301094	0.387	0.176	5.20701e-51	9
MACROD1	5.26191e-55	0.301827	0.592	0.349	1.15362e-50	9
NDUFB10	6.26079e-55	0.309006	0.839	0.737	1.37262e-50	9
ANKRD9	1.40739e-54	0.329746	0.374	0.194	3.08557e-50	9
H2AFJ	1.58425e-54	0.345765	0.604	0.384	3.47332e-50	9
DGKD	2.19075e-54	0.260781	0.327	0.13	4.803e-50	9
ACO2	5.0561e-54	0.256042	0.416	0.195	1.1085e-49	9
U2AF1	5.11154e-54	0.269494	0.419	0.197	1.12065e-49	9
USO1	1.05959e-53	0.281744	0.47	0.239	2.32305e-49	9
MCL1	1.2306e-53	0.350232	0.779	0.606	2.69797e-49	9
FAM207A	1.85683e-53	0.260803	0.39	0.177	4.07091e-49	9
NDUFB2	4.69752e-53	0.327161	0.767	0.613	1.02988e-48	9
FKBP5	6.22582e-53	0.319561	0.824	0.604	1.36495e-48	9
CDC37L1	1.03433e-52	0.294326	0.404	0.194	2.26767e-48	9
GGT7	2.24069e-52	0.305512	0.29	0.121	4.91249e-48	9
PTPN14	2.8546e-52	0.263806	0.3	0.117	6.25842e-48	9
TP53I3	1.3347e-51	0.282065	0.372	0.17	2.92621e-47	9
YWHAG	2.0405e-51	0.267658	0.451	0.228	4.47359e-47	9
IER5	5.22156e-51	0.380924	0.668	0.496	1.14477e-46	9
ATP5I	5.25821e-51	0.32023	0.904	0.807	1.15281e-46	9
COX5B	9.80177e-51	0.285312	0.92	0.86	2.14894e-46	9
LSM4	3.42118e-50	0.297989	0.527	0.307	7.50059e-46	9
FBXW5	1.79911e-49	0.313119	0.495	0.293	3.94438e-45	9
RPL13A	2.08908e-49	0.442706	0.997	0.996	4.58009e-45	9
COX8A	6.72266e-49	0.295056	0.876	0.765	1.47388e-44	9
ASB5	1.45453e-48	0.258307	0.4	0.192	3.1889e-44	9
KTN1	4.19248e-48	0.304309	0.849	0.714	9.19158e-44	9
NDUFB1	6.427e-48	0.328065	0.811	0.65	1.40905e-43	9
TMEM245	7.07458e-48	0.25143	0.353	0.16	1.55103e-43	9
PSMB6	4.10171e-47	0.279766	0.801	0.663	8.9926e-43	9
MT1E	4.83935e-47	0.855173	0.883	0.902	1.06098e-42	9
HES1	5.82468e-47	0.359896	0.736	0.531	1.277e-42	9
NDUFS4	9.69714e-47	0.291647	0.805	0.648	2.126e-42	9
GBAS	5.74003e-46	0.311165	0.609	0.405	1.25844e-41	9
HTATSF1	8.15349e-46	0.276754	0.484	0.27	1.78757e-41	9
TSPAN3	1.09516e-45	0.31294	0.544	0.374	2.40103e-41	9
WBSCR22	3.66818e-45	0.282648	0.587	0.363	8.04212e-41	9
NDUFA13	8.73467e-45	0.303831	0.749	0.556	1.91499e-40	9
CCSER2	5.62457e-44	0.274909	0.532	0.318	1.23313e-39	9
RBM38	1.46882e-43	0.252441	0.348	0.165	3.22025e-39	9
POLR2I	2.3088e-43	0.288637	0.765	0.606	5.06181e-39	9
ZBTB16	6.50504e-43	0.320702	0.806	0.629	1.42617e-38	9
CLEC2B	1.69692e-42	0.284046	0.414	0.217	3.72033e-38	9
TAX1BP1	2.25325e-42	0.27964	0.658	0.453	4.94002e-38	9
ALDH2	7.66378e-42	0.326866	0.486	0.349	1.68021e-37	9
COX7B	3.6642e-40	0.280345	0.818	0.698	8.03338e-36	9
PLIN2	3.50244e-39	0.290386	0.419	0.235	7.67875e-35	9
PRDX2	4.9561e-39	0.254841	0.811	0.689	1.08657e-34	9
ARRDC3	7.46602e-39	0.255605	0.276	0.122	1.63685e-34	9
NAMPT	2.20078e-38	0.294008	0.555	0.35	4.82499e-34	9
MBNL1	3.81147e-38	0.267852	0.592	0.397	8.35626e-34	9
FADS1	9.01712e-38	0.326786	0.313	0.18	1.97691e-33	9
RPL31	9.50306e-38	0.296653	0.965	0.974	2.08345e-33	9
MRPL33	1.96145e-36	0.273163	0.729	0.564	4.30029e-32	9
HIST1H1C	3.27583e-36	0.354665	0.483	0.299	7.18192e-32	9
MRPL40	3.49957e-36	0.255061	0.626	0.433	7.67245e-32	9
FOSL2	6.18782e-36	0.285565	0.423	0.245	1.35662e-31	9
ASPH	6.79919e-36	0.287585	0.598	0.433	1.49065e-31	9
FAM177A1	1.79231e-35	0.262461	0.487	0.296	3.92946e-31	9
DBI	1.3802e-34	0.323867	0.869	0.815	3.02594e-30	9
AHNAK	2.46792e-34	0.257032	0.838	0.788	5.41067e-30	9
CYSTM1	3.02136e-34	0.298165	0.598	0.43	6.62403e-30	9
STAT3	4.87481e-34	0.267471	0.745	0.588	1.06875e-29	9
JAK1	3.49667e-33	0.257349	0.547	0.371	7.66609e-29	9
NFIL3	6.54504e-33	0.263429	0.51	0.325	1.43493e-28	9
ACADVL	2.62162e-32	0.252726	0.649	0.485	5.74765e-28	9
NRBF2	3.36472e-31	0.262641	0.407	0.268	7.37682e-27	9
FOXO3	4.96947e-31	0.270268	0.74	0.595	1.08951e-26	9
TPM3	5.28807e-31	0.337162	0.554	0.47	1.15936e-26	9
ATP1A1	1.41834e-30	0.292724	0.596	0.427	3.10956e-26	9
USP53	6.27924e-30	0.267601	0.681	0.504	1.37666e-25	9
MYL6B	6.61813e-30	0.338377	0.493	0.362	1.45096e-25	9
ARRDC2	1.11382e-29	0.258698	0.331	0.188	2.44193e-25	9
PRKAR1A	1.38761e-29	0.269764	0.605	0.455	3.04219e-25	9
C4orf3	3.40253e-29	0.254373	0.76	0.677	7.4597e-25	9
RGS2	6.09284e-26	0.339538	0.3	0.17	1.33579e-21	9

## Sheet: Cluster 9
gene	p_val	avg_logFC	pct.1	pct.2	p_val_adj	cluster
TNNC2	0	4.95778	0.993	0.057	0	9
TNNI2	0	4.33089	0.996	0.027	0	9
TNNT3	0	4.27598	0.997	0.045	0	9
MYLPF	0	4.18749	0.993	0.044	0	9
TTN	0	4.0715	0.993	0.038	0	9
MYL1	0	4.03373	0.999	0.034	0	9
CKM	0	3.95173	0.996	0.049	0	9
TNNC1	0	3.40427	0.905	0.023	0	9
MB	0	3.39148	0.957	0.033	0	9
COX6A2	0	3.39144	0.987	0.119	0	9
NEB	0	3.22629	0.989	0.464	0	9
MYOZ1	0	3.18424	0.981	0.013	0	9
ACTA1	0	3.16817	0.935	0.074	0	9
CA3	0	3.16037	0.986	0.277	0	9
TNNI1	0	2.92648	0.935	0.02	0	9
TPM1	0	2.79278	0.986	0.477	0	9
S100A1	0	2.76642	0.937	0.035	0	9
MYBPC1	0	2.64007	0.971	0.04	0	9
ENO3	0	2.57703	0.936	0.042	0	9
RRAD	0	2.53219	0.856	0.076	0	9
DES	0	2.4419	0.998	0.735	0	9
MYH2	0	2.38591	0.739	0.006	0	9
TPM2	0	2.36376	0.991	0.591	0	9
FHL1	0	2.32186	0.952	0.28	0	9
NEXN	0	2.31975	0.922	0.084	0	9
TCAP	0	2.29366	0.939	0.193	0	9
SLN	0	2.24333	0.881	0.076	0	9
GAMT	0	2.20515	0.968	0.207	0	9
BIN1	0	2.19656	0.952	0.121	0	9
CSRP3	0	2.18221	0.871	0.004	0	9
SAA1	0	2.161	0.472	0.001	0	9
CMYA5	0	2.15009	0.927	0.059	0	9
TNNT1	0	2.14701	0.284	0.023	0	9
ACTC1	0	2.05152	0.803	0.045	0	9
MYBPC2	0	2.01869	0.813	0.003	0	9
IL32	0	1.95679	0.954	0.423	0	9
TRIM63	0	1.92086	0.858	0.003	0	9
EEF1A2	0	1.9109	0.639	0.005	0	9
CALML6	0	1.8669	0.815	0.002	0	9
PDLIM5	0	1.86349	0.94	0.126	0	9
RAMP1	0	1.78537	0.894	0.005	0	9
XIRP2	0	1.7536	0.809	0.003	0	9
MEF2C	0	1.72956	0.91	0.174	0	9
ACTN2	0	1.69061	0.892	0.023	0	9
PGAM2	0	1.65967	0.834	0.026	0	9
PDE4DIP	0	1.63378	0.888	0.178	0	9
HSPB3	0	1.63093	0.787	0.003	0	9
HSPB1	0	1.61682	0.989	0.72	0	9
MAP3K7CL	0	1.59731	0.798	0.082	0	9
FGGY	0	1.58385	0.84	0.125	0	9
LMOD2	0	1.58111	0.686	0.002	0	9
CRYAB	0	1.57728	1	0.868	0	9
YBX3	0	1.5717	1	0.9	0	9
TMEM52	0	1.5464	0.79	0.018	0	9
ART3	0	1.53287	0.847	0.002	0	9
RP11-451G4.2	0	1.50894	0.621	0.003	0	9
PEBP4	0	1.50337	0.808	0.015	0	9
PDK4	0	1.50315	0.949	0.491	0	9
CKB	0	1.48613	0.735	0.048	0	9
AK1	0	1.4692	0.924	0.44	0	9
PDLIM3	0	1.42047	0.976	0.618	0	9
CASQ2	0	1.39603	0.763	0.003	0	9
MT1X	0	1.39433	0.997	0.985	0	9
FAM134B	0	1.37577	0.689	0.022	0	9
ETS2	0	1.37563	0.785	0.138	0	9
TXLNB	0	1.37464	0.791	0.029	0	9
SYNPO2	0	1.36362	0.828	0.211	0	9
SMPX	0	1.35734	0.713	0.002	0	9
HSPB6	0	1.34073	0.779	0.103	0	9
ATPIF1	0	1.32878	0.952	0.659	0	9
MYH8	0	1.32494	0.419	0.007	0	9
KLHL40	0	1.31501	0.755	0.01	0	9
PTP4A3	0	1.30992	0.753	0.064	0	9
NRAP	0	1.27469	0.706	0.002	0	9
UQCR11.1	0	1.26284	0.462	0.038	0	9
RPL3L	0	1.25254	0.736	0.006	0	9
ATP2A1	0	1.25076	0.546	0.006	0	9
KLHL41	0	1.25028	0.953	0.575	0	9
COX7A1	0	1.25015	0.98	0.76	0	9
SVIL	0	1.24272	0.881	0.285	0	9
MYOT	0	1.24126	0.725	0.034	0	9
XIRP1	0	1.24023	0.536	0.013	0	9
HSPB8	0	1.22378	0.78	0.046	0	9
SLC25A4	0	1.20366	0.823	0.266	0	9
IGF2	0	1.19953	0.436	0.019	0	9
HSPB7	0	1.19464	0.708	0.032	0	9
TMEM38A	0	1.16517	0.751	0.118	0	9
APOBEC2	0	1.15346	0.653	0.024	0	9
CACNG1	0	1.14947	0.704	0.001	0	9
LDB3	0	1.14487	0.692	0.007	0	9
TRDN	0	1.13088	0.99	0.705	0	9
CALM1	0	1.1249	0.979	0.835	0	9
CTD-2545M3.8	0	1.12033	0.689	0.011	0	9
FBXO32	0	1.0953	0.639	0.174	0	9
MURC	0	1.09518	0.541	0.002	0	9
DCXR	0	1.09483	0.809	0.33	0	9
FXYD1	0	1.06961	0.959	0.694	0	9
ABRA	0	1.06434	0.516	0.001	0	9
LMOD3	0	1.05871	0.635	0.025	0	9
STAC3	0	1.05623	0.956	0.648	0	9
FST	0	1.05364	0.543	0.075	0	9
RBM24	0	1.03938	0.595	0.019	0	9
ARPP21	0	1.03416	0.642	0.023	0	9
CASQ1	0	1.02405	0.576	0.002	0	9
ADSSL1	0	1.01724	0.656	0.044	0	9
PACSIN3	0	1.01641	0.72	0.138	0	9
PCNT	0	1.0147	0.687	0.106	0	9
DMD	0	1.01284	0.697	0.112	0	9
RYR1	0	1.01144	0.674	0.045	0	9
CAP2	0	1.00523	0.67	0.035	0	9
MYH1	0	0.990214	0.292	0.015	0	9
PTP4A1	0	0.981093	0.728	0.135	0	9
CPE	0	0.967274	0.555	0.025	0	9
SLC25A33	0	0.954584	0.622	0.101	0	9
ANKRD23	0	0.950232	0.621	0.007	0	9
ATP2A2	0	0.948454	0.662	0.164	0	9
GAPDH	0	0.922625	0.998	0.991	0	9
PPP1R27	0	0.919246	0.428	0.006	0	9
SCN1B	0	0.918122	0.634	0.135	0	9
PFKM	0	0.912443	0.664	0.128	0	9
SLPI	0	0.911202	0.303	0	0	9
CACNB1	0	0.894688	0.604	0.031	0	9
PGM1	0	0.890369	0.687	0.198	0	9
ARG2	0	0.885466	0.432	0.02	0	9
MAP4	0	0.884372	0.837	0.492	0	9
RPLP1	0	0.86807	1	1	0	9
PRKAA2	0	0.865329	0.626	0.053	0	9
MLTK	0	0.865084	0.361	0.01	0	9
KLF5	0	0.86272	0.637	0.145	0	9
HSPB2	0	0.861504	0.762	0.26	0	9
FITM1	0	0.860523	0.803	0.349	0	9
AMPD1	0	0.858107	0.556	0.001	0	9
CAMK2B	0	0.845096	0.596	0.004	0	9
RBFOX1	0	0.843045	0.605	0.034	0	9
TRIM54	0	0.840634	0.572	0.001	0	9
CDC42EP3	0	0.835591	0.63	0.199	0	9
LMO7	0	0.822731	0.574	0.074	0	9
COBL	0	0.80873	0.495	0.004	0	9
HRC	0	0.808315	0.567	0.002	0	9
TCEA3	0	0.805765	0.89	0.566	0	9
MALAT1	0	0.798236	1	1	0	9
PRDX6	0	0.783661	0.942	0.781	0	9
LINC01497	0	0.77945	0.292	0.007	0	9
MSI2	0	0.774291	0.59	0.116	0	9
MYOG	0	0.7727	0.4	0.011	0	9
UBAC1	0	0.770024	0.709	0.311	0	9
ALDOA	0	0.757517	0.977	0.896	0	9
SRPK3	0	0.757062	0.608	0.147	0	9
MYOZ2	0	0.75275	0.381	0.005	0	9
MYOM1	0	0.752205	0.531	0.005	0	9
CAPN3	0	0.746635	0.508	0.016	0	9
YBX1	0	0.743123	0.984	0.944	0	9
OBSCN	0	0.742499	0.519	0.008	0	9
LIMCH1	0	0.739956	0.585	0.111	0	9
LRRC2	0	0.739826	0.539	0.06	0	9
SYNPO2L	0	0.738175	0.514	0.007	0	9
RTN4	0	0.707469	0.935	0.815	0	9
NDUFA4	0	0.70669	0.978	0.902	0	9
PMAIP1	0	0.69621	0.459	0.032	0	9
ADPRHL1	0	0.690946	0.403	0.031	0	9
FAM129A	0	0.683438	0.495	0.047	0	9
ITGA10	0	0.672313	0.357	0.013	0	9
SYNM	0	0.665228	0.442	0.011	0	9
SMYD1	0	0.659491	0.477	0.003	0	9
GMPR	0	0.659309	0.511	0.04	0	9
ATP5G2	0	0.657837	0.978	0.92	0	9
JPH1	0	0.65609	0.508	0.046	0	9
TMOD1	0	0.624674	0.48	0.028	0	9
COL19A1	0	0.618106	0.376	0.005	0	9
UNC45B	0	0.612253	0.459	0.002	0	9
MIR133A1HG	0	0.608423	0.291	0.001	0	9
FABP3	0	0.580486	0.372	0.003	0	9
SEMA6C	0	0.57545	0.467	0.05	0	9
PPP1R3A	0	0.5746	0.393	0	0	9
DEPTOR	0	0.574153	0.42	0.01	0	9
DUSP26	0	0.569472	0.436	0.026	0	9
ANK3	0	0.555599	0.429	0.034	0	9
SLC7A6	0	0.544946	0.412	0.012	0	9
SCN3B	0	0.520397	0.356	0.011	0	9
DNAH11	0	0.497068	0.345	0.001	0	9
ARHGAP36	0	0.487468	0.346	0	0	9
GPD1	0	0.482262	0.345	0.002	0	9
POPDC2	0	0.480713	0.366	0.014	0	9
SGCG	0	0.480417	0.368	0.001	0	9
INPP4B	0	0.456935	0.336	0.005	0	9
MYOM3	0	0.452128	0.309	0.004	0	9
TMEM182	0	0.442965	0.332	0.007	0	9
SMTNL1	0	0.431783	0.285	0	0	9
PLN	0	0.419361	0.302	0.004	0	9
HHATL	0	0.417629	0.312	0.002	0	9
TP63	0	0.414282	0.333	0.004	0	9
CACNA1S	0	0.408361	0.296	0.003	0	9
LINC00475	0	0.407171	0.269	0.004	0	9
BTNL8	0	0.406088	0.265	0	0	9
LINC01372	0	0.363938	0.27	0.002	0	9
LRRC39	0	0.362408	0.262	0.002	0	9
SOX7	1.28457067918724e-322	0.484737	0.318	0.012	2.81629275705011e-318	9
FHL3	3.5835177877133e-315	0.814464	0.692	0.306	7.85650439778263e-311	9
COX17	1.58421164162711e-312	0.768926	0.813	0.408	3.47323e-308	9
CACNG6	3.86325187849456e-312	0.31593	0.264	0.005	8.46979e-308	9
ELN	5.13231570967436e-311	0.669432	0.432	0.044	1.12521e-306	9
NHLH2	0	0.36228	0.256	0.005	3.41086e-304	9
PKDCC	1.06134e-305	0.662469	0.472	0.065	2.32687e-301	9
SNX7	8.95311e-305	0.707038	0.621	0.167	1.96288e-300	9
LRRK2	2.13465e-302	0.657645	0.409	0.044	4.68001e-298	9
COX5A	4.19859e-302	0.694192	0.856	0.551	9.20499e-298	9
EFCAB7	2.83529e-296	0.550919	0.441	0.049	6.21609e-292	9
LMCD1	5.96833e-294	0.817636	0.575	0.165	1.3085e-289	9
EHBP1L1	7.48031e-294	0.598415	0.509	0.082	1.63998e-289	9
MRP63	2.99962e-291	0.53256	0.291	0.018	6.57637e-287	9
ANGPT2	2.11303e-290	0.506968	0.319	0.017	4.63261e-286	9
UQCR10	2.36928e-289	0.685734	0.891	0.638	5.19442e-285	9
MYF6	8.61961e-289	0.803884	0.88	0.677	1.88976e-284	9
ARID5B	4.85852e-288	0.993897	0.877	0.642	1.06518e-283	9
BEST3	1.10909e-280	0.718744	0.671	0.21	2.43157e-276	9
GADD45G	5.14594e-280	1.21158	0.807	0.338	1.1282e-275	9
DUSP27	2.69864e-279	0.461065	0.38	0.032	5.9165e-275	9
CDKN1A	1.19502e-276	0.831283	0.853	0.471	2.61996e-272	9
MYOM2	1.71753e-273	0.462349	0.374	0.03	3.76551e-269	9
NEAT1	1.51257e-271	0.804386	0.97	0.803	3.31617e-267	9
SETD5-AS1	1.92766e-271	0.767168	0.354	0.03	4.2262e-267	9
ABLIM2	1.99708e-270	0.443184	0.348	0.025	4.3784e-266	9
UTP11L	5.71116e-266	0.748591	0.675	0.237	1.25211e-261	9
TLE1	7.18392e-266	0.627561	0.507	0.084	1.575e-261	9
AC013461.1	4.02513e-265	0.655273	0.456	0.265	8.8247e-261	9
KIF1B	2.9001e-264	0.700349	0.636	0.209	6.35817e-260	9
OTUD1	7.59784e-261	0.912707	0.516	0.196	1.66575e-256	9
CPEB4	7.60125e-259	0.678929	0.596	0.162	1.6665e-254	9
TRIM55	1.35544e-258	0.582186	0.512	0.096	2.97166e-254	9
NHP2L1	1.50543e-257	0.438661	0.304	0.039	3.3005e-253	9
CORO6	1.11617e-255	0.691808	0.622	0.186	2.4471e-251	9
PHPT1	2.1428e-253	0.689181	0.874	0.603	4.69787e-249	9
GPRC5C	1.03862e-252	0.455669	0.361	0.032	2.27707e-248	9
OSBPL1A	7.41041e-246	0.704506	0.608	0.215	1.62466e-241	9
TMEM38B	1.83133e-244	0.549536	0.49	0.087	4.01501e-240	9
ADCY2	4.59464e-244	0.382127	0.326	0.024	1.00733e-239	9
CCDC57	6.37826e-243	0.621966	0.476	0.106	1.39837e-238	9
FAM184B	9.38198e-243	0.37563	0.288	0.017	2.05691e-238	9
C19orf47	2.38633e-242	0.453014	0.386	0.043	5.23178e-238	9
PDLIM7	1.09933e-240	0.581444	0.457	0.079	2.41018e-236	9
GADD45A	2.54088e-240	0.884114	0.808	0.54	5.57063e-236	9
ADIRF	5.1352e-240	0.730641	0.972	0.932	1.12584e-235	9
AGL	1.68184e-234	0.594824	0.461	0.093	3.68727e-230	9
TEAD4	4.25804e-234	0.319719	0.256	0.012	9.33532e-230	9
UBC	8.59223e-234	0.610518	1	0.99	1.88376e-229	9
ANK1	5.02147e-232	0.703389	0.684	0.253	1.10091e-227	9
MAFA	1.9364e-231	0.562758	0.384	0.053	4.24536e-227	9
HSF2	2.68436e-230	0.588082	0.518	0.121	5.88519e-226	9
FILIP1	8.27927e-226	0.714846	0.717	0.288	1.81515e-221	9
CARNS1	3.17052e-225	0.315741	0.262	0.014	6.95105e-221	9
EMC10	5.19582e-224	0.730586	0.561	0.258	1.13913e-219	9
PPP1R12B	1.40698e-223	0.522181	0.437	0.073	3.08466e-219	9
BLCAP	8.94806e-222	0.614264	0.504	0.138	1.96177e-217	9
UBE2G1	1.30932e-220	0.56313	0.513	0.116	2.87054e-216	9
EEF2	1.48777e-220	0.492783	0.994	0.956	3.26178e-216	9
MLIP	6.39078e-220	0.462363	0.426	0.066	1.40111e-215	9
ATP1A2	4.64534e-219	0.705409	0.655	0.267	1.01844e-214	9
KIAA1217	8.52035e-219	0.519053	0.451	0.083	1.868e-214	9
OSBPL6	2.96785e-217	0.528312	0.421	0.069	6.50672e-213	9
MIDN	1.64801e-215	0.793112	0.723	0.4	3.61311e-211	9
PSMA2.1	8.44182e-214	0.406276	0.256	0.031	1.85078e-209	9
PYGM	9.53094e-212	0.550555	0.423	0.087	2.08956e-207	9
SF3B14	1.48968e-210	0.41213	0.281	0.042	3.26596e-206	9
CES2	7.79542e-210	0.594102	0.485	0.126	1.70907e-205	9
NDUFB9	7.20405e-209	0.574248	0.925	0.759	1.57942e-204	9
IDH2	1.1843e-206	0.620365	0.739	0.369	2.59647e-202	9
CYB5R1	7.41669e-205	0.638828	0.728	0.388	1.62603e-200	9
FEM1A	4.26148e-204	0.449158	0.414	0.067	9.34287e-200	9
C1orf63	2.81522e-200	0.275998	0.255	0.045	6.17208e-196	9
SNTA1	5.59022e-200	0.534972	0.494	0.124	1.2256e-195	9
FDXR	1.02771e-199	0.46226	0.373	0.053	2.25316e-195	9
ACHE	4.53099e-199	0.468806	0.388	0.06	9.93374e-195	9
PKIA	1.1286e-198	0.51242	0.444	0.092	2.47435e-194	9
RPS27L	5.10812e-198	0.596517	0.893	0.663	1.1199e-193	9
LGI4	8.83781e-196	0.449338	0.4	0.064	1.9376e-191	9
DUSP23	1.4004e-193	0.613518	0.51	0.159	3.07023e-189	9
SMG1	8.57868e-193	0.608356	0.556	0.196	1.88079e-188	9
MT2A	1.32185e-187	1.20142	0.985	0.971	2.89803e-183	9
PDE4B	8.26331e-187	0.652871	0.504	0.175	1.81165e-182	9
USP54	2.43102e-183	0.450673	0.41	0.075	5.32977e-179	9
TRIM7	2.88891e-182	0.517407	0.454	0.11	6.33365e-178	9
SPPL2A	2.14182e-180	0.574427	0.665	0.341	4.69572e-176	9
PPP1R3C	7.17164e-179	0.364646	0.251	0.021	1.57231e-174	9
ABCA5	1.59504e-178	0.477612	0.442	0.094	3.49696e-174	9
CACNA2D1	2.53783e-178	0.382973	0.333	0.045	5.56394e-174	9
CEBPA	4.18445e-178	0.393051	0.255	0.023	9.17399e-174	9
MBNL1-AS1	3.61921e-175	0.329871	0.263	0.023	7.93477e-171	9
NFE2L1	7.80113e-175	0.535199	0.535	0.168	1.71032e-170	9
PPDPF	4.37655e-171	0.538897	0.909	0.751	9.59516e-167	9
DNAJB5	7.08615e-167	0.350391	0.307	0.04	1.55357e-162	9
MYOD1	7.67728e-167	0.467246	0.371	0.066	1.68317e-162	9
SH3BGR	1.79115e-166	0.499924	0.415	0.096	3.92691e-162	9
FSD1L	3.39642e-165	0.326012	0.273	0.029	7.44632e-161	9
MATR3	1.82521e-163	0.373529	0.267	0.036	4.00159e-159	9
RPL37A	5.04169e-163	0.351602	1	0.999	1.10534e-158	9
ECH1	1.27144e-162	0.541929	0.795	0.565	2.78751e-158	9
CFL2	2.15185e-162	0.562136	0.757	0.485	4.71771e-158	9
COX14	9.01787e-162	0.556583	0.648	0.286	1.97708e-157	9
AKAP6	1.1229e-161	0.354783	0.324	0.049	2.46185e-157	9
CSDE1	3.76364e-161	0.48999	0.859	0.731	8.2514e-157	9
MDM2	1.92708e-160	0.500395	0.423	0.106	4.22494e-156	9
MAST4	3.14485e-160	0.472453	0.325	0.059	6.89477e-156	9
BBC3	3.63775e-160	0.500948	0.409	0.097	7.97541e-156	9
UQCRQ	4.75199e-158	0.551472	0.87	0.646	1.04183e-153	9
TGFB1	6.00133e-158	0.463714	0.351	0.067	1.31573e-153	9
KPNA3	3.77186e-157	0.478219	0.519	0.16	8.26943e-153	9
BEX2	8.34599e-156	0.587864	0.597	0.221	1.82978e-151	9
RRAGD	1.2602e-155	0.359067	0.35	0.061	2.76286e-151	9
USP13	6.32497e-155	0.365071	0.349	0.061	1.38669e-150	9
ADI1	3.34866e-151	0.560525	0.63	0.272	7.34161e-147	9
EIF1AY	2.05636e-142	0.474234	0.518	0.17	4.50837e-138	9
RNF115	1.68108e-141	0.537903	0.65	0.322	3.68559e-137	9
FXR1	2.13053e-138	0.488912	0.781	0.573	4.67097e-134	9
SLC16A10	3.19288e-137	0.297203	0.276	0.039	7.00008e-133	9
BAG3	1.79432e-136	0.582145	0.669	0.321	3.93386e-132	9
FLNC	6.55758e-134	0.519383	0.597	0.257	1.43768e-129	9
CMBL	2.56383e-132	0.537869	0.588	0.289	5.62094e-128	9
TACC2	2.95253e-132	0.339739	0.366	0.081	6.47313e-128	9
PERP	1.45515e-131	0.444353	0.339	0.073	3.19028e-127	9
BHLHE40	3.17251e-130	0.536128	0.549	0.214	6.95541e-126	9
PRUNE2	7.71224e-129	0.496015	0.446	0.134	1.69083e-124	9
CAV3	1.01903e-128	0.45733	0.454	0.149	2.23412e-124	9
PKIG	1.4933e-128	0.452451	0.413	0.119	3.27391e-124	9
DIAPH1	2.88567e-125	0.345905	0.361	0.084	6.32654e-121	9
UQCC2	3.85976e-125	0.454191	0.496	0.175	8.46213e-121	9
ATP1B1	3.91783e-125	0.59852	0.695	0.4	8.58945e-121	9
RPL23A	6.80312e-125	0.392083	0.995	0.997	1.49152e-120	9
PLA2G15	8.75751e-125	0.265363	0.263	0.039	1.92e-120	9
RBM8A	1.24298e-124	0.486262	0.889	0.726	2.72512e-120	9
FAM174B	9.26365e-124	0.261118	0.254	0.037	2.03096e-119	9
TCEB2	1.37284e-123	0.413293	0.947	0.829	3.00982e-119	9
NDUFB11	1.90751e-123	0.448287	0.876	0.697	4.18202e-119	9
LMO2	3.6143e-123	0.528772	0.414	0.157	7.92399e-119	9
RAPH1	2.47768e-122	0.351818	0.322	0.068	5.43207e-118	9
TSPAN7	5.04409e-122	0.363308	0.357	0.083	1.10587e-117	9
PLEC	6.76077e-122	0.443742	0.539	0.207	1.48223e-117	9
S100A13	2.32102e-121	0.565542	0.855	0.733	5.08859e-117	9
LPIN1	6.46407e-121	0.431811	0.379	0.105	1.41718e-116	9
TAF7	7.22244e-121	0.466533	0.854	0.683	1.58345e-116	9
ADAMTSL4	4.73348e-120	0.276766	0.272	0.045	1.03777e-115	9
ACYP2	2.02531e-119	0.418056	0.49	0.17	4.44028e-115	9
HRAS	2.63652e-118	0.424292	0.459	0.169	5.7803e-114	9
DCAF6	1.60066e-117	0.366769	0.424	0.125	3.50929e-113	9
MAP1LC3B	2.37389e-117	0.506602	0.787	0.577	5.20451e-113	9
RPS25	4.61514e-117	0.269778	0.995	0.998	1.01182e-112	9
ASB8	6.28298e-117	0.476814	0.588	0.279	1.37748e-112	9
RORA	1.5341e-116	0.495044	0.56	0.257	3.36337e-112	9
DTNA	2.0419e-116	0.313037	0.313	0.065	4.47666e-112	9
SYNGR2	1.04849e-115	0.391486	0.447	0.142	2.29872e-111	9
ERRFI1	6.70726e-113	0.594557	0.542	0.242	1.4705e-108	9
ARHGAP10	2.79513e-112	0.38436	0.423	0.132	6.12804e-108	9
ADSL	6.93635e-111	0.438361	0.567	0.252	1.52072e-106	9
CUTC	1.02113e-109	0.420627	0.498	0.194	2.23872e-105	9
MYL5	4.45737e-109	0.491653	0.389	0.161	9.77235e-105	9
PM20D2	6.64977e-108	0.366106	0.374	0.107	1.45789e-103	9
NRG2	8.75947e-107	0.397585	0.347	0.099	1.92043e-102	9
STIM1	2.00812e-106	0.302275	0.303	0.067	4.4026e-102	9
UBE2D1	9.99829e-106	0.40051	0.483	0.177	2.19203e-101	9
PSMD4	1.15051e-105	0.441937	0.766	0.512	2.52239e-101	9
MTSS1	1.32115e-104	0.361029	0.405	0.126	2.8965e-100	9
PITX2	5.23634e-104	0.476177	0.515	0.22	1.14802e-99	9
GYG1	4.93562e-103	0.440894	0.508	0.21	1.08209e-98	9
TFEB	9.19323e-103	0.350044	0.394	0.12	2.01552e-98	9
AMOTL1	1.21244e-99	0.3029	0.302	0.07	2.65815e-95	9
TUBA4A	3.2122e-98	0.350232	0.361	0.104	7.04242e-94	9
UCP2	5.63596e-98	0.300325	0.292	0.067	1.23563e-93	9
RAD23A	6.75942e-98	0.413708	0.808	0.636	1.48193e-93	9
VCL	2.15849e-97	0.392455	0.416	0.147	4.73227e-93	9
PRRX1	1.12274e-95	0.433566	0.524	0.226	2.46149e-91	9
ALPK3	1.40749e-95	0.345737	0.388	0.125	3.08578e-91	9
SPAG7	2.01671e-94	0.441257	0.678	0.407	4.42143e-90	9
KLF10	2.85948e-94	0.572631	0.658	0.397	6.26913e-90	9
NDUFS7	6.58442e-94	0.420012	0.732	0.502	1.44357e-89	9
PPP1R14C	1.80066e-93	0.456477	0.655	0.4	3.94776e-89	9
UBE2B	2.52268e-92	0.391289	0.803	0.651	5.53073e-88	9
MT-CO1	9.37863e-92	0.315162	0.995	0.999	2.05617e-87	9
MAGED2	6.24917e-91	0.423498	0.764	0.604	1.37007e-86	9
CLTB	1.20515e-90	0.400659	0.668	0.383	2.64217e-86	9
CEBPG	1.51697e-90	0.253854	0.289	0.07	3.3258e-86	9
CFLAR	3.87952e-90	0.442658	0.615	0.336	8.50546e-86	9
POLR2L	1.14541e-89	0.43505	0.846	0.647	2.51121e-85	9
ADCK3	4.26505e-88	0.39786	0.485	0.219	9.3507e-84	9
GAS6	1.74116e-87	0.340464	0.442	0.166	3.81732e-83	9
DMPK	2.67022e-87	0.356191	0.434	0.165	5.85419e-83	9
SYNC	1.95294e-86	0.330311	0.383	0.13	4.28163e-82	9
PLIN3	1.20523e-85	0.424274	0.564	0.344	2.64235e-81	9
MKNK2	1.78814e-85	0.475447	0.729	0.507	3.92032e-81	9
C2orf88	1.98686e-85	0.2951	0.257	0.06	4.35599e-81	9
AKAP1	3.93146e-85	0.322474	0.377	0.126	8.61934e-81	9
PPP2R3A	4.02522e-85	0.285999	0.33	0.097	8.8249e-81	9
HES6	6.68648e-85	0.484137	0.392	0.149	1.46594e-80	9
NRIP1	1.20379e-84	0.40239	0.514	0.249	2.63918e-80	9
NDUFS5	1.96188e-84	0.342337	0.942	0.892	4.30123e-80	9
ANAPC11	2.31836e-84	0.403781	0.752	0.514	5.08276e-80	9
FIS1	5.06983e-84	0.379789	0.87	0.735	1.11151e-79	9
FHL2	1.05108e-83	0.428879	0.426	0.189	2.30439e-79	9
PPP2R3B	2.87244e-83	0.293776	0.352	0.113	6.29754e-79	9
HSDL2	3.61117e-83	0.32095	0.406	0.149	7.91712e-79	9
KIAA1715	3.77521e-83	0.376623	0.395	0.15	8.27677e-79	9
MAP7D1	9.68442e-82	0.378111	0.513	0.242	2.12321e-77	9
DGCR6	2.37132e-81	0.388214	0.4	0.147	5.19888e-77	9
BTBD1	6.11283e-81	0.274959	0.334	0.103	1.34018e-76	9
SEC14L1	1.40147e-80	0.348847	0.421	0.166	3.07258e-76	9
FDFT1	1.43608e-80	0.319256	0.323	0.101	3.14846e-76	9
CCNG1	9.65623e-80	0.401172	0.543	0.27	2.11703e-75	9
UQCRC1	2.81413e-79	0.359518	0.582	0.297	6.1697e-75	9
SELK	5.34274e-79	0.39186	0.811	0.618	1.17134e-74	9
CTNNAL1	8.91823e-79	0.26619	0.332	0.104	1.95523e-74	9
MID1IP1	9.55672e-79	0.460576	0.459	0.262	2.09522e-74	9
SGK1	1.77365e-78	0.39849	0.383	0.141	3.88855e-74	9
SSH2	2.83063e-78	0.380496	0.437	0.191	6.20588e-74	9
HINT1	3.32116e-78	0.33557	0.905	0.797	7.28131e-74	9
LINC00844	5.59146e-78	0.392424	0.313	0.1	1.22587e-73	9
PLCD3	3.31992e-77	0.338143	0.352	0.127	7.27859e-73	9
SESN1	1.25662e-76	0.40328	0.521	0.264	2.75501e-72	9
NDUFC1	1.94117e-76	0.353816	0.836	0.678	4.25583e-72	9
ADRM1	2.17228e-76	0.364558	0.574	0.318	4.76251e-72	9
PARD3	2.06531e-75	0.307958	0.356	0.125	4.52798e-71	9
STARD7	1.27855e-74	0.36339	0.454	0.209	2.80309e-70	9
GBE1	3.63826e-73	0.322363	0.459	0.199	7.97651e-69	9
PLA2G4C	9.08648e-73	0.260084	0.326	0.107	1.99212e-68	9
NDUFA1	3.16431e-72	0.362153	0.872	0.744	6.93744e-68	9
RPS16	7.25509e-72	0.258869	0.996	0.997	1.59061e-67	9
MGST3	1.56875e-71	0.336433	0.878	0.8	3.43933e-67	9
PSMA7	3.03763e-71	0.323933	0.886	0.772	6.65969e-67	9
TNFRSF12A	9.32005e-71	0.362817	0.372	0.138	2.04333e-66	9
MRPS6	9.45602e-71	0.295629	0.378	0.143	2.07314e-66	9
MKRN1	6.78522e-70	0.357656	0.507	0.26	1.48759e-65	9
HADH	2.6689e-69	0.290314	0.437	0.186	5.8513e-65	9
PNISR	2.68338e-69	0.346847	0.868	0.741	5.88304e-65	9
HIGD2A	2.94955e-69	0.381104	0.822	0.672	6.46659e-65	9
LACTB	1.50737e-67	0.26959	0.317	0.107	3.30476e-63	9
ZNF106	2.07902e-67	0.410026	0.667	0.454	4.55805e-63	9
GLUL	4.30215e-67	0.517479	0.886	0.828	9.43203e-63	9
AKAP9	2.85465e-66	0.373203	0.762	0.635	6.25853e-62	9
SNRNP25	3.79588e-66	0.305587	0.461	0.212	8.32208e-62	9
TOMM7	1.1943e-65	0.260159	0.985	0.978	2.61838e-61	9
ZNRF1	8.10165e-65	0.281614	0.329	0.121	1.7762e-60	9
PPP2R1A	1.31833e-64	0.300767	0.512	0.254	2.8903e-60	9
ATP5J2	2.32217e-64	0.333498	0.86	0.704	5.09113e-60	9
MYL12A	1.91632e-63	0.3679	0.916	0.863	4.20134e-59	9
STOM	2.87542e-63	0.362117	0.498	0.265	6.30406e-59	9
LRRC28	5.0269e-62	0.252493	0.284	0.094	1.1021e-57	9
FKBP3	1.42677e-61	0.347536	0.597	0.35	3.12805e-57	9
CNBP	8.92097e-61	0.275993	0.943	0.898	1.95583e-56	9
TNS1	1.85202e-60	0.278638	0.314	0.117	4.06037e-56	9
EIF4E2	4.23473e-60	0.32522	0.559	0.317	9.28423e-56	9
NDUFA3	4.76215e-60	0.36312	0.681	0.454	1.04405e-55	9
PPP1R2	6.03272e-60	0.340485	0.476	0.241	1.32261e-55	9
TUBB	1.87853e-59	0.344809	0.806	0.645	4.1185e-55	9
SMAD3	1.06107e-58	0.268438	0.366	0.15	2.32629e-54	9
RAB10	1.11767e-58	0.376559	0.619	0.432	2.45037e-54	9
PREPL	4.72877e-57	0.271085	0.43	0.201	1.03673e-52	9
DUSP13	6.2837e-57	0.303119	0.392	0.177	1.37764e-52	9
PSMC3	1.06955e-56	0.330014	0.704	0.499	2.34487e-52	9
SERTAD3	1.26882e-56	0.323858	0.438	0.213	2.78176e-52	9
NAA50	1.69443e-56	0.302213	0.425	0.2	3.71487e-52	9
MEF2D	2.35176e-56	0.258659	0.408	0.184	5.156e-52	9
PSMB5	3.19144e-56	0.33151	0.709	0.503	6.9969e-52	9
DDB1	3.27397e-56	0.288856	0.428	0.202	7.17786e-52	9
KIF1C	3.67426e-56	0.252312	0.33	0.13	8.05544e-52	9
PDHA1	3.89968e-56	0.311541	0.532	0.3	8.54967e-52	9
SMIM4	2.37503e-55	0.301094	0.387	0.176	5.20701e-51	9
MACROD1	5.26191e-55	0.301827	0.592	0.349	1.15362e-50	9
NDUFB10	6.26079e-55	0.309006	0.839	0.737	1.37262e-50	9
ANKRD9	1.40739e-54	0.329746	0.374	0.194	3.08557e-50	9
H2AFJ	1.58425e-54	0.345765	0.604	0.384	3.47332e-50	9
DGKD	2.19075e-54	0.260781	0.327	0.13	4.803e-50	9
ACO2	5.0561e-54	0.256042	0.416	0.195	1.1085e-49	9
U2AF1	5.11154e-54	0.269494	0.419	0.197	1.12065e-49	9
USO1	1.05959e-53	0.281744	0.47	0.239	2.32305e-49	9
MCL1	1.2306e-53	0.350232	0.779	0.606	2.69797e-49	9
FAM207A	1.85683e-53	0.260803	0.39	0.177	4.07091e-49	9
NDUFB2	4.69752e-53	0.327161	0.767	0.613	1.02988e-48	9
FKBP5	6.22582e-53	0.319561	0.824	0.604	1.36495e-48	9
CDC37L1	1.03433e-52	0.294326	0.404	0.194	2.26767e-48	9
GGT7	2.24069e-52	0.305512	0.29	0.121	4.91249e-48	9
PTPN14	2.8546e-52	0.263806	0.3	0.117	6.25842e-48	9
TP53I3	1.3347e-51	0.282065	0.372	0.17	2.92621e-47	9
YWHAG	2.0405e-51	0.267658	0.451	0.228	4.47359e-47	9
IER5	5.22156e-51	0.380924	0.668	0.496	1.14477e-46	9
ATP5I	5.25821e-51	0.32023	0.904	0.807	1.15281e-46	9
COX5B	9.80177e-51	0.285312	0.92	0.86	2.14894e-46	9
LSM4	3.42118e-50	0.297989	0.527	0.307	7.50059e-46	9
FBXW5	1.79911e-49	0.313119	0.495	0.293	3.94438e-45	9
RPL13A	2.08908e-49	0.442706	0.997	0.996	4.58009e-45	9
COX8A	6.72266e-49	0.295056	0.876	0.765	1.47388e-44	9
ASB5	1.45453e-48	0.258307	0.4	0.192	3.1889e-44	9
KTN1	4.19248e-48	0.304309	0.849	0.714	9.19158e-44	9
NDUFB1	6.427e-48	0.328065	0.811	0.65	1.40905e-43	9
TMEM245	7.07458e-48	0.25143	0.353	0.16	1.55103e-43	9
PSMB6	4.10171e-47	0.279766	0.801	0.663	8.9926e-43	9
MT1E	4.83935e-47	0.855173	0.883	0.902	1.06098e-42	9
HES1	5.82468e-47	0.359896	0.736	0.531	1.277e-42	9
NDUFS4	9.69714e-47	0.291647	0.805	0.648	2.126e-42	9
GBAS	5.74003e-46	0.311165	0.609	0.405	1.25844e-41	9
HTATSF1	8.15349e-46	0.276754	0.484	0.27	1.78757e-41	9
TSPAN3	1.09516e-45	0.31294	0.544	0.374	2.40103e-41	9
WBSCR22	3.66818e-45	0.282648	0.587	0.363	8.04212e-41	9
NDUFA13	8.73467e-45	0.303831	0.749	0.556	1.91499e-40	9
CCSER2	5.62457e-44	0.274909	0.532	0.318	1.23313e-39	9
RBM38	1.46882e-43	0.252441	0.348	0.165	3.22025e-39	9
POLR2I	2.3088e-43	0.288637	0.765	0.606	5.06181e-39	9
ZBTB16	6.50504e-43	0.320702	0.806	0.629	1.42617e-38	9
CLEC2B	1.69692e-42	0.284046	0.414	0.217	3.72033e-38	9
TAX1BP1	2.25325e-42	0.27964	0.658	0.453	4.94002e-38	9
ALDH2	7.66378e-42	0.326866	0.486	0.349	1.68021e-37	9
COX7B	3.6642e-40	0.280345	0.818	0.698	8.03338e-36	9
PLIN2	3.50244e-39	0.290386	0.419	0.235	7.67875e-35	9
PRDX2	4.9561e-39	0.254841	0.811	0.689	1.08657e-34	9
ARRDC3	7.46602e-39	0.255605	0.276	0.122	1.63685e-34	9
NAMPT	2.20078e-38	0.294008	0.555	0.35	4.82499e-34	9
MBNL1	3.81147e-38	0.267852	0.592	0.397	8.35626e-34	9
FADS1	9.01712e-38	0.326786	0.313	0.18	1.97691e-33	9
RPL31	9.50306e-38	0.296653	0.965	0.974	2.08345e-33	9
MRPL33	1.96145e-36	0.273163	0.729	0.564	4.30029e-32	9
HIST1H1C	3.27583e-36	0.354665	0.483	0.299	7.18192e-32	9
MRPL40	3.49957e-36	0.255061	0.626	0.433	7.67245e-32	9
FOSL2	6.18782e-36	0.285565	0.423	0.245	1.35662e-31	9
ASPH	6.79919e-36	0.287585	0.598	0.433	1.49065e-31	9
FAM177A1	1.79231e-35	0.262461	0.487	0.296	3.92946e-31	9
DBI	1.3802e-34	0.323867	0.869	0.815	3.02594e-30	9
AHNAK	2.46792e-34	0.257032	0.838	0.788	5.41067e-30	9
CYSTM1	3.02136e-34	0.298165	0.598	0.43	6.62403e-30	9
STAT3	4.87481e-34	0.267471	0.745	0.588	1.06875e-29	9
JAK1	3.49667e-33	0.257349	0.547	0.371	7.66609e-29	9
NFIL3	6.54504e-33	0.263429	0.51	0.325	1.43493e-28	9
ACADVL	2.62162e-32	0.252726	0.649	0.485	5.74765e-28	9
NRBF2	3.36472e-31	0.262641	0.407	0.268	7.37682e-27	9
FOXO3	4.96947e-31	0.270268	0.74	0.595	1.08951e-26	9
TPM3	5.28807e-31	0.337162	0.554	0.47	1.15936e-26	9
ATP1A1	1.41834e-30	0.292724	0.596	0.427	3.10956e-26	9
USP53	6.27924e-30	0.267601	0.681	0.504	1.37666e-25	9
MYL6B	6.61813e-30	0.338377	0.493	0.362	1.45096e-25	9
ARRDC2	1.11382e-29	0.258698	0.331	0.188	2.44193e-25	9
PRKAR1A	1.38761e-29	0.269764	0.605	0.455	3.04219e-25	9
C4orf3	3.40253e-29	0.254373	0.76	0.677	7.4597e-25	9
RGS2	6.09284e-26	0.339538	0.3	0.17	1.33579e-21	9

[truncated: 7 more sheets: Cluster 10, Cluster 11, Cluster 12, Cluster 13, Cluster 14, Cluster 15, Cluster 16]
