# Supplementary material for: Functionally heterogeneous human satellite cells identified by single cell RNA sequencing
Source: eLife. 2020 Apr 1;9:e51576. doi: 10.7554/eLife.51576 (PMC7164960; doi:10.7554/eLife.51576)
Supplement: Supplementary file 2. [file elife-51576-supp2.xlsx]

## Sheet: Cluster 0
gene	p_val	avg_logFC	pct.1	pct.2	p_val_adj	cluster
CXCL14	3.39271e-80	0.401541	0.952	0.812	4.64937e-76	0
DLK1	1.3282e-77	0.662794	0.717	0.478	1.82017e-73	0
CSRP2	1.15525e-49	0.529312	0.518	0.324	1.58315e-45	0
MGP	3.13095e-41	0.547556	0.514	0.331	4.29066e-37	0
SPARCL1	1.64988e-30	0.268983	0.849	0.756	2.261e-26	0
TXNIP	6.08909e-29	0.297309	0.682	0.536	8.34448e-25	0
MEG3	2.27899e-28	0.295076	0.821	0.747	3.12313e-24	0
MYF6	1.07272e-26	0.342884	0.554	0.427	1.47005e-22	0
HES1	1.69617e-24	0.340317	0.581	0.451	2.32443e-20	0
GNAS	9.28385e-24	0.31016	0.691	0.63	1.27226e-19	0
GNG11	7.73869e-23	0.339265	0.334	0.25	1.06051e-18	0
NDUFB9	1.08245e-22	0.255957	0.504	0.429	1.48338e-18	0
RASD1	2.07061e-22	0.325926	0.567	0.461	2.83756e-18	0
TSC22D1	7.47875e-22	0.281936	0.589	0.473	1.02489e-17	0
CHCHD10	3.41348e-21	0.343781	0.388	0.287	4.67783e-17	0
ALDH1A1	2.08447e-20	0.251624	0.651	0.574	2.85656e-16	0
TPD52L1	5.915e-19	0.297688	0.483	0.371	8.10592e-15	0
RBP1	1.14942e-18	0.254414	0.58	0.5	1.57516e-14	0
TAX1BP3	2.02887e-18	0.290218	0.34	0.258	2.78036e-14	0
IGF1	2.60065e-18	0.350598	0.352	0.249	3.56394e-14	0
CTSD	4.24379e-18	0.261086	0.293	0.248	5.81569e-14	0
RHOB	1.27877e-16	0.255938	0.564	0.49	1.75243e-12	0
AKR1B1	6.18383e-16	0.259554	0.416	0.361	8.47432e-12	0
SIX1	9.2885e-16	0.296863	0.304	0.22	1.2729e-11	0
NFIA	9.40312e-16	0.2547	0.411	0.33	1.2886e-11	0
LAMP1	7.44594e-15	0.254642	0.271	0.214	1.02039e-10	0
SPRY1	1.36344e-14	0.253743	0.438	0.341	1.86845e-10	0
TMEM205	1.4065e-14	0.26691	0.263	0.223	1.92747e-10	0
FRZB	3.70651e-12	0.290289	0.275	0.2	5.0794e-08	0
TGFBI	4.42975e-11	0.263769	0.336	0.252	6.07053e-07	0
GPX3	6.3695e-11	0.25358	0.612	0.537	8.72877e-07	0

## Sheet: Cluster 1
gene	p_val	avg_logFC	pct.1	pct.2	p_val_adj	cluster
JUNB	4.73195e-250	0.746577	0.996	0.884	6.48466e-246	1
DNAJA1	3.56656e-247	1.11922	0.812	0.439	4.88761e-243	1
DNAJB1	1.4019e-233	0.859617	0.963	0.714	1.92117e-229	1
HSPA1A	4.58892e-204	0.710842	0.982	0.772	6.28866e-200	1
FOSB	6.16313e-159	0.872354	0.755	0.47	8.44595e-155	1
HSP90AA1	3.07309e-135	0.649467	0.904	0.731	4.21137e-131	1
HSP90AB1	5.87093e-124	0.469949	0.972	0.926	8.04553e-120	1
HSPA1B	1.33339e-122	0.613535	0.915	0.704	1.82728e-118	1
FOS	7.34219e-111	0.652346	0.919	0.813	1.00617e-106	1
ZFP36	2.26799e-107	0.615908	0.824	0.566	3.10805e-103	1
KLF4	1.62541e-105	0.811819	0.572	0.318	2.22746e-101	1
EIF4A3	4.97558e-92	0.75854	0.51	0.296	6.81854e-88	1
EIF1	3.31711e-83	0.303421	0.999	0.994	4.54577e-79	1
PPP1R15A	2.97657e-82	0.639285	0.634	0.416	4.07909e-78	1
DDX5	1.48583e-77	0.551373	0.729	0.575	2.03618e-73	1
DYNLL1	1.01079e-74	0.5592	0.71	0.538	1.38518e-70	1
GADD45B	6.5557e-74	0.458772	0.9	0.746	8.98393e-70	1
BTG1	3.67249e-72	0.416	0.903	0.827	5.03278e-68	1
HSPH1	5.19725e-72	0.770374	0.352	0.162	7.12231e-68	1
CCNL1	1.30966e-71	0.639259	0.557	0.372	1.79476e-67	1
DNAJB4	4.94089e-71	0.722297	0.457	0.259	6.771e-67	1
NFKBIA	5.55032e-68	0.545149	0.812	0.655	7.60616e-64	1
C1orf63	9.03086e-68	0.627763	0.441	0.259	1.23759e-63	1
SERTAD1	4.00977e-67	0.653398	0.418	0.228	5.49498e-63	1
BAG3	6.11277e-64	0.646588	0.429	0.24	8.37694e-60	1
H2AFZ	6.22308e-64	0.58734	0.559	0.394	8.52811e-60	1
CLK1	2.79121e-63	0.615562	0.337	0.173	3.82508e-59	1
HSPA8	1.88476e-62	0.448922	0.763	0.622	2.58288e-58	1
HSPB1	8.90408e-61	0.52517	0.836	0.721	1.22021e-56	1
UBC	1.8239e-60	0.343614	0.974	0.933	2.49947e-56	1
UBB	1.42748e-58	0.373655	0.922	0.858	1.95622e-54	1
MAFF	8.64987e-58	0.601605	0.352	0.182	1.18538e-53	1
CDKN1A	8.89265e-58	0.596546	0.382	0.206	1.21865e-53	1
MCL1	2.38212e-53	0.555675	0.381	0.234	3.26446e-49	1
CYR61	8.37904e-52	0.543413	0.67	0.502	1.14826e-47	1
ID3	1.78649e-50	0.438328	0.825	0.669	2.44821e-46	1
CRYAB	4.38888e-50	0.534277	0.781	0.725	6.01453e-46	1
EGR1	4.43661e-49	0.47602	0.559	0.403	6.07993e-45	1
NR4A1	9.16793e-49	0.535254	0.439	0.28	1.25637e-44	1
ATF3	5.88794e-48	0.582812	0.289	0.159	8.06883e-44	1
EIF5	1.08338e-45	0.417601	0.535	0.428	1.48467e-41	1
CEBPB	1.1984e-45	0.440126	0.59	0.459	1.64228e-41	1
HSPD1	1.22103e-43	0.485625	0.477	0.345	1.67329e-39	1
PCF11	5.04071e-43	0.477213	0.257	0.127	6.90779e-39	1
ARL6IP1	7.83137e-43	0.468603	0.437	0.297	1.07321e-38	1
CEBPD	1.23566e-42	0.367816	0.838	0.763	1.69335e-38	1
IER2	3.45998e-42	0.359252	0.807	0.663	4.74155e-38	1
GEM	1.89751e-41	0.574851	0.294	0.163	2.60034e-37	1
CSRNP1	1.33292e-39	0.483855	0.287	0.154	1.82663e-35	1
DUSP1	1.11942e-37	0.37915	0.857	0.783	1.53406e-33	1
MYC	2.19125e-37	0.446905	0.539	0.401	3.0029e-33	1
HERPUD1	2.17875e-36	0.37099	0.537	0.456	2.98575e-32	1
ZFAND2A	2.42721e-36	0.498532	0.274	0.15	3.32625e-32	1
WBP5	4.15607e-36	0.378208	0.61	0.557	5.69548e-32	1
BTG2	4.38456e-36	0.451715	0.391	0.283	6.00861e-32	1
CACYBP	6.91001e-36	0.402695	0.381	0.316	9.46948e-32	1
SAP18	4.30883e-35	0.295292	0.688	0.656	5.90482e-31	1
IRF1	5.73786e-35	0.471527	0.418	0.285	7.86317e-31	1
SOCS3	1.64841e-33	0.478063	0.392	0.256	2.25898e-29	1
SAT1	7.16358e-33	0.38706	0.618	0.511	9.81698e-29	1
WSB1	2.5148e-32	0.421692	0.339	0.244	3.44628e-28	1
CHMP1B	3.59115e-31	0.446291	0.343	0.237	4.92131e-27	1
OSER1	3.21501e-29	0.35803	0.271	0.197	4.40585e-25	1
CITED2	1.34952e-27	0.396313	0.4	0.319	1.84938e-23	1
ARID5B	2.35583e-27	0.390585	0.363	0.271	3.22843e-23	1
NXT1	7.51018e-27	0.35755	0.284	0.216	1.02919e-22	1
DNAJB6	1.10415e-26	0.311949	0.383	0.331	1.51313e-22	1
ADM	3.16892e-26	0.434251	0.332	0.214	4.34269e-22	1
EIF1B	6.72855e-26	0.329002	0.374	0.288	9.2208e-22	1
HSPE1	3.79522e-25	0.318239	0.546	0.49	5.20097e-21	1
TCP1	1.78527e-24	0.280801	0.347	0.31	2.44653e-20	1
CYCS	7.43073e-24	0.306149	0.287	0.222	1.01831e-19	1
MAP1LC3B	1.69056e-23	0.315849	0.342	0.283	2.31675e-19	1
CALM1	4.20599e-23	0.298597	0.456	0.384	5.76389e-19	1
PNRC1	1.14525e-22	0.29942	0.559	0.472	1.56946e-18	1
ID1	7.69867e-22	0.298589	0.682	0.557	1.05503e-17	1
HSPA5	8.40652e-22	0.3161	0.494	0.43	1.15203e-17	1
SFPQ	1.60738e-21	0.26279	0.31	0.25	2.20276e-17	1
RBM39	1.86761e-21	0.273248	0.469	0.392	2.55938e-17	1
MRPL18	2.26385e-21	0.276501	0.33	0.28	3.10237e-17	1
ZFAND5	4.18372e-21	0.262759	0.284	0.247	5.73337e-17	1
TUBB4B	1.78484e-20	0.346251	0.323	0.242	2.44594e-16	1
STMN1	3.0262e-20	0.361975	0.313	0.229	4.1471e-16	1
KLF2	1.17394e-19	0.330246	0.415	0.33	1.60877e-15	1
C16orf80	3.16483e-19	0.322365	0.27	0.214	4.33708e-15	1
TUBB2A	5.24254e-19	0.267355	0.376	0.32	7.18438e-15	1
TUBA1A	6.22853e-19	0.300579	0.602	0.551	8.53557e-15	1
STAT3	2.68038e-18	0.27205	0.273	0.227	3.6732e-14	1
MYADM	4.50399e-18	0.285881	0.251	0.183	6.17226e-14	1
ID2	8.35482e-15	0.272356	0.561	0.509	1.14494e-10	1
CFD	3.10843e-14	0.359312	0.318	0.217	4.25979e-10	1
G0S2	1.48659e-11	0.335151	0.251	0.199	2.03722e-07	1

## Sheet: Cluster2
gene	p_val	avg_logFC	pct.1	pct.2	p_val_adj	cluster
MT2A	5.16e-251	1.95098	0.945	0.6	7.07e-247	2
SOD2	1.26e-203	1.66737	0.933	0.419	1.73e-199	2
CCL2	3.74e-157	1.91206	0.834	0.276	5.13e-153	2
NNMT	1.69e-135	1.10014	0.949	0.607	2.32e-131	2
MT1M	1.41e-118	1.60853	0.723	0.241	1.93e-114	2
NFKBIA	1.99e-81	0.791939	0.947	0.691	2.72e-77	2
IER3	2.07e-80	1.11208	0.696	0.266	2.83e-76	2
MT1A	3.54e-79	1.25331	0.451	0.088	4.85e-75	2
CXCL1	1.28e-76	1.34754	0.376	0.052	1.76e-72	2
MT1E	4.01e-73	1.50861	0.653	0.336	5.5e-69	2
IRF1	1.09e-72	0.901739	0.74	0.294	1.5e-68	2
ICAM1	7.34e-71	1.00902	0.33	0.038	1.01e-66	2
CXCL2	2.57e-61	1.06945	0.458	0.11	3.52e-57	2
C11orf96	1.87e-57	1.11719	0.451	0.13	2.56e-53	2
IL32	2.6e-53	0.831944	0.643	0.281	3.56e-49	2
ZFP36	1.71e-52	0.711414	0.904	0.639	2.35e-48	2
MT1X	5.83e-45	0.85192	0.94	0.831	7.99e-41	2
NFKBIZ	4.5e-40	0.797824	0.407	0.132	6.16e-36	2
GADD45B	1.02e-38	0.55102	0.952	0.789	1.4e-34	2
CXCL3	6.43e-38	0.900518	0.265	0.054	8.82e-34	2
NAMPT	5.41e-32	0.682773	0.39	0.142	7.41e-28	2
SOCS3	1.01e-30	0.60432	0.569	0.281	1.38e-26	2
PPP1R15A	6.1e-29	0.496967	0.742	0.474	8.36e-25	2
CEBPD	5.8e-25	0.384939	0.92	0.778	7.95e-21	2
LDLR	1.54e-23	0.574012	0.292	0.103	2.11e-19	2
BCL3	2.51e-20	0.515025	0.296	0.113	3.44e-16	2
SAT1	2.82e-20	0.506692	0.725	0.534	3.86e-16	2
BAZ1A	4.08e-20	0.59889	0.299	0.12	5.59e-16	2
IFITM2	1.1e-19	0.39249	0.855	0.718	1.5e-15	2
PNRC1	2.06e-19	0.44022	0.682	0.487	2.83e-15	2
YBX3	3.46e-18	0.327961	0.793	0.591	4.74e-14	2
EIF4A1	6.43e-16	0.273601	0.935	0.822	8.82e-12	2
IFITM3	3.01e-15	0.31592	0.942	0.848	4.13e-11	2
MYC	9.7e-15	0.407922	0.631	0.435	1.33e-10	2
WTAP	2.27e-14	0.426638	0.342	0.175	3.11e-10	2
STX11	4.44e-14	0.447111	0.27	0.124	6.09e-10	2
CCNL1	4.76e-14	0.268099	0.624	0.424	6.52e-10	2
UGCG	7.45e-14	0.401452	0.28	0.128	1.02e-09	2
PIM3	1.77e-13	0.423864	0.263	0.117	2.43e-09	2
EIF5	2.38e-13	0.308566	0.646	0.451	3.26e-09	2
MIR22HG	3.39e-13	0.429909	0.294	0.144	4.65e-09	2
CSRNP1	1.05e-12	0.426076	0.352	0.19	1.44e-08	2
MAFF	2.62e-12	0.353892	0.4	0.231	3.59e-08	2
SERTAD1	9.81e-12	0.351723	0.458	0.284	1.34e-07	2
IER2	1.28e-11	0.351273	0.829	0.706	1.75e-07	2
DLK1	1.89e-11	0.318429	0.728	0.565	2.58e-07	2
S100A11	3.42e-11	0.322803	0.629	0.452	4.68e-07	2
VIMP	5.04e-11	0.357648	0.337	0.188	6.9e-07	2
KLF10	5.31e-11	0.376345	0.554	0.39	7.28e-07	2
NFE2L2	5.53e-11	0.318784	0.508	0.336	7.58e-07	2
XBP1	2.2e-10	0.390434	0.407	0.253	3.02e-06	2
BAG3	2.26e-10	0.274669	0.458	0.297	3.1e-06	2
CHRDL2	2.48e-10	0.295867	0.364	0.217	3.4e-06	2
DDX21	1.48e-09	0.258581	0.301	0.169	2.03e-05	2
GEM	9.2e-09	0.349821	0.335	0.2	0.000126089	2
MSC	1.27e-08	0.293596	0.306	0.177	0.000174353	2
CHD1	2.09e-08	0.279815	0.277	0.157	0.000287055	2
CDKN1A	5.7e-08	0.257994	0.395	0.26	0.000781602	2
BHLHE40	8.17e-08	0.302599	0.265	0.151	0.00111898	2
SFPQ	1.31e-07	0.330475	0.393	0.261	0.00179209	2
HES4	3.46e-07	0.308426	0.383	0.257	0.00474744	2
LDHA	4.19e-07	0.277899	0.598	0.478	0.00574528	2
HLA-E	4.47e-07	0.30641	0.46	0.346	0.00613174	2
CLIC4	5.39e-07	0.253749	0.301	0.186	0.00738473	2
FLOT1	1.33e-06	0.260295	0.253	0.149	0.0182314	2
ANGPTL4	3.25e-06	0.298727	0.383	0.265	0.044595	2
GADD45A	9.52e-06	0.272697	0.328	0.222	0.130457	2
NPPC	2.87e-05	0.372245	0.419	0.318	0.39322	2
NINJ1	5.96e-05	0.28612	0.277	0.187	0.816893	2

## Sheet: Cluster 3
gene	p_val	avg_logFC	pct.1	pct.2	p_val_adj	cluster
COL3A1	1.6004e-168	1.46984	0.689	0.081	2.19319e-164	3
COL1A2	6.09691e-137	1.3456	0.75	0.173	8.35521e-133	3
SPARC	6.57274e-125	1.16081	0.879	0.419	9.00728e-121	3
COL1A1	7.01563e-115	1.05976	0.419	0.027	9.61421e-111	3
SERPINF1	8.87763e-100	1.02394	0.879	0.384	1.21659e-95	3
CTHRC1	6.82061e-98	0.670592	0.336	0.021	9.34696e-94	3
THY1	1.42698e-94	0.906183	0.366	0.026	1.95553e-90	3
TNNT1	1.11161e-92	0.934093	0.288	0.01	1.52335e-88	3
PRSS23	6.2383e-92	0.760549	0.364	0.03	8.54897e-88	3
CLDN5	8.00235e-92	1.3905	0.563	0.115	1.09664e-87	3
CAV1	1.09684e-90	1.02112	0.874	0.417	1.50311e-86	3
MDK	4.2652e-88	1.06066	0.515	0.09	5.84503e-84	3
CFH	1.96608e-87	0.84873	0.659	0.18	2.69432e-83	3
COL6A1	4.41545e-82	0.695393	0.566	0.141	6.05093e-78	3
TMSB10	2.16235e-78	0.720581	0.987	0.813	2.96329e-74	3
CDH15	1.51031e-76	0.578001	0.528	0.149	2.06973e-72	3
GPC3	2.10104e-74	0.788241	0.293	0.021	2.87927e-70	3
COL6A2	1.23999e-71	0.831962	0.682	0.23	1.69928e-67	3
SERPINH1	4.27803e-71	0.508587	0.361	0.065	5.86262e-67	3
LRRC17	9.05748e-70	0.702867	0.311	0.032	1.24124e-65	3
GAPDH	4.69695e-68	0.535937	0.995	0.967	6.4367e-64	3
DYNLT1	1.87443e-67	0.322104	0.427	0.133	2.56872e-63	3
ARF5	1.23756e-66	0.348861	0.621	0.275	1.69595e-62	3
KLHL41	1.07149e-65	0.634942	0.631	0.219	1.46836e-61	3
BCKDK	1.19305e-65	0.374198	0.321	0.067	1.63495e-61	3
ARPC3	5.86748e-65	0.332457	0.664	0.301	8.04079e-61	3
RAB13	3.09913e-64	0.47611	0.485	0.154	4.24705e-60	3
TMEM70	1.67628e-63	0.381674	0.348	0.084	2.29717e-59	3
CD82	2.96932e-62	0.61485	0.737	0.313	4.06915e-58	3
MYL6B	1.68768e-61	0.810227	0.497	0.131	2.3128e-57	3
CD99	2.13941e-61	0.33068	0.477	0.185	2.93185e-57	3
TPPP3	1.64508e-60	0.912444	0.72	0.295	2.25442e-56	3
VKORC1	2.15265e-60	0.482563	0.593	0.233	2.94999e-56	3
TXNL1	4.53452e-60	0.256115	0.386	0.141	6.21411e-56	3
ISOC2	9.55169e-60	0.260949	0.313	0.086	1.30896e-55	3
PIGT	1.06747e-59	0.298	0.346	0.107	1.46286e-55	3
PGD	1.14052e-59	0.366188	0.303	0.068	1.56297e-55	3
PABPC4	3.98814e-59	0.271835	0.384	0.128	5.46534e-55	3
BSG	8.31526e-59	0.557458	0.609	0.228	1.13952e-54	3
MIR4435-1HG	2.58648e-58	0.462525	0.313	0.061	3.54451e-54	3
C9orf16	3.48298e-58	0.250341	0.48	0.21	4.77307e-54	3
CD151	8.34846e-58	0.334475	0.674	0.33	1.14407e-53	3
S100A16	2.30993e-57	0.847683	0.485	0.128	3.16553e-53	3
LINC00152	2.4895e-57	0.582522	0.399	0.099	3.41161e-53	3
EMC10	3.393e-57	0.252878	0.331	0.106	4.64977e-53	3
ITPA	3.97156e-57	0.312938	0.333	0.111	5.44262e-53	3
RCN1	4.00268e-57	0.29225	0.485	0.205	5.48527e-53	3
ARID5B	6.88762e-57	0.390774	0.621	0.276	9.43879e-53	3
MXRA8	3.09649e-56	0.457196	0.631	0.274	4.24343e-52	3
CASP4	4.19662e-56	0.319692	0.301	0.073	5.75105e-52	3
CLIC4	5.94546e-55	0.253842	0.434	0.174	8.14766e-51	3
TMEM98	6.43811e-55	0.286953	0.326	0.104	8.82279e-51	3
SUB1	7.49909e-55	0.262791	0.487	0.215	1.02768e-50	3
PLOD1	7.52299e-55	0.362699	0.376	0.117	1.03095e-50	3
MPG	1.00131e-54	0.295641	0.492	0.215	1.3722e-50	3
PHPT1	1.38161e-54	0.258521	0.581	0.285	1.89336e-50	3
YBEY	1.82425e-54	0.269903	0.321	0.101	2.49995e-50	3
SSR4	2.23415e-54	0.278473	0.677	0.361	3.06168e-50	3
RPL28	5.60652e-54	0.441254	0.995	0.948	7.68318e-50	3
TMEM123	6.51779e-54	0.474569	0.692	0.316	8.93198e-50	3
HSPG2	7.77488e-54	0.548772	0.301	0.052	1.06547e-49	3
GRN	8.77386e-54	0.385678	0.369	0.113	1.20237e-49	3
ANAPC11	9.26277e-54	0.303213	0.556	0.251	1.26937e-49	3
RTN2	1.23348e-53	0.302171	0.528	0.231	1.69036e-49	3
COL18A1	1.73786e-53	0.29816	0.535	0.241	2.38156e-49	3
GLRX3	1.83572e-53	0.307351	0.336	0.103	2.51566e-49	3
CDH13	2.10434e-53	0.283778	0.313	0.091	2.88379e-49	3
GPX1	2.45112e-53	0.31555	0.692	0.35	3.35901e-49	3
CD44	2.52247e-53	0.471171	0.525	0.197	3.4568e-49	3
HLA-A	5.09304e-53	0.605274	0.937	0.732	6.9795e-49	3
PLIN3	5.34438e-53	0.318619	0.394	0.142	7.32393e-49	3
OLFML2B	1.44586e-52	0.644565	0.619	0.242	1.98141e-48	3
PTGDS	2.21866e-52	0.419388	0.662	0.276	3.04046e-48	3
JSRP1	4.80795e-52	0.352244	0.634	0.32	6.58881e-48	3
PTRHD1	9.11908e-52	0.353342	0.313	0.084	1.24968e-47	3
TIMM13	1.00813e-51	0.397805	0.586	0.257	1.38154e-47	3
MMP2	3.26281e-51	0.430474	0.331	0.083	4.47136e-47	3
FKBP10	5.00277e-51	0.272444	0.306	0.098	6.8558e-47	3
CALD1	7.67813e-51	0.252517	0.457	0.207	1.05221e-46	3
HTRA1	2.42841e-50	0.572166	0.495	0.171	3.32789e-46	3
LY6E	2.71191e-50	0.306816	0.402	0.15	3.7164e-46	3
P4HB	3.14081e-50	0.388201	0.495	0.199	4.30417e-46	3
ERGIC3	3.7098e-50	0.256233	0.601	0.302	5.08391e-46	3
SIK1	4.48303e-50	0.351576	0.323	0.093	6.14354e-46	3
DAG1	8.7889e-50	0.402063	0.571	0.255	1.20443e-45	3
HMGN1	2.08661e-49	0.288519	0.591	0.285	2.85949e-45	3
TUBA1C	3.21829e-49	0.503415	0.316	0.07	4.41034e-45	3
POPDC3	4.00228e-49	0.434182	0.323	0.086	5.48473e-45	3
CCND3	5.67676e-49	0.347331	0.268	0.055	7.77943e-45	3
AP2S1	6.3049e-49	0.35518	0.389	0.135	8.64023e-45	3
B2M	3.78003e-48	0.487824	0.992	0.976	5.18016e-44	3
SGCA	4.60852e-48	0.293245	0.818	0.49	6.31552e-44	3
HLA-B	4.81317e-48	0.642847	0.851	0.514	6.59597e-44	3
IKBIP	1.51225e-47	0.390984	0.28	0.071	2.07239e-43	3
C1orf122	1.55144e-47	0.312113	0.318	0.099	2.1261e-43	3
CHRNA1	2.06555e-47	0.569691	0.871	0.52	2.83063e-43	3
PFN1	3.67617e-47	0.682239	0.912	0.691	5.03782e-43	3
THEMIS2	7.99861e-47	0.305131	0.321	0.102	1.09613e-42	3
ANXA6	1.19109e-46	0.252749	0.346	0.131	1.63227e-42	3
TMED9	1.25433e-46	0.335926	0.571	0.269	1.71893e-42	3
ARPC1B	2.01395e-46	0.289723	0.283	0.08	2.75992e-42	3
TOB1	2.33227e-46	0.28526	0.429	0.184	3.19614e-42	3
BAX	3.07319e-46	0.34824	0.338	0.11	4.2115e-42	3
HSP90B1	4.45597e-46	0.292962	0.525	0.253	6.10646e-42	3
CAV2	5.10198e-46	0.326369	0.283	0.078	6.99176e-42	3
MAP2K3	1.05869e-45	0.308091	0.27	0.075	1.45083e-41	3
C19orf48	1.20001e-45	0.250215	0.268	0.08	1.64449e-41	3
HEXA	1.43532e-45	0.293612	0.29	0.094	1.96697e-41	3
S100A13	1.6965e-45	0.439063	0.823	0.464	2.32488e-41	3
NOB1	2.24167e-45	0.259991	0.399	0.182	3.07198e-41	3
HLA-E	3.17185e-45	0.266308	0.616	0.332	4.3467e-41	3
RRAD	3.46819e-45	0.838941	0.333	0.07	4.7528e-41	3
ANKRD10	7.6832e-45	0.502466	0.73	0.37	1.05291e-40	3
C19orf10	2.77391e-44	0.310736	0.598	0.297	3.80136e-40	3
PSMB5	9.23675e-44	0.291885	0.495	0.246	1.2658e-39	3
GPM6B	1.63738e-43	0.556503	0.801	0.442	2.24387e-39	3
FKBP1A	1.90571e-43	0.335163	0.644	0.335	2.61158e-39	3
SH3BGRL3	2.57816e-43	0.717833	0.508	0.182	3.53312e-39	3
TYMP	5.65945e-43	0.256391	0.371	0.153	7.75571e-39	3
CALU	1.41152e-42	0.339644	0.285	0.082	1.93434e-38	3
HSPB2	1.77768e-42	0.478772	0.404	0.135	2.43614e-38	3
SNHG7	2.73523e-42	0.299524	0.679	0.379	3.74836e-38	3
PTMS	5.39819e-42	0.267552	0.684	0.385	7.39767e-38	3
SPATS2L	6.86853e-42	0.528418	0.859	0.53	9.41263e-38	3
ANXA11	9.66264e-42	0.276779	0.273	0.09	1.32417e-37	3
TPR	1.06074e-41	0.368414	0.369	0.179	1.45364e-37	3
EIF5A	2.04954e-41	0.300045	0.354	0.142	2.80869e-37	3
SNAI2	2.44819e-41	0.333065	0.338	0.115	3.355e-37	3
STAC3	4.84538e-41	0.369876	0.601	0.295	6.64011e-37	3
VAMP5	6.74084e-41	0.256804	0.672	0.376	9.23765e-37	3
PPP1CA	8.01547e-41	0.285778	0.437	0.199	1.09844e-36	3
TXN	2.84933e-40	0.281669	0.568	0.297	3.90473e-36	3
EMP3	3.16151e-40	0.465043	0.659	0.332	4.33254e-36	3
CALR	1.32662e-39	0.259083	0.457	0.227	1.818e-35	3
FABP5	2.75254e-39	0.554311	0.384	0.123	3.77208e-35	3
PSMB9	9.2719e-39	0.252332	0.255	0.084	1.27062e-34	3
S100A10	1.15196e-38	0.69377	0.891	0.619	1.57865e-34	3
PSME2	1.80137e-38	0.370614	0.432	0.179	2.46859e-34	3
VWA1	4.45244e-38	0.32984	0.343	0.132	6.10163e-34	3
NEAT1	6.09342e-38	0.644542	0.798	0.504	8.35042e-34	3
CTSF	1.27127e-37	0.254778	0.351	0.152	1.74215e-33	3
ARPC2	3.19722e-37	0.253855	0.545	0.294	4.38146e-33	3
ITGB1	3.68199e-37	0.250775	0.293	0.125	5.0458e-33	3
CCDC90B	4.4761e-37	0.338584	0.298	0.101	6.13405e-33	3
C9orf89	4.69905e-37	0.377218	0.323	0.127	6.43957e-33	3
TPM2	5.78117e-37	0.598768	0.571	0.256	7.92252e-33	3
PPDPF	1.04525e-36	0.389661	0.745	0.425	1.43241e-32	3
ANK1	1.50688e-36	0.334617	0.26	0.073	2.06503e-32	3
DES	1.77816e-36	0.523232	0.677	0.347	2.4368e-32	3
CCNG2	7.21593e-36	0.263111	0.265	0.084	9.88871e-32	3
PRELID1	3.46821e-35	0.343545	0.581	0.304	4.75283e-31	3
MEST	1.13266e-34	0.443945	0.818	0.505	1.5522e-30	3
TPM4	5.47562e-34	0.323302	0.442	0.209	7.50379e-30	3
IL32	6.93472e-34	0.428021	0.583	0.288	9.50334e-30	3
GUK1	3.89887e-33	0.342341	0.699	0.412	5.34301e-29	3
RGS2	1.11935e-32	0.26811	0.52	0.28	1.53396e-28	3
SIRT2	1.31479e-32	0.434416	0.631	0.341	1.80179e-28	3
METTL7B	6.68456e-32	0.315943	0.26	0.084	9.16052e-28	3
ENO1	1.02686e-31	0.60345	0.682	0.371	1.40721e-27	3
HLA-C	2.96174e-31	0.518568	0.866	0.628	4.05877e-27	3
STMN1	3.80731e-29	0.385674	0.487	0.239	5.21754e-25	3
PDLIM3	4.83317e-29	0.300481	0.604	0.345	6.62338e-25	3
ZFAND2A	2.03264e-26	0.289412	0.374	0.18	2.78553e-22	3
GADD45G	6.40942e-26	0.298943	0.255	0.093	8.78347e-22	3
HSPB1	1.70036e-25	0.399726	0.934	0.748	2.33017e-21	3
LMNA	1.96524e-25	0.268067	0.816	0.564	2.69316e-21	3
RASSF4	6.28534e-25	0.322062	0.422	0.217	8.61342e-21	3
TIMP1	9.86381e-25	0.763819	0.775	0.528	1.35174e-20	3
MIF	4.71109e-23	0.399673	0.904	0.698	6.45608e-19	3
CHMP1B	1.00214e-22	0.30262	0.465	0.26	1.37334e-18	3
GPX4	2.41102e-22	0.295333	0.866	0.634	3.30406e-18	3
VIM	9.95009e-22	0.327685	0.995	0.979	1.36356e-17	3
NPTX2	1.04599e-21	0.358219	0.27	0.108	1.43343e-17	3
TMSB4X	1.13785e-21	0.56604	0.864	0.669	1.5593e-17	3
HSPH1	1.55583e-21	0.252173	0.399	0.218	2.13211e-17	3
SERF2	1.30169e-20	0.250045	0.899	0.69	1.78383e-16	3
C1QTNF3	2.15806e-20	0.365507	0.361	0.181	2.9574e-16	3
ANXA2	5.29876e-20	0.419245	0.907	0.708	7.26142e-16	3
TPI1	1.10598e-19	0.270437	0.745	0.521	1.51564e-15	3
LDHA	2.68939e-19	0.406249	0.694	0.469	3.68554e-15	3
PKM	4.62816e-19	0.414863	0.694	0.458	6.34242e-15	3
EEF2	4.33828e-17	0.252129	0.949	0.835	5.94518e-13	3
ID1	1.38206e-14	0.399667	0.778	0.587	1.89397e-10	3
LGALS1	4.17271e-14	0.317943	0.987	0.928	5.71828e-10	3
HSPA6	1.97519e-09	0.581482	0.313	0.176	2.7068e-05	3
APOC1	2.36576e-06	0.272767	0.955	0.898	0.0324203	3
APOE	4.07038e-05	0.358641	0.967	0.952	0.557805	3

## Sheet: Cluster 4
gene	p_val	avg_logFC	pct.1	pct.2	p_val_adj	cluster
IGFBP6	2.20302e-303	4.66679	1	0.143	3.01902e-299	4
IGFBP7	1.07629e-241	3.33292	0.973	0.212	1.47495e-237	4
DCN	2.26215e-188	4.55688	1	0.012	3.10005e-184	4
TMSB4X	6.65362e-145	2.21296	1	0.681	9.11811e-141	4
MFAP5	1.37213e-118	2.69098	0.797	0.001	1.88036e-114	4
APOD	1.47371e-108	5.2111	0.824	0.017	2.01957e-104	4
TM4SF1	7.93705e-103	2.46568	0.838	0.017	1.08769e-98	4
GSN	1.02054e-95	1.83416	0.973	0.467	1.39855e-91	4
PTGDS	1.25077e-92	3.06806	0.878	0.3	1.71406e-88	4
TAGLN	1.97506e-92	2.32552	0.959	0.383	2.70662e-88	4
LUM	3.50296e-85	2.46239	0.622	0.002	4.80046e-81	4
SOD3	1.05218e-84	2.41624	0.757	0.021	1.4419e-80	4
PLAC9	2.0447e-78	2.30768	0.703	0.017	2.80206e-74	4
SLC2A1	3.72036e-76	2.07033	0.703	0.024	5.09838e-72	4
ANGPTL7	6.02316e-74	1.89815	0.527	0	8.25414e-70	4
ADH1B	1.72744e-73	2.06942	0.541	0.001	2.36729e-69	4
PDGFRL	7.75073e-69	1.87816	0.581	0.005	1.06216e-64	4
SBSPON	1.14828e-67	1.64415	0.514	0.001	1.5736e-63	4
ITM2B	1.57182e-66	1.26215	0.973	0.737	2.15403e-62	4
IFI27	3.08653e-66	1.83185	0.595	0.01	4.22978e-62	4
PRELP	5.08923e-66	1.90176	0.662	0.014	6.97428e-62	4
C2orf40	3.71262e-64	2.01429	0.554	0.007	5.08777e-60	4
A4GALT	8.38453e-64	1.81038	0.595	0.014	1.14902e-59	4
RP11-398J10.2	2.74455e-62	1.69972	0.432	0	3.76114e-58	4
KLF5	4.30913e-59	1.94697	0.743	0.077	5.90523e-55	4
ADIRF	3.19969e-58	1.28309	0.973	0.833	4.38486e-54	4
SLC22A3	2.11438e-57	1.46445	0.446	0.001	2.89755e-53	4
CYP4B1	1.73717e-53	1.3678	0.392	0	2.38062e-49	4
TCEB2	9.00128e-53	1.34342	0.932	0.457	1.23354e-48	4
MEOX2	2.27158e-50	1.39575	0.405	0.002	3.11298e-46	4
CSRP1	4.77061e-50	1.81066	0.622	0.097	6.53765e-46	4
GSTM5	1.20688e-46	1.25644	0.351	0	1.65391e-42	4
NDUFA4L2	6.48721e-46	1.71066	0.432	0.005	8.89007e-42	4
SDCBP	1.43641e-45	1.55957	0.73	0.24	1.96845e-41	4
SFRP5	2.9327e-45	1.10676	0.338	0	4.01897e-41	4
FIBIN	9.45815e-45	1.54232	0.541	0.021	1.29614e-40	4
INHBA	1.17444e-41	1.08544	0.311	0	1.60945e-37	4
NR2F2	1.53124e-41	1.54338	0.635	0.062	2.09842e-37	4
KRT19	2.91316e-41	1.69548	0.311	0	3.99219e-37	4
CRIP1	3.93707e-41	1.40231	0.514	0.022	5.39536e-37	4
CYB5A	1.09994e-40	1.60889	0.73	0.164	1.50736e-36	4
CLTB	3.31839e-40	1.50446	0.716	0.156	4.54752e-36	4
LMO7	1.3364e-39	1.44296	0.473	0.028	1.8314e-35	4
LAMA4	1.72202e-38	0.991474	0.27	0	2.35986e-34	4
C19orf33	1.72202e-38	1.2191	0.27	0	2.35986e-34	4
CYP1B1	6.23594e-37	1.08257	0.284	0	8.54573e-33	4
CAV1	1.28856e-36	1.30475	0.919	0.449	1.76584e-32	4
TNNC1	3.72228e-35	1.46371	0.405	0.011	5.10102e-31	4
PERP	5.90403e-35	1.39234	0.554	0.047	8.09088e-31	4
GLUL	1.17322e-34	1.28821	0.824	0.429	1.60777e-30	4
LTBP4	1.8339e-33	1.38433	0.784	0.236	2.51318e-29	4
PTN	2.55254e-33	1.05982	0.284	0.003	3.498e-29	4
EBF2	3.67052e-33	0.932692	0.257	0	5.03008e-29	4
SFRP4	4.45073e-33	1.65489	0.554	0.062	6.09928e-29	4
C1S	7.63714e-32	1.32763	0.622	0.084	1.04659e-27	4
AKAP12	9.03013e-32	1.45458	0.568	0.081	1.23749e-27	4
CDO1	2.53e-31	1.23173	0.446	0.023	3.46712e-27	4
MALAT1	3.42979e-31	0.556348	1	1	4.70018e-27	4
AES	3.80906e-30	1.37725	0.514	0.07	5.21994e-26	4
PRKCDBP	1.40755e-29	1.33063	0.689	0.168	1.92891e-25	4
S100A6	4.31089e-28	0.75163	1	0.979	5.90765e-24	4
FLRT2	8.78019e-28	1.15877	0.27	0.004	1.20324e-23	4
DKK3	1.05543e-27	1.27104	0.459	0.05	1.44636e-23	4
NGFR	1.13523e-27	1.17408	0.297	0.006	1.55571e-23	4
ITGA6	5.23123e-27	1.26853	0.297	0.009	7.16888e-23	4
LGALS1	1.20058e-26	0.769382	0.986	0.932	1.64527e-22	4
MYL12A	2.30391e-26	0.89533	0.892	0.574	3.15728e-22	4
TJP1	8.08331e-26	1.21414	0.459	0.046	1.10774e-21	4
LINC01088	1.14653e-25	1.04482	0.284	0.006	1.5712e-21	4
BNC2	1.21048e-25	1.08841	0.311	0.012	1.65884e-21	4
GSTM3	6.78761e-25	1.24688	0.554	0.097	9.30174e-21	4
CAV2	1.8425e-24	1.21664	0.527	0.089	2.52497e-20	4
DDIT4	2.09319e-24	1.19872	0.77	0.393	2.86851e-20	4
TXN	1.51411e-23	1.10593	0.797	0.312	2.07493e-19	4
MYL12B	2.79527e-23	0.856507	0.865	0.576	3.83063e-19	4
CST3	8.079e-23	0.761111	0.986	0.87	1.10715e-18	4
IFITM1	1.33329e-21	1.18284	0.568	0.118	1.82714e-17	4
PDLIM1	1.17398e-20	1.13123	0.365	0.036	1.60883e-16	4
PLEKHA4	5.80005e-20	1.16633	0.419	0.081	7.94839e-16	4
NBL1	1.38906e-19	0.918365	0.324	0.024	1.90357e-15	4
PHLDA3	4.20128e-19	1.13863	0.473	0.136	5.75743e-15	4
CALD1	5.24179e-19	1.04305	0.581	0.223	7.18335e-15	4
ITM2A	5.29888e-19	1.11554	0.311	0.021	7.26159e-15	4
RARRES2	1.98756e-18	0.878532	0.838	0.417	2.72376e-14	4
AKR1C2	2.12296e-18	0.913773	0.284	0.018	2.9093e-14	4
FGL2	2.69891e-18	1.05714	0.595	0.177	3.69858e-14	4
USP53	4.64622e-17	1.1991	0.419	0.092	6.36718e-13	4
LAPTM4A	1.43943e-16	0.665938	0.973	0.811	1.9726e-12	4
PROS1	1.75262e-16	0.993368	0.311	0.042	2.40179e-12	4
ACTB	3.80911e-16	0.617567	1	0.928	5.22e-12	4
MYL9	4.26648e-16	1.02566	0.541	0.18	5.84679e-12	4
ANXA2	7.80638e-16	0.676817	0.878	0.723	1.06979e-11	4
STXBP6	1.32446e-15	0.872076	0.284	0.026	1.81505e-11	4
EFNB1	1.34712e-15	0.885621	0.257	0.02	1.84609e-11	4
GSTP1	2.17245e-15	0.611554	0.932	0.71	2.97712e-11	4
MGP	3.10977e-15	0.937998	0.824	0.402	4.26163e-11	4
SERPING1	6.42571e-14	0.85402	0.716	0.346	8.80579e-10	4
CSTB	7.26203e-14	0.934948	0.568	0.213	9.95188e-10	4
MATN2	4.73825e-13	0.988075	0.419	0.125	6.4933e-09	4
S100A10	5.43025e-13	0.590403	0.946	0.637	7.44161e-09	4
PTRF	7.94666e-13	0.802099	0.662	0.28	1.08901e-08	4
PLSCR4	1.08677e-12	0.803759	0.297	0.039	1.48931e-08	4
NPDC1	1.75676e-12	0.883309	0.311	0.053	2.40746e-08	4
PHGDH	3.42304e-12	0.883103	0.297	0.047	4.69093e-08	4
CCDC3	3.8091e-12	0.969517	0.311	0.05	5.22e-08	4
GAS6	5.88587e-12	1.03804	0.378	0.105	8.066e-08	4
CTGF	3.70374e-11	1.11595	0.392	0.093	5.0756e-07	4
SDPR	1.84131e-10	0.859131	0.446	0.219	2.52333e-06	4
PDLIM2	2.16381e-10	0.853152	0.324	0.08	2.96528e-06	4
CD9	2.86114e-10	0.560445	0.919	0.735	3.92091e-06	4
UBE2E2	4.03598e-10	0.766543	0.324	0.07	5.53091e-06	4
LY6E	4.28846e-10	0.779766	0.473	0.166	5.8769e-06	4
CARHSP1	4.9192e-10	0.796673	0.392	0.116	6.74128e-06	4
FTL	4.95153e-10	0.41725	1	0.981	6.78557e-06	4
CALM2	1.21114e-09	0.558408	0.959	0.817	1.65974e-05	4
NR4A1	3.21879e-09	0.825414	0.514	0.337	4.41103e-05	4
TMSB10	3.77876e-09	0.544935	0.946	0.826	5.17842e-05	4
ARL4D	9.69309e-09	0.763396	0.324	0.085	0.000132834	4
HCFC1R1	1.06148e-08	0.703024	0.392	0.125	0.000145465	4
PALMD	1.16982e-08	0.792083	0.284	0.07	0.000160312	4
DAAM1	1.78739e-08	0.779865	0.338	0.1	0.000244944	4
CFD	1.98258e-08	0.459826	0.568	0.25	0.000271693	4
TPM4	4.47593e-08	0.700003	0.5	0.225	0.000613382	4
TECR	7.35237e-08	0.717786	0.514	0.238	0.00100757	4
ARPC5	9.63836e-08	0.679753	0.446	0.25	0.00132084	4
ARPC2	1.0109e-07	0.621913	0.595	0.311	0.00138533	4
ADI1	1.39955e-07	0.633145	0.392	0.132	0.00191795	4
SCP2	1.48008e-07	0.665301	0.473	0.198	0.0020283	4
UGP2	1.73085e-07	0.709575	0.378	0.124	0.00237196	4
FHL1	1.74792e-07	0.747375	0.432	0.167	0.00239535	4
SYNGR2	2.49768e-07	0.639266	0.27	0.065	0.00342282	4
AHNAK	2.73417e-07	0.668098	0.486	0.253	0.00374691	4
H3F3B	2.75686e-07	0.349457	1	0.984	0.003778	4
C10orf54	2.87546e-07	0.72269	0.419	0.169	0.00394053	4
SEPP1	3.05417e-07	0.430363	0.878	0.657	0.00418543	4
ACTN4	3.24069e-07	0.6525	0.365	0.123	0.00444104	4
FTH1	4.76156e-07	0.295811	1	0.993	0.00652524	4
SRI	4.92016e-07	0.659831	0.595	0.327	0.00674259	4
TIMP1	4.98073e-07	0.547281	0.743	0.547	0.00682559	4
SEPW1	5.65751e-07	0.67137	0.541	0.255	0.00775305	4
AP3S1	6.08921e-07	0.654273	0.365	0.145	0.00834465	4
COX6C	8.21062e-07	0.50621	0.743	0.466	0.0112518	4
TSPAN4	1.24471e-06	0.706355	0.284	0.087	0.0170575	4
VIT	1.4649e-06	0.641832	0.257	0.07	0.020075	4
CCDC23	1.46568e-06	0.5971	0.324	0.102	0.0200857	4
PHPT1	1.76668e-06	0.647147	0.554	0.306	0.0242106	4
TMBIM6	1.81999e-06	0.525544	0.608	0.417	0.0249411	4
PTMS	2.4363e-06	0.526536	0.635	0.407	0.033387	4
EPB41L2	2.86551e-06	0.552761	0.257	0.067	0.039269	4
DSTN	3.06435e-06	0.475484	0.73	0.537	0.0419939	4
EPHX1	3.27186e-06	0.741786	0.324	0.154	0.0448376	4
CFH	6.26155e-06	0.576008	0.459	0.218	0.0858082	4
TIMP2	6.67419e-06	0.665637	0.297	0.108	0.0914631	4
POLR2L	6.89394e-06	0.515899	0.568	0.299	0.0944746	4
ARPC1B	9.12168e-06	0.568025	0.284	0.094	0.125004	4
SERF2	9.47936e-06	0.402224	0.851	0.706	0.129905	4
ALDH2	1.04297e-05	0.55829	0.324	0.114	0.142928	4
FKBP5	1.08728e-05	0.649181	0.284	0.098	0.149001	4
SEC62	1.23714e-05	0.51995	0.716	0.521	0.169538	4
PIK3R1	1.50226e-05	0.610709	0.365	0.148	0.20587	4
THBS4	1.55754e-05	0.622751	0.351	0.137	0.213446	4
CD151	2.55194e-05	0.518835	0.595	0.356	0.349718	4
EID1	3.02897e-05	0.326371	0.892	0.717	0.41509	4
TPM1	3.73928e-05	0.448942	0.514	0.266	0.512432	4
CYTH2	3.91025e-05	0.545785	0.27	0.095	0.535861	4
PLP2	4.30843e-05	0.50945	0.473	0.327	0.590427	4
SERINC1	5.04946e-05	0.556958	0.338	0.163	0.691977	4
RNH1	5.57188e-05	0.52844	0.473	0.277	0.76357	4
PEBP1	6.29891e-05	0.345231	0.865	0.688	0.863202	4
HINT1	7.51208e-05	0.441206	0.676	0.467	1	4
SPTBN1	8.11409e-05	0.54956	0.392	0.218	1	4
CYB5R3	9.5851e-05	0.543848	0.378	0.177	1	4
ARL2	9.63263e-05	0.503628	0.514	0.291	1	4
EBPL	0.000103404	0.559718	0.419	0.214	1	4
ADH5	0.000117793	0.486538	0.432	0.226	1	4
YBX1	0.00012116	0.324593	0.851	0.79	1	4
MYL6	0.000157054	0.339144	0.905	0.765	1	4
TACC1	0.000201169	0.528847	0.284	0.149	1	4
BST2	0.000209779	0.487612	0.378	0.175	1	4
ACTG1	0.000229745	0.270141	0.959	0.857	1	4
NGFRAP1	0.000342116	0.469968	0.459	0.336	1	4
ARGLU1	0.000475595	0.498749	0.338	0.163	1	4
RAP1B	0.000493183	0.470057	0.297	0.13	1	4
ARPC1A	0.000553719	0.457276	0.324	0.144	1	4
SSR3	0.000576527	0.422114	0.338	0.156	1	4
DCXR	0.000598554	0.534038	0.311	0.154	1	4
TUBB	0.000641701	0.404651	0.662	0.493	1	4
C6orf48	0.000719811	0.396014	0.568	0.357	1	4
PPDPF	0.000722351	0.398086	0.649	0.45	1	4
ALDH9A1	0.000749049	0.423385	0.27	0.11	1	4
IFITM3	0.000883271	0.275265	0.946	0.855	1	4
KRTCAP2	0.000945061	0.462499	0.473	0.3	1	4
TSR2	0.00117986	0.443654	0.284	0.126	1	4
SERP1	0.00138682	0.425299	0.405	0.237	1	4
GNB2	0.00141507	0.415451	0.405	0.224	1	4
ETFB	0.00169356	0.418302	0.419	0.236	1	4
CBR1	0.00185315	0.599009	0.459	0.286	1	4
TXNIP	0.00194354	0.32747	0.784	0.595	1	4
RBMS1	0.00225692	0.472382	0.284	0.137	1	4
TMEM47	0.00234697	0.399986	0.257	0.113	1	4
FXYD1	0.00250393	0.402381	0.432	0.254	1	4
PNKD	0.00261514	0.434429	0.351	0.202	1	4
DYNLRB1	0.00276623	0.386114	0.446	0.27	1	4
DDAH2	0.0029052	0.3217	0.554	0.357	1	4
MMP24-AS1	0.00293739	0.693045	0.257	0.134	1	4
TCEAL4	0.00310846	0.459685	0.432	0.284	1	4
TPM3	0.00321638	0.421849	0.311	0.16	1	4
TCF4	0.00324186	0.424031	0.419	0.251	1	4
NUDC	0.0033723	0.366882	0.5	0.322	1	4
TRAM1	0.00346235	0.409115	0.351	0.21	1	4
PQLC3	0.00364865	0.417442	0.257	0.12	1	4
RBX1	0.00386968	0.401854	0.405	0.28	1	4
ABCA8	0.00387181	0.433283	0.324	0.165	1	4
SLC29A1	0.004018	0.461929	0.257	0.128	1	4
TUBA1B	0.00524093	0.33092	0.77	0.608	1	4
IER3IP1.1	0.00526251	0.424825	0.297	0.168	1	4
RNASET2	0.00530116	0.43104	0.257	0.16	1	4
PRDX5	0.00592301	0.364625	0.608	0.455	1	4
AKAP13	0.00638557	0.414932	0.257	0.134	1	4
MXRA8	0.00667264	0.392256	0.432	0.303	1	4
SELM	0.00667528	0.361055	0.662	0.548	1	4
BCAP31	0.00734748	0.374809	0.324	0.184	1	4
VIMP	0.00778633	0.442766	0.324	0.199	1	4
NUCKS1	0.00872456	0.286489	0.649	0.507	1	4
TMEM66	0.00874746	0.333183	0.676	0.524	1	4
ENSA	0.00912834	0.351762	0.351	0.2	1	4
CRTAP	0.00940176	0.354768	0.338	0.191	1	4
ISCU	0.0095099	0.370887	0.473	0.321	1	4
FCGRT	0.00953137	0.306471	0.554	0.432	1	4
FKBP8	0.00988167	0.494258	0.405	0.313	1	4

## Sheet: Cluster 5
gene	p_val	avg_logFC	pct.1	pct.2	p_val_adj	cluster
DES	3.68404e-97	2.61327	1	0.371	5.0486e-93	5
NEB	3.32915e-95	3.00189	1	0.237	4.56227e-91	5
TNNT3	1.30484e-91	4.56431	1	0.009	1.78816e-87	5
MYL1	1.83161e-85	4.46204	1	0.019	2.51004e-81	5
TNNI2	7.04258e-83	4.28088	1	0.002	9.65115e-79	5
TNNC2	7.39856e-77	4.89258	0.968	0.012	1.0139e-72	5
MYLPF	1.94034e-74	4.11764	0.935	0.011	2.65904e-70	5
CKM	2.57127e-74	3.83708	0.968	0.011	3.52367e-70	5
TTN	1.50033e-72	3.33509	1	0.007	2.05605e-68	5
MYOZ1	2.68819e-72	3.33254	0.968	0.002	3.6839e-68	5
COX6A2	4.29142e-72	3.26552	0.968	0.043	5.88096e-68	5
GAMT	7.13817e-69	2.59699	1	0.071	9.78215e-65	5
TPM2	3.33239e-61	2.33447	0.935	0.279	4.56671e-57	5
YBX3	8.14868e-56	1.92404	1	0.607	1.11669e-51	5
MB	1.04924e-55	3.18091	0.806	0.005	1.43787e-51	5
RAMP1	1.75279e-55	2.3711	0.839	0.003	2.40202e-51	5
MYBPC1	9.10394e-52	2.57793	0.806	0.005	1.2476e-47	5
CA3	1.56433e-51	2.47596	0.968	0.428	2.14375e-47	5
CASQ2	2.38609e-49	1.87056	0.71	0.001	3.2699e-45	5
ENO3	4.10223e-48	2.67876	0.806	0.014	5.62169e-44	5
TNNC1	7.58513e-48	3.44688	0.806	0.012	1.03947e-43	5
TNNI1	1.72031e-47	3.23601	0.742	0.006	2.35751e-43	5
MAP3K7CL	1.62988e-45	2.4596	0.742	0.022	2.23358e-41	5
IL32	1.18184e-43	2.23657	0.968	0.309	1.6196e-39	5
TPM1	1.38806e-43	2.15923	0.903	0.266	1.90219e-39	5
CSRP3	8.36887e-43	2.66082	0.645	0.001	1.14687e-38	5
PEBP4	5.98736e-42	1.96422	0.677	0.003	8.20508e-38	5
HSPB3	1.17302e-41	1.76777	0.645	0.002	1.60751e-37	5
FHL1	1.30073e-41	2.13771	0.839	0.167	1.78253e-37	5
ACTA1	4.2942e-41	2.73262	0.774	0.018	5.88477e-37	5
TMEM52	9.6089e-40	1.90422	0.645	0.002	1.3168e-35	5
ART3	8.12493e-39	1.52833	0.548	0	1.11344e-34	5
ATPIF1	3.21264e-37	1.87726	0.903	0.282	4.4026e-33	5
TRIM63	5.79818e-37	1.87933	0.548	0.001	7.94583e-33	5
LMOD2	2.26603e-36	1.37361	0.548	0.001	3.10536e-32	5
CPE	2.5876e-36	2.40705	0.806	0.038	3.54604e-32	5
APOBEC2	1.08173e-35	1.56298	0.645	0.005	1.4824e-31	5
MYOG	8.5198e-35	2.20583	0.677	0.007	1.16755e-30	5
BIN1	1.59117e-34	2.13958	0.806	0.07	2.18054e-30	5
ACTN2	5.17479e-33	1.80439	0.645	0.011	7.09153e-29	5
SMPX	8.17542e-33	1.31214	0.516	0.001	1.12036e-28	5
PGAM2	8.76946e-33	1.97834	0.613	0.006	1.20177e-28	5
SLN	1.4087e-32	2.20028	0.871	0.045	1.93048e-28	5
LDB3	5.74422e-31	1.3447	0.516	0.002	7.87188e-27	5
RPL3L	6.55748e-31	1.45299	0.516	0.002	8.98637e-27	5
CALML6	1.30665e-29	1.89645	0.452	0.001	1.79064e-25	5
PDE4DIP	1.05321e-28	1.76882	0.806	0.054	1.44333e-24	5
EEF1A2	1.14663e-28	1.26245	0.419	0	1.57135e-24	5
MYBPC2	1.50235e-28	1.67457	0.419	0	2.05882e-24	5
RBM24	1.60489e-28	1.379	0.613	0.013	2.19934e-24	5
FAM134B	1.00073e-27	1.70413	0.613	0.011	1.3714e-23	5
MURC	5.75382e-27	1.42025	0.419	0.001	7.88504e-23	5
MALAT1	2.26118e-26	0.760412	1	1	3.09872e-22	5
KLHL41	4.37545e-26	1.6713	0.935	0.25	5.99612e-22	5
PPP1R3A	4.4169e-26	1.06451	0.355	0	6.05291e-22	5
KLHL40	1.443e-25	1.33363	0.484	0.004	1.97749e-21	5
XIRP2	2.70588e-25	1.22184	0.387	0	3.70814e-21	5
CKB	4.23608e-25	1.57874	0.613	0.018	5.80512e-21	5
COX7A1	4.52101e-25	1.59725	0.839	0.33	6.19559e-21	5
AK1	5.9714e-25	1.71309	0.806	0.2	8.1832e-21	5
MYH8	5.20557e-24	1.64596	0.387	0.001	7.13372e-20	5
ACTC1	5.90258e-24	2.2967	0.613	0.029	8.0889e-20	5
HRC	6.4179e-24	0.909009	0.355	0	8.79509e-20	5
NRAP	7.5834e-24	0.923465	0.355	0	1.03923e-19	5
CACNG1	1.01415e-23	1.08989	0.323	0	1.3898e-19	5
MYOT	1.55555e-23	1.40647	0.484	0.006	2.13173e-19	5
AMPD1	4.33156e-23	0.834606	0.355	0	5.93596e-19	5
ARPP21	6.70373e-23	1.35676	0.484	0.007	9.18679e-19	5
CTD-2545M3.8	2.14295e-22	1.10288	0.419	0.003	2.9367e-18	5
RP11-166O4.5	6.25555e-21	0.996298	0.323	0	8.5726e-17	5
FXYD1	1.19283e-20	1.41327	0.871	0.252	1.63466e-16	5
UNC45B	1.82676e-20	0.908195	0.323	0.001	2.50339e-16	5
S100A1	5.05089e-20	2.08675	0.452	0.023	6.92174e-16	5
MEF2C	6.05215e-20	1.49341	0.613	0.036	8.29386e-16	5
BTNL8	9.18079e-20	1.11008	0.323	0.001	1.25814e-15	5
CMYA5	1.16501e-19	1.27696	0.484	0.012	1.59653e-15	5
CAP2	1.28102e-19	1.33374	0.516	0.019	1.75551e-15	5
FGGY	1.73139e-19	1.63754	0.581	0.048	2.3727e-15	5
ADSSL1	2.42139e-19	1.28845	0.484	0.012	3.31828e-15	5
GPD1	2.62765e-19	0.763325	0.29	0	3.60094e-15	5
TCAP	4.45372e-19	1.98628	0.71	0.065	6.10337e-15	5
CAMK2B	5.01758e-19	0.911134	0.323	0.001	6.87609e-15	5
TMEM38A	1.1455e-18	1.54161	0.548	0.029	1.56979e-14	5
NEXN	7.1859e-18	1.26672	0.516	0.022	9.84755e-14	5
HSPB1	2.92997e-17	1.17057	1	0.763	4.01523e-13	5
DLEU2L	1.49647e-16	0.81557	0.29	0.001	2.05076e-12	5
MYH2	2.53933e-16	1.17711	0.258	0	3.4799e-12	5
SLC25A4	1.14304e-15	1.32662	0.71	0.102	1.56642e-11	5
ETS2	1.26142e-15	1.46512	0.677	0.105	1.72865e-11	5
ELAVL2	1.95077e-15	0.828641	0.29	0.002	2.67334e-11	5
HSPB8	2.67439e-15	1.41569	0.516	0.039	3.66499e-11	5
MYOZ2	2.80624e-15	1.15476	0.29	0.003	3.84567e-11	5
FILIP1	3.85998e-15	1.01	0.452	0.02	5.28972e-11	5
SYNPO2	6.14692e-15	1.2525	0.452	0.022	8.42374e-11	5
PDLIM5	7.19292e-15	1.37866	0.484	0.038	9.85718e-11	5
RPLP1	8.78661e-15	0.636482	1	0.999	1.20412e-10	5
LGI4	1.06624e-14	1.01083	0.387	0.011	1.46118e-10	5
HSPB2	1.32532e-14	1.45863	0.71	0.155	1.81622e-10	5
TRDN	4.74923e-14	1.10769	0.935	0.478	6.50835e-10	5
SNX7	8.01472e-14	1.22169	0.613	0.08	1.09834e-09	5
RBFOX1	9.91933e-14	1.13364	0.355	0.012	1.35934e-09	5
GADD45A	1.05707e-13	1.40338	0.774	0.228	1.44861e-09	5
PACSIN3	1.64907e-13	1.22477	0.484	0.034	2.25988e-09	5
PDK4	1.92131e-13	1.31985	0.774	0.295	2.63296e-09	5
JPH1	2.32596e-13	1.12858	0.323	0.009	3.18749e-09	5
PTP4A3	3.95548e-13	1.21301	0.419	0.022	5.42059e-09	5
RRAD	8.20066e-13	1.80647	0.581	0.089	1.12382e-08	5
GAPDH	1.63011e-12	0.891386	1	0.969	2.2339e-08	5
FBXO32	1.66348e-12	1.45437	0.581	0.101	2.27963e-08	5
MYOD1	1.82321e-12	0.992323	0.452	0.032	2.49853e-08	5
UBAC1	2.52511e-12	1.1796	0.516	0.052	3.46041e-08	5
SEMA6C	3.15305e-12	1.2203	0.29	0.006	4.32094e-08	5
UBE2G1	4.1243e-12	1.20012	0.516	0.053	5.65194e-08	5
CALM1	4.39666e-12	1.17296	0.839	0.408	6.02518e-08	5
CDC42EP3	1.22951e-11	1.1511	0.452	0.046	1.68492e-07	5
HSPB7	1.42622e-11	0.961651	0.29	0.007	1.95449e-07	5
HSPB6	1.90505e-11	1.31698	0.387	0.026	2.61069e-07	5
PERP	3.59999e-11	1.31057	0.484	0.052	4.93343e-07	5
ATP1A2	1.21926e-10	0.979779	0.452	0.044	1.67087e-06	5
BLCAP	1.44086e-10	1.08454	0.484	0.055	1.97455e-06	5
RYR1	2.10233e-10	0.606707	0.258	0.007	2.88104e-06	5
USP13	2.31141e-10	0.879464	0.323	0.015	3.16755e-06	5
DUSP27	2.40977e-10	0.748071	0.29	0.011	3.30234e-06	5
MLTK	2.65839e-10	1.06314	0.516	0.076	3.64306e-06	5
LRRC28	2.96567e-10	0.914258	0.355	0.022	4.06416e-06	5
MAP4	3.12281e-10	1.05582	0.613	0.119	4.27949e-06	5
TCEA3	4.94091e-10	1.18527	0.677	0.178	6.77103e-06	5
GADD45G	8.26663e-10	1.11676	0.581	0.103	1.13286e-05	5
MSI2	8.27987e-10	0.832996	0.387	0.032	1.13467e-05	5
LMO7	9.02551e-10	0.907309	0.387	0.032	1.23686e-05	5
YBX1	9.43866e-10	0.757163	0.968	0.79	1.29347e-05	5
SRPK3	1.16411e-09	1.15842	0.387	0.033	1.5953e-05	5
PKIG	1.34847e-09	1.15782	0.452	0.07	1.84794e-05	5
FST	1.41301e-09	0.968028	0.387	0.035	1.93639e-05	5
TXLNB	2.34627e-09	0.694613	0.258	0.009	3.21533e-05	5
NEAT1	2.72411e-09	0.930154	0.935	0.527	3.73313e-05	5
PDLIM3	4.28934e-09	0.984309	0.839	0.364	5.87811e-05	5
PGM1	5.09693e-09	0.965948	0.484	0.071	6.98484e-05	5
DRG1	7.74567e-09	0.866673	0.548	0.103	0.000106147	5
KIF1B	8.13361e-09	0.922846	0.387	0.041	0.000111463	5
PHLDA3	8.37552e-09	0.871799	0.613	0.138	0.000114778	5
IDH2	1.0401e-08	1.36	0.516	0.14	0.000142535	5
MYF6	1.04306e-08	0.955641	0.839	0.478	0.000142941	5
MAGED2	1.86681e-08	0.979081	0.742	0.268	0.000255828	5
AGL	2.54808e-08	0.60368	0.258	0.013	0.000349189	5
OSBPL1A	2.67392e-08	0.803466	0.387	0.045	0.000366434	5
EFCAB7	2.80987e-08	0.870499	0.258	0.012	0.000385065	5
PM20D2	2.85931e-08	0.873175	0.323	0.026	0.000391839	5
GYG1	3.10191e-08	1.03335	0.548	0.113	0.000425086	5
PMAIP1	3.31113e-08	1.0219	0.323	0.028	0.000453757	5
MKRN1	6.06379e-08	0.83151	0.548	0.118	0.000830981	5
CRYAB	8.67378e-08	0.809727	0.968	0.744	0.00118865	5
SVIL	8.74315e-08	0.958536	0.387	0.05	0.00119816	5
PTP4A1	1.09067e-07	1.07931	0.452	0.1	0.00149466	5
ELN	1.55264e-07	0.665905	0.258	0.016	0.00212774	5
CYB5R1	1.5545e-07	0.935591	0.613	0.172	0.00213029	5
RNF115	1.71708e-07	0.894905	0.452	0.078	0.00235308	5
COPZ2	2.4398e-07	0.620544	0.258	0.017	0.0033435	5
A4GALT	2.81273e-07	0.492398	0.258	0.022	0.00385457	5
OTUD1	2.85922e-07	0.669466	0.29	0.025	0.00391828	5
NDUFA4	2.92436e-07	0.764533	0.903	0.617	0.00400755	5
CSNK1A1	4.05966e-07	0.954014	0.613	0.205	0.00556335	5
NDUFB9	4.24182e-07	0.829435	0.839	0.458	0.00581299	5
EEF2	4.3763e-07	0.6151	0.968	0.844	0.00599728	5
STAC3	7.23238e-07	0.8918	0.742	0.319	0.00991125	5
ATP2A2	8.14155e-07	0.950668	0.29	0.033	0.0111572	5
TAF7	1.03565e-06	0.814289	0.839	0.399	0.0141925	5
FITM1	1.09373e-06	0.935785	0.548	0.149	0.0149885	5
PFKM	1.15992e-06	1.00511	0.387	0.077	0.0158955	5
LIMCH1	1.427e-06	0.744691	0.258	0.021	0.0195556	5
CORO6	1.59766e-06	0.791144	0.355	0.051	0.0218943	5
ATP5G2	1.74047e-06	0.587666	0.903	0.777	0.0238514	5
PSMA7	1.75913e-06	0.83512	0.806	0.465	0.0241071	5
ADRM1	1.95097e-06	0.920675	0.516	0.152	0.0267361	5
HSDL2	2.08316e-06	1.04418	0.29	0.042	0.0285476	5
TSPAN7	2.42485e-06	0.78195	0.29	0.031	0.0332301	5
ALDH2	2.64496e-06	0.86188	0.484	0.114	0.0362466	5
LMO2	3.13504e-06	0.960015	0.29	0.035	0.0429626	5
GMPR	3.16837e-06	0.581794	0.258	0.026	0.0434194	5
COX17	3.20882e-06	0.9654	0.484	0.14	0.0439737	5
UQCR11.1	3.25454e-06	0.865944	0.71	0.359	0.0446003	5
TMEM38B	3.31636e-06	1.00481	0.323	0.05	0.0454474	5
C10orf10	3.55638e-06	0.818813	0.516	0.139	0.0487367	5
SYNC	3.93842e-06	0.699814	0.258	0.024	0.0539721	5
MRPS7	4.77185e-06	0.618589	0.484	0.127	0.0653934	5
SMC5	5.01771e-06	0.682977	0.355	0.059	0.0687627	5
ASB8	5.87668e-06	0.639904	0.355	0.064	0.080534	5
UQCR10	6.14535e-06	0.795516	0.613	0.224	0.0842158	5
FIS1	6.15651e-06	0.707053	0.774	0.39	0.0843689	5
PHPT1	7.13241e-06	0.838506	0.71	0.308	0.0977426	5
DNAJB6	7.67153e-06	0.405491	0.742	0.348	0.105131	5
FDXR	7.90012e-06	0.815637	0.258	0.029	0.108263	5
FOXO1	8.60194e-06	0.557723	0.452	0.124	0.117881	5
TMEM134	8.88828e-06	0.797957	0.387	0.078	0.121805	5
SNAPIN	9.03896e-06	0.718842	0.419	0.091	0.12387	5
YPEL3	1.0595e-05	0.642658	0.548	0.171	0.145193	5
NDUFS2	1.10065e-05	0.675839	0.548	0.172	0.150833	5
CDKN1A	1.30285e-05	0.637806	0.677	0.269	0.178543	5
SMYD4	1.47992e-05	0.853159	0.323	0.052	0.202808	5
MYL5	1.61394e-05	0.675782	0.29	0.04	0.221174	5
SRRM2	1.8872e-05	0.620459	0.677	0.273	0.258622	5
EIF4E2	1.94525e-05	0.7988	0.452	0.123	0.266578	5
NDUFA3	2.29729e-05	0.517183	0.452	0.128	0.314821	5
CFL2	2.57083e-05	0.701306	0.581	0.202	0.352307	5
TRIM55	2.7888e-05	0.628632	0.29	0.043	0.382177	5
PDAP1	2.86323e-05	0.762722	0.581	0.209	0.392377	5
PRDX6	3.10733e-05	0.708931	0.806	0.499	0.425829	5
CPEB4	3.4881e-05	0.889523	0.258	0.04	0.478009	5
ATP5J2	4.19725e-05	0.651819	0.742	0.348	0.575192	5
NDUFA7.1	4.20094e-05	0.644364	0.355	0.073	0.575697	5
HSPA8	5.13911e-05	0.541968	0.968	0.673	0.704263	5
PSMB5	5.32372e-05	0.694029	0.645	0.265	0.729563	5
PPP1R14C	5.78115e-05	0.612853	0.355	0.078	0.792248	5
CCNG1	6.06674e-05	0.810372	0.516	0.176	0.831386	5
ZFAND5	7.05026e-05	0.780497	0.613	0.258	0.966168	5
ADSL	7.54853e-05	0.515642	0.419	0.116	1	5
TUBA4A	8.62377e-05	0.395432	0.323	0.078	1	5
CAV3	8.63121e-05	0.814636	0.29	0.051	1	5
COX5B	8.92042e-05	0.513202	0.871	0.515	1	5
CNBP	9.51308e-05	0.503523	0.968	0.783	1	5
DGCR6	0.000106059	0.788936	0.387	0.099	1	5
ADI1	0.000110197	0.920847	0.419	0.134	1	5
GPX1	0.000111776	0.729361	0.742	0.377	1	5
NDUFB7	0.000114607	0.539954	0.742	0.365	1	5
JAK1	0.000120006	0.623869	0.419	0.117	1	5
PDE4B	0.000127848	0.345047	0.387	0.133	1	5
MIF4GD	0.000139665	0.654136	0.29	0.054	1	5
ANAPC16	0.000140518	0.467022	0.806	0.437	1	5
ACTR1A	0.000148254	0.492731	0.258	0.044	1	5
SURF1	0.00014942	0.729239	0.484	0.163	1	5
PNISR	0.000150833	0.676113	0.677	0.316	1	5
FLNC	0.000157716	0.621488	0.258	0.041	1	5
ZNF428	0.000165042	0.798297	0.516	0.195	1	5
KPNA3	0.000169272	0.699044	0.258	0.042	1	5
PLIN3	0.00018247	0.622599	0.484	0.162	1	5
CSDE1	0.000183968	0.656147	0.71	0.375	1	5
KLF13	0.000209501	0.580565	0.29	0.056	1	5
DNTTIP1	0.000222096	0.695546	0.323	0.075	1	5
DUSP23	0.000258406	0.828002	0.323	0.082	1	5
CEBPG	0.000259084	0.584614	0.258	0.044	1	5
MAP1LC3B	0.000277627	1.01248	0.645	0.303	1	5
MBNL1	0.000283058	0.510797	0.29	0.063	1	5
DYNC1LI2	0.000286144	0.605585	0.387	0.11	1	5
RTN4	0.000292252	0.603519	0.806	0.55	1	5
NDUFA5	0.000292442	0.420032	0.613	0.281	1	5
MRPL40	0.000300071	0.442211	0.452	0.162	1	5
LSM4	0.000300824	0.666412	0.452	0.148	1	5
NDUFV3	0.000305102	0.650946	0.355	0.09	1	5
HAGH	0.000326639	0.398609	0.355	0.113	1	5
HNRNPU	0.000360287	0.358843	0.645	0.322	1	5
ZBTB16	0.000364846	0.797904	0.419	0.139	1	5
CUTC	0.000393379	0.630984	0.355	0.093	1	5
BEST3	0.000405642	0.663192	0.258	0.047	1	5
ALDOA	0.000413888	0.573178	0.871	0.604	1	5
UBC	0.000423352	0.352522	1	0.948	1	5
UQCC2	0.000436533	0.504218	0.258	0.048	1	5
FKBP3	0.000447053	0.681907	0.387	0.113	1	5
MAP7D1	0.000480534	0.560247	0.323	0.078	1	5
VPS36	0.000485431	0.532281	0.258	0.05	1	5
PPDPF	0.000505229	0.580538	0.774	0.451	1	5
AP2S1	0.000513421	0.571187	0.452	0.155	1	5
NAA50	0.00052806	0.535372	0.29	0.064	1	5
ATP5J	0.000574454	0.656046	0.742	0.432	1	5
FUBP1	0.000575334	0.430216	0.29	0.071	1	5
ASAH1	0.000622446	0.259595	0.452	0.202	1	5
EIF1AY	0.000636358	0.715833	0.323	0.088	1	5
ATP5H	0.000638562	0.38328	0.71	0.38	1	5
SDHA	0.000658061	0.361097	0.355	0.119	1	5
ECH1	0.000665758	0.654456	0.613	0.348	1	5
COX8A	0.000720299	0.481271	0.71	0.372	1	5
NDUFC1	0.00076168	0.64123	0.581	0.257	1	5
NFE2L1	0.000781014	0.535685	0.258	0.053	1	5
IER5	0.000808261	0.660235	0.387	0.122	1	5
SYNGR2	0.000825445	0.570071	0.29	0.067	1	5
OAZ1	0.00083046	0.403524	0.968	0.762	1	5
LINC00938	0.000832729	0.565311	0.29	0.069	1	5
TUBB	0.000871208	0.496367	0.806	0.493	1	5
POLR2I	0.000929175	0.732558	0.516	0.256	1	5
MORF4L1	0.000951965	0.324406	0.71	0.406	1	5
N4BP2L1	0.000957137	0.483384	0.419	0.157	1	5
RAB10	0.000992842	0.795869	0.484	0.193	1	5
TECR	0.00101951	0.606544	0.548	0.24	1	5
PSMD4	0.00111164	0.721359	0.581	0.291	1	5
SLC25A3	0.00112777	0.417401	0.935	0.7	1	5
HADHB	0.0011371	0.44194	0.484	0.197	1	5
PPP1CA	0.00115698	0.494599	0.516	0.217	1	5
UQCRQ	0.0012075	0.638804	0.645	0.327	1	5
SNRNP25	0.00132877	0.521218	0.323	0.091	1	5
EIF4A2	0.00145067	0.448063	0.903	0.734	1	5
STARD7	0.00153302	0.426215	0.258	0.061	1	5
GBAS	0.00156329	0.52838	0.419	0.152	1	5
TSSC4	0.00158796	0.262526	0.323	0.125	1	5
USMG5	0.00161395	0.680531	0.516	0.235	1	5
PFDN2	0.00165254	0.568778	0.548	0.252	1	5
NFIX	0.00171341	0.557918	0.419	0.151	1	5
COX14	0.00187668	0.548716	0.355	0.114	1	5
C19orf48	0.00206026	0.502912	0.323	0.095	1	5
ILF3-AS1	0.00215696	0.374595	0.29	0.097	1	5
ACYP2	0.00227898	0.548268	0.258	0.063	1	5
NDUFS3	0.002477	0.482997	0.452	0.181	1	5
CDH13	0.00250072	0.63411	0.323	0.109	1	5
SETD5-AS1	0.00251964	0.477229	0.355	0.118	1	5
PDCD5	0.0026062	0.31395	0.452	0.207	1	5
TP53I3	0.00263128	0.570606	0.258	0.065	1	5
DCXR	0.00266361	0.268137	0.355	0.155	1	5
RPL37A	0.0027671	0.307622	1	0.976	1	5
COX5A	0.00289851	0.396452	0.548	0.265	1	5
GAS6	0.00290068	0.324068	0.29	0.108	1	5
MRPS6	0.00304863	0.504577	0.258	0.064	1	5
FHL3	0.00309168	0.488629	0.323	0.099	1	5
CLTB	0.00344991	0.596274	0.419	0.164	1	5
ANAPC11	0.00358988	0.567807	0.548	0.275	1	5
PITX2	0.00383976	0.710562	0.323	0.103	1	5
CTA-29F11.1	0.00393848	0.409734	0.29	0.094	1	5
PLIN2	0.0040074	0.270385	0.323	0.124	1	5
SET	0.00415996	0.587325	0.419	0.166	1	5
EMC10	0.00417789	0.522234	0.355	0.124	1	5
PRKAR1A	0.00430055	0.571855	0.516	0.309	1	5
CRLS1	0.004321	0.442324	0.258	0.069	1	5
HMGB2	0.0045516	0.756142	0.613	0.324	1	5
RPS19BP1	0.00461454	0.324338	0.452	0.213	1	5
GTF3C6	0.00467504	0.529049	0.323	0.105	1	5
CHCHD10	0.00497818	0.556319	0.613	0.328	1	5
S100A13	0.004984	0.694937	0.677	0.494	1	5
PABPN1	0.0051312	0.56758	0.258	0.078	1	5
COX20	0.00519184	0.39602	0.29	0.095	1	5
PDHA1	0.00521957	0.601183	0.323	0.107	1	5
CHD4	0.00532939	0.58134	0.29	0.097	1	5
ALDH3A2	0.00583908	0.458395	0.355	0.132	1	5
CYCS	0.00592884	0.291925	0.484	0.245	1	5
TCEB2	0.00607727	0.448622	0.742	0.463	1	5
NUTF2	0.00623962	0.957227	0.355	0.139	1	5
GBE1	0.00650352	0.592698	0.29	0.09	1	5
PHF20	0.00673439	0.617465	0.29	0.09	1	5
GPX4	0.00687074	0.442161	0.839	0.653	1	5
HINT1	0.00713036	0.403544	0.742	0.469	1	5
SRP54	0.00777146	0.322929	0.258	0.084	1	5
C1orf43	0.00777919	0.590736	0.516	0.277	1	5
C17orf89	0.00788546	0.414923	0.355	0.138	1	5
NDUFS5	0.00809907	0.313189	0.839	0.58	1	5
PCMT1	0.00876219	0.33709	0.516	0.26	1	5
FBXW5	0.00924917	0.57533	0.258	0.088	1	5
RAB18	0.00994002	0.595748	0.355	0.16	1	5
