# Supplementary material for: Functionally heterogeneous human satellite cells identified by single cell RNA sequencing
Source: eLife. 2020 Apr 1;9:e51576. doi: 10.7554/eLife.51576 (PMC7164960; doi:10.7554/eLife.51576)
Supplement: Supplementary file 3. [file elife-51576-supp3.xlsx]

## Sheet: Supplemental Table S25_Hey1Spry
gene	p_val	avg_logFC	pct.1	pct.2	p_val_adj
SPRY1	0	1.75461	1	0.305	0
HEY1	0	1.3091	1	0.202	0
CDKN1C	0	0.813828	0.842	0.495	0
TAGLN	0	0.749313	0.543	0.281	0
CITED4	0	0.545894	0.689	0.367	0
MYF5	0	0.519894	0.905	0.622	0
CHRDL2	0	0.49745	0.82	0.558	0
DLK1	0	0.492638	0.879	0.79	0
FAM132B	0	0.476047	0.369	0.14	0
FN1	0	0.454211	0.75	0.508	0
MYF6	0	0.439823	0.788	0.497	0
GAS1	0	0.437868	0.756	0.465	0
RPS26	0	0.426907	0.989	0.899	0
CXXC5	0	0.411645	0.814	0.505	0
PEG10	0	0.405528	0.578	0.341	0
LTBP4	0	0.402987	0.803	0.563	0
BRI3	0	0.3887	0.855	0.582	0
ADAMTS5	0	0.388549	0.424	0.175	0
TXNIP	0	0.382407	0.933	0.717	0
MTRNR2L12	0	0.371638	0.982	0.7	0
PHLDA3	0	0.359064	0.51	0.26	0
PLCG2	0	0.35244	0.73	0.523	0
MXRA8	0	0.348383	0.728	0.468	0
MXRA7	0	0.344023	0.821	0.555	0
GNAS	0	0.342535	0.997	0.889	0
RPL41	0	0.341331	0.999	0.942	0
RXRG	0	0.325733	0.543	0.31	0
PDGFA	0	0.317982	0.372	0.148	0
CHRNA1	0	0.314961	0.821	0.608	0
RPS17	0	0.312211	0.923	0.655	0
PDLIM4	0	0.307572	0.839	0.637	0
MBP	0	0.306484	0.595	0.343	0
H3F3A	0	0.30111	0.987	0.725	0
TCF4	0	0.300847	0.819	0.589	0
GNAI2	0	0.292888	0.71	0.479	0
RRAS	0	0.292363	0.538	0.31	0
P4HA2	0	0.288934	0.622	0.386	0
DBP	0	0.288678	0.374	0.157	0
FGFR4	0	0.287539	0.805	0.581	0
YPEL3	0	0.28211	0.684	0.448	0
SARAF	0	0.280538	0.82	0.558	0
CD81	0	0.28012	0.96	0.7	0
SYTL2	0	0.274594	0.327	0.137	0
C9orf3	0	0.271208	0.667	0.441	0
CD151	0	0.270178	0.696	0.481	0
VEGFB	0	0.269907	0.592	0.378	0
RPL39	0	0.269705	0.998	0.925	0
KANK2	0	0.269059	0.575	0.351	0
LGALS3	0	0.267937	0.86	0.665	0
S100A4	0	0.266436	0.995	0.948	0
SIX1	0	0.265835	0.6	0.356	0
PAX7	0	0.260828	0.849	0.643	0
PROX1	0	0.258375	0.548	0.329	0
NOTCH3	0	0.255447	0.611	0.38	0
GLIPR2	0	0.255113	0.48	0.27	0
ARL6IP5	0	0.253651	0.879	0.669	0
HMGN2	0	0.252649	0.948	0.707	0
S100A13	0	0.25234	0.799	0.611	0
DDAH2	0	0.252107	0.785	0.572	0
SLC25A6	0	-0.264802	0.971	0.955	0
FTH1	0	-0.272841	0.999	0.995	0
HNRNPDL	0	-0.287092	0.904	0.886	0
UBB	0	-0.291746	0.946	0.927	0
TPD52L1	0	-0.298572	0.675	0.684	0
RPL21	0	-0.300914	0.999	0.997	0
ANXA1	0	-0.32341	0.837	0.762	0
LMNA	0	-0.329083	0.934	0.878	0
RPLP2	0	-0.329168	0.999	0.997	0
RHOBTB3	0	-0.329723	0.804	0.813	0
DDX21	0	-0.334107	0.606	0.6	0
DDX5	0	-0.335519	0.974	0.947	0
RPS6	0	-0.360712	0.999	0.999	0
CDC42EP4	0	-0.362961	0.481	0.562	0
TRDN	0	-0.374272	0.65	0.741	0
CYCS	0	-0.375078	0.522	0.572	0
RPL17	0	-0.410293	0.626	0.651	0
MTRNR2L8	0	-0.410413	0.676	0.477	0
TMBIM4.1	0	-0.414193	0.005	0.101	0
NHP2L1	0	-0.439857	0.004	0.108	0
UQCR11.1	0	-0.445375	0.004	0.107	0
ZBTB16	0	-0.446809	0.572	0.667	0
VIMP	0	-0.459381	0.648	0.692	0
SF3B14	0	-0.466144	0.004	0.117	0
ELL2	0	-0.471107	0.338	0.459	0
FKBP5	0	-0.49345	0.546	0.651	0
MT1E	0	-0.553664	0.898	0.899	0
ZFAND5	0	-0.565785	0.817	0.882	0
C1orf63	0	-0.588367	0.005	0.12	0
TMEM66	0	-0.591629	0.005	0.137	0
RPL7	0	-0.611671	0.997	0.995	0
RPL13A	0	-0.665954	0.997	0.994	0
U2AF1	0	-0.687135	0.145	0.295	0
MT2A	0	-0.716228	0.978	0.961	0
EIF4A1	0	-0.723617	0.735	0.811	0
MT1X	0	-0.764922	0.984	0.991	0
RPL31	0	-0.916667	0.973	0.977	0
MT1A	0	-0.946329	0.475	0.594	0
SOD2	0	-1.01305	0.615	0.648	0
MT1M	1.97626258336499e-323	-0.5007	0.856	0.847	4.3327580877694e-319
PLAC9	4.99006302299659e-322	0.362764	0.494	0.297	1.09402141716177e-317
MLF1	4.62939510153248e-321	-0.391352	0.195	0.294	1.01494858205998e-316
TGFBI	3.82840700801631e-315	-0.325189	0.383	0.408	8.39339952437495e-311
RPS20	3.81e-308	-0.395523	0.964	0.962	8.36e-304
PALLD	1.37e-307	0.267977	0.558	0.356	3e-303
UBC	1.01e-306	-0.312313	0.995	0.983	2.22e-302
SAT1	2.73e-306	-0.339738	0.782	0.759	5.99e-302
CHODL	4.95e-305	0.265605	0.31	0.139	1.09e-300
PPP1R15A	7.08e-300	-0.322882	0.751	0.752	1.55e-295
CHD1	9.43e-292	-0.291499	0.391	0.424	2.07e-287
MTHFD2	8.86e-289	-0.378084	0.237	0.371	1.94e-284
RPL36A	2.63e-288	-0.381021	0.905	0.902	5.77e-284
CDKN1A	2.84e-279	-0.334106	0.441	0.504	6.23e-275
ARID5B	2.39e-277	-0.329108	0.622	0.608	5.24e-273
KLF6	5.87e-266	0.252515	0.617	0.425	1.29e-261
TPPP3	6.14e-263	-0.553449	0.315	0.327	1.35e-258
NFKBIA	3.77e-262	-0.297088	0.96	0.929	8.26e-258
RBMX	5.76e-262	-0.252331	0.728	0.719	1.26e-257
CAMK2N1	2.36e-254	0.2515	0.601	0.416	5.17e-250
GPX3	4.41e-248	-0.256893	0.447	0.383	9.66e-244
PDK4	4.64e-243	-0.367239	0.435	0.523	1.02e-238
C10orf10	9.82e-237	0.264838	0.363	0.2	2.15e-232
LDLR	4.15e-236	-0.276689	0.175	0.219	9.1e-232
COL1A2	2.13e-235	0.251656	0.546	0.366	4.66e-231
NAMPT	3.14e-235	-0.266524	0.332	0.351	6.88e-231
NR4A1	1.77e-234	-0.329544	0.539	0.576	3.87e-230
NFATC2	6.39e-225	-0.251098	0.037	0.113	1.4e-220
MAFF	9.78e-224	-0.276835	0.494	0.494	2.14e-219
EMP1	4.25e-223	-0.383901	0.066	0.14	9.32e-219
TIPARP	1.24e-213	-0.302523	0.457	0.508	2.72e-209
ID2	1.45e-210	-0.411657	0.408	0.417	3.18e-206
HMGB3	1.15e-208	-0.308142	0.123	0.2	2.51e-204
CYR61	4.8e-202	0.29567	0.749	0.599	1.05e-197
CSRNP1	6.37e-197	-0.255	0.425	0.471	1.4e-192
NPTX2	2.89e-193	-0.270284	0.209	0.237	6.34e-189
BAZ1A	2.86e-192	-0.25992	0.196	0.248	6.27e-188
NNMT	1.67e-189	-0.288945	0.909	0.854	3.66e-185
KLF4	1.43e-183	-0.28082	0.671	0.686	3.13e-179
APOC1	4.56e-181	0.256955	0.987	0.96	9.99e-177
KCNQ1OT1	1.13e-180	0.259347	0.789	0.655	2.47e-176
DNAJA1	3.87e-171	-0.253116	0.778	0.753	8.49e-167
RGS2	3.52e-166	-0.288783	0.149	0.203	7.73e-162
GADD45G	1.29e-148	-0.392813	0.277	0.391	2.83e-144
C11orf96	3.06e-144	-0.381369	0.364	0.315	6.7e-140
CXCL2	2.01e-134	-0.291998	0.063	0.119	4.42e-130
ANGPTL4	1.9e-112	-0.261315	0.264	0.357	4.17e-108
MT1G	9.33e-101	-0.384928	0.13	0.19	2.05e-96
CTGF	7.13e-67	-0.263325	0.396	0.385	1.56e-62
