# Supplementary material for: Functionally heterogeneous human satellite cells identified by single cell RNA sequencing
Source: eLife. 2020 Apr 1;9:e51576. doi: 10.7554/eLife.51576 (PMC7164960; doi:10.7554/eLife.51576)
Supplement: Supplementary file 4. [file elife-51576-supp4.xlsx]

## Sheet: Supplemental Table S26_CAV1
gene	p_val	avg_logFC	pct.1	pct.2	p_val_adj
CAV1	0	1.55189	1	0.533	0
S100A10	0	0.776838	0.933	0.904	0
ANXA2	0	0.536482	0.914	0.894	0
S100A3	0	0.536131	0.299	0.1	0
S100A6	0	0.494939	0.997	0.997	0
S100A4	0	0.426805	0.984	0.981	0
VIM	0	0.364262	0.996	0.998	0
THY1	0	0.360495	0.233	0.066	0
VCAM1	0	0.341954	0.155	0.027	0
COL1A1	9.97e-296	0.507976	0.29	0.104	2.19e-291
TMSB10	4.97e-244	0.436966	0.978	0.974	1.09e-239
EMP3	3.43e-217	0.493057	0.663	0.514	7.51e-213
CXCL14	1.25e-206	-0.381637	0.91	0.974	2.73e-202
LGALS3	5.29e-206	0.382223	0.861	0.786	1.16e-201
IGFBP5	1.15e-199	-0.335278	0.939	0.977	2.52e-195
COL6A2	1.81e-187	0.476375	0.777	0.726	3.96e-183
CSRP2	1.84e-183	-0.353179	0.638	0.812	4.04e-179
LRRC17	2.05e-178	0.259377	0.187	0.066	4.49e-174
COL1A2	1.34e-171	0.523308	0.637	0.492	2.94e-167
PKM	3.21e-166	0.469636	0.701	0.612	7.03e-162
LGALS1	4.48e-165	0.290766	0.98	0.979	9.82e-161
CD9	8.19e-163	0.318526	0.913	0.902	1.8e-158
TPPP3	4.63e-156	0.516057	0.483	0.309	1.02e-151
IGFBP6	6.87e-156	0.625194	0.339	0.183	1.51e-151
FOSB	2.7e-150	-0.323597	0.905	0.95	5.91e-146
CD44	7e-146	0.373431	0.473	0.31	1.53e-141
DKK3	5.26e-145	0.313386	0.279	0.139	1.15e-140
TIMP1	1.1e-139	0.414375	0.8	0.744	2.41e-135
PTRF	9.38e-137	0.346413	0.697	0.593	2.06e-132
GSN	1.01e-131	0.348229	0.784	0.71	2.21e-127
JUND	1.21e-130	-0.329325	0.915	0.933	2.66e-126
CD82	4.1e-123	0.342809	0.71	0.621	9e-119
ANXA1	4.95e-122	0.328628	0.863	0.818	1.09e-117
TRDN	3.42e-118	-0.335133	0.55	0.72	7.5e-114
CD151	6.01e-117	0.295523	0.713	0.619	1.32e-112
GPX4	9.47e-115	0.279886	0.853	0.825	2.08e-110
COL6A1	1.62e-112	0.376492	0.624	0.521	3.55e-108
S100A13	8.99e-112	0.290629	0.797	0.737	1.97e-107
CAPN2	1.43e-108	0.312759	0.587	0.47	3.14e-104
STAC3	5.52e-99	-0.303276	0.519	0.663	1.21e-94
GLIPR2	8.41e-95	0.266448	0.526	0.396	1.84e-90
S100A16	1.8e-91	0.297345	0.438	0.313	3.95e-87
COL18A1	1.24e-90	0.279539	0.728	0.664	2.73e-86
PTGDS	1.96e-89	-0.342267	0.598	0.736	4.29e-85
CHRDL2	2.02e-88	-0.274683	0.596	0.729	4.44e-84
TUBA1C	5.24e-87	0.254585	0.354	0.227	1.15e-82
KLF4	3.78e-85	-0.284969	0.556	0.685	8.28e-81
SH3BGRL3	7.77e-84	0.336554	0.497	0.395	1.7e-79
PFN1	1.5e-83	0.292843	0.809	0.78	3.3e-79
KLF2	4.59e-83	-0.281438	0.748	0.824	1.01e-78
TMSB4X	9.2e-83	0.381566	0.846	0.819	2.02e-78
S100A11	2.53e-81	0.275	0.831	0.81	5.54e-77
COL3A1	6.48e-80	0.419337	0.581	0.487	1.42e-75
KLF6	2.47e-73	0.320288	0.652	0.55	5.42e-69
DNAJA1	2.05e-64	-0.287042	0.696	0.774	4.48e-60
NPPC	7.29e-64	-0.283555	0.103	0.218	1.6e-59
MGP	2.05e-53	0.537649	0.608	0.557	4.5e-49
MAFF	1.18e-46	-0.254214	0.408	0.509	2.59e-42
IGFBP2	9.3e-46	0.285373	0.203	0.128	2.04e-41
CTGF	4.46e-40	0.40279	0.493	0.407	9.79e-36
CCL2	9.93e-40	0.386175	0.306	0.224	2.18e-35
PSME2	2.32e-32	0.25422	0.487	0.433	5.1e-28
TYMP	2.23e-31	0.322795	0.5	0.452	4.88e-27
TAGLN	1.6e-27	0.353041	0.506	0.443	3.51e-23
FABP5	2.57e-26	0.275234	0.328	0.261	5.63e-22
MTRNR2L8	1.24e-14	-0.359346	0.575	0.616	2.71e-10
