# Supplementary material for: Functionally heterogeneous human satellite cells identified by single cell RNA sequencing
Source: eLife. 2020 Apr 1;9:e51576. doi: 10.7554/eLife.51576 (PMC7164960; doi:10.7554/eLife.51576)
Supplement: Supplementary file 5. [file elife-51576-supp5.xlsx]

## Sheet: Muscle used
Figure 2b,c and Figure 5b,c
Muscle	Age	Sex
Vastus Lateralis	73	F
Rectus Abdominis	46	F
Vastus Lateralis	59	M
Figure 3d (Sprouty 1)
Muscle	Age	Sex
Gracilis	37	F
Gracilis	45	F
Gracilis	65	M
Vastus Lateralis	50	M
Figure 5f (CAV1 gene expression)
Muscle	Age	Sex
Extensor Digitorium Longus	63	M
Rectus Abdominis	67	F
Tensor Fascia Latae	73	M
Figure 5h (Time to first division)
Muscle	Age	Sex
Pectoralis Major	46	M
Pectoralis Major	37	F
Latissimus	61	F
Rectus Abdominis	41	F
Figure 5i (KI67)
Muscle	Age	Sex
Latissimus	61	F
Pectoralis Major	16	F
Temporalis	26	M
Figure 5k (MYOD)
Muscle	Age	Sex
Vastus Lateralis	66	M
Temporalis	20	F
Vastus Lateralis	83	M
Gracilis	58	F
Figure 6 (Transplant)
Muscle	Age	Sex
Rectus Abdominis	46	F
Flexor Hallucis Longus	59	M
Vastus Lateralis	64	M
