# Supplementary figures and images for: Functionally heterogeneous human satellite cells identified by single cell RNA sequencing
Source: eLife journal article supplement (doi:10.7554/elife.51576), 2020-04-01

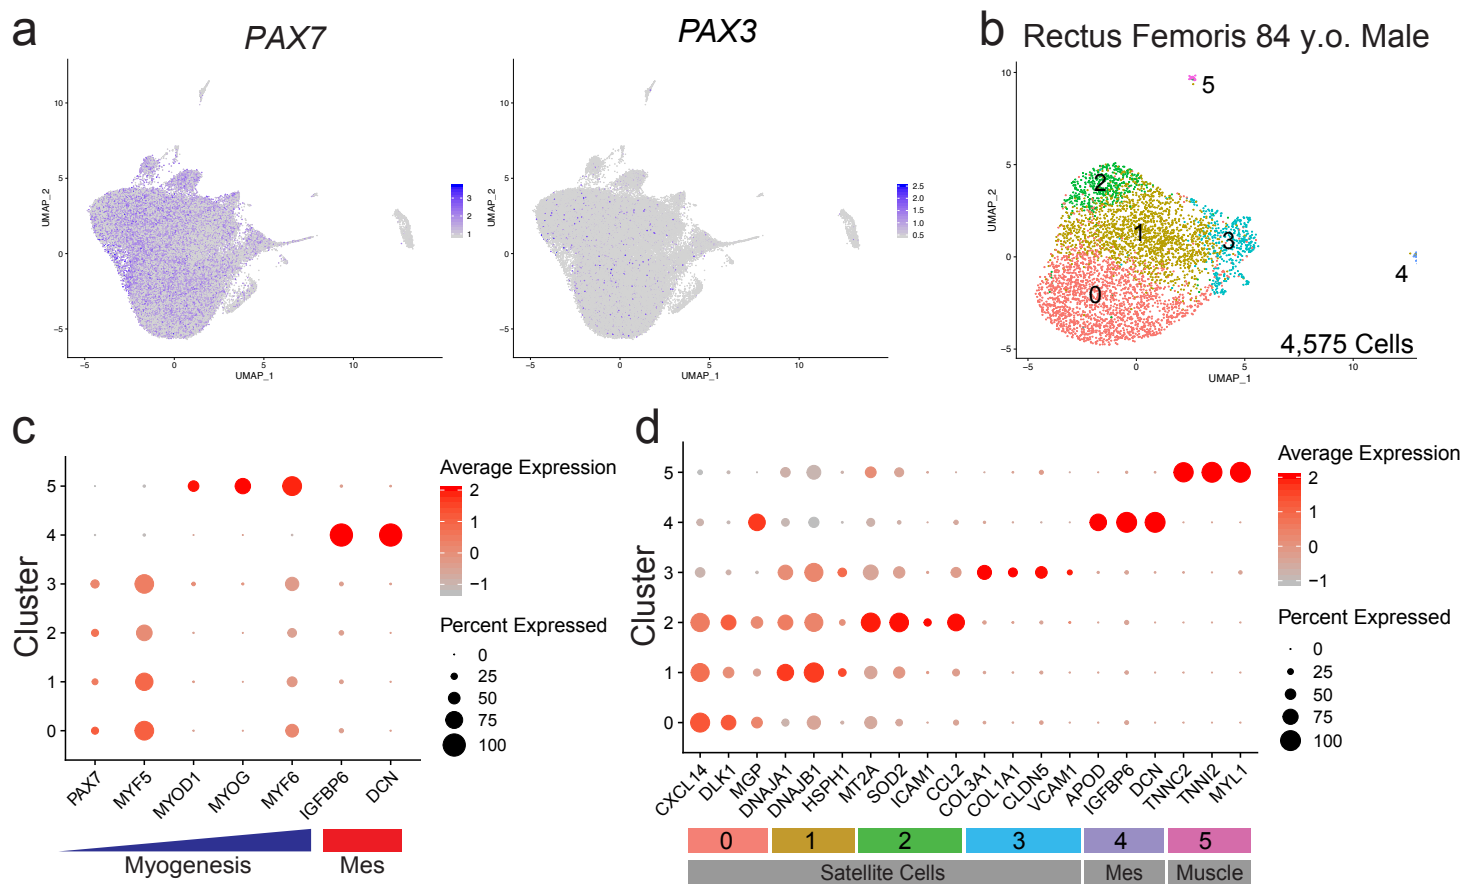

Figure 1-figure supplement 2

Supplement: supp [file elife_poa_e51576_Figure_1_figure_supplement_2.pdf › elife_poa_e51576_Figure_1_figure_supplement_2.pdf]

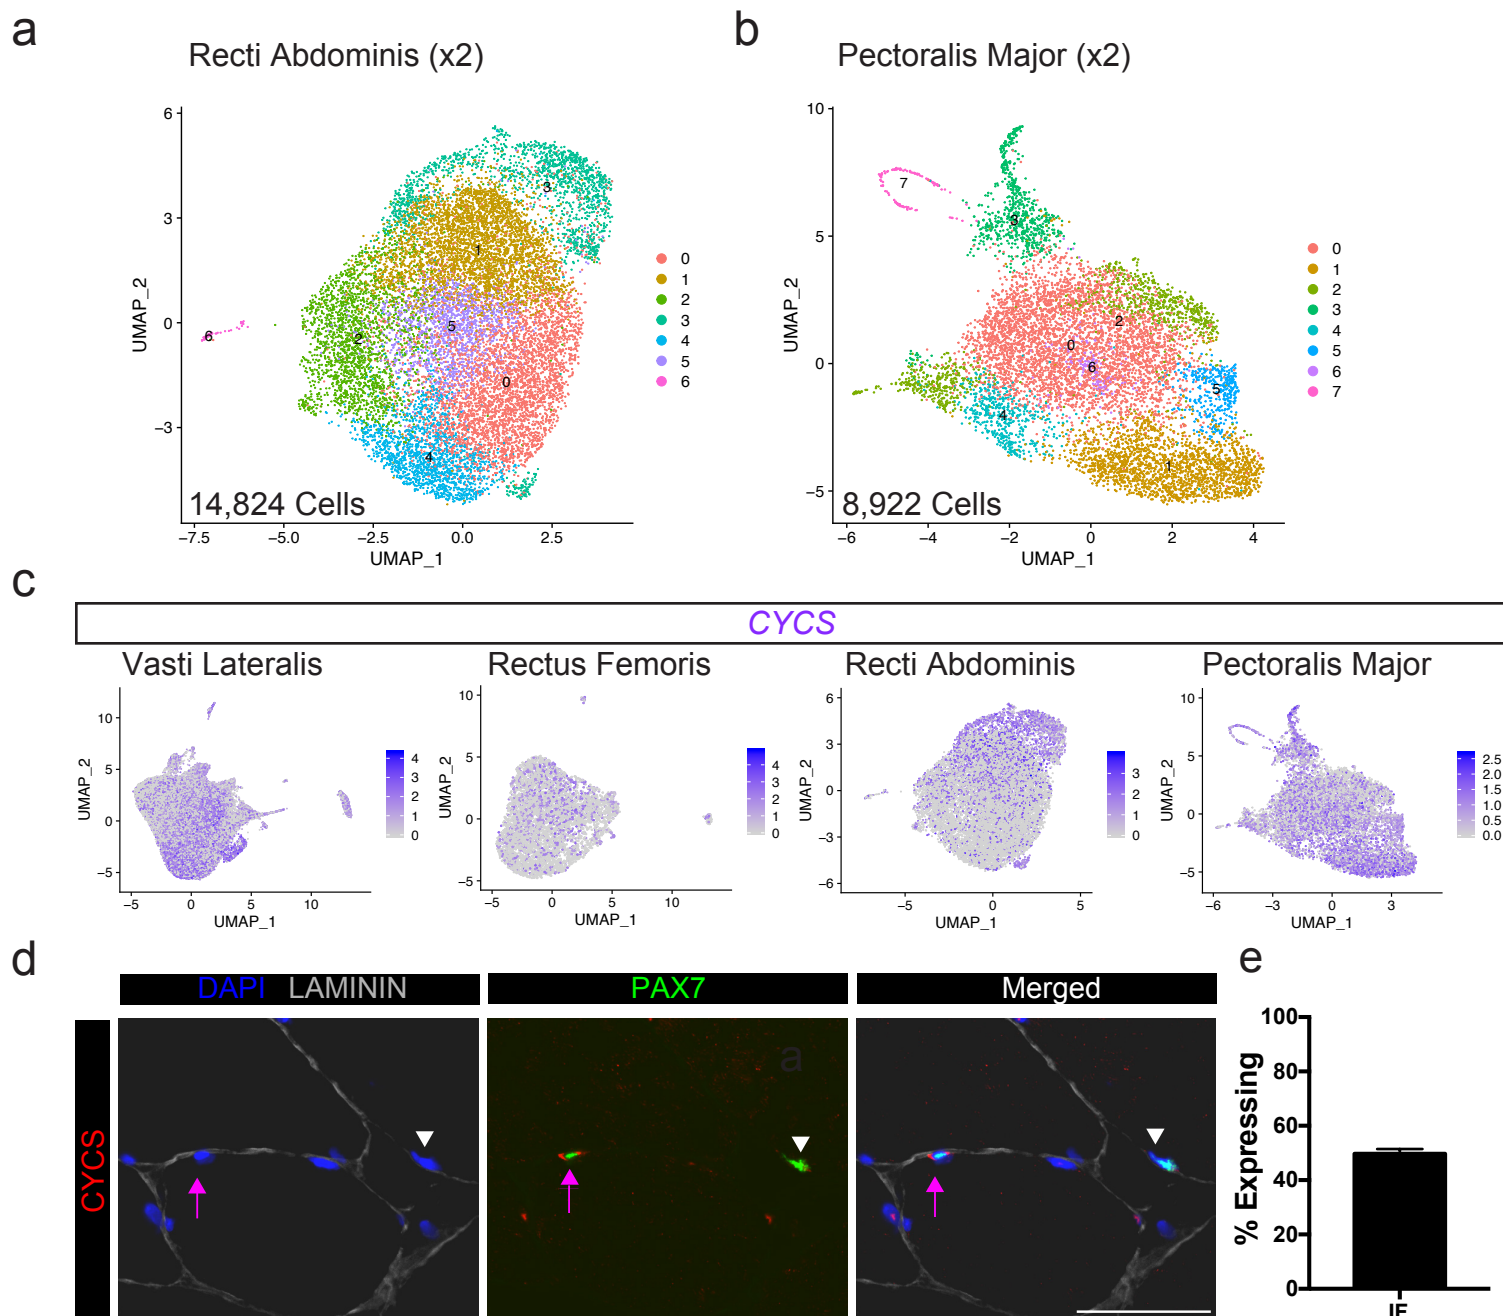

Figure 2-figure supplement 1

Supplement: supp [file elife_poa_e51576_Figure_2_figure_supplement_1.pdf › elife_poa_e51576_Figure_2_figure_supplement_1.pdf]

**a**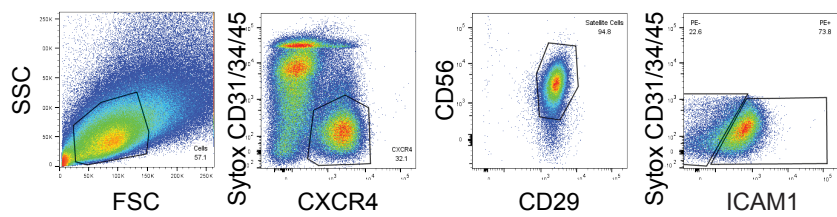**b**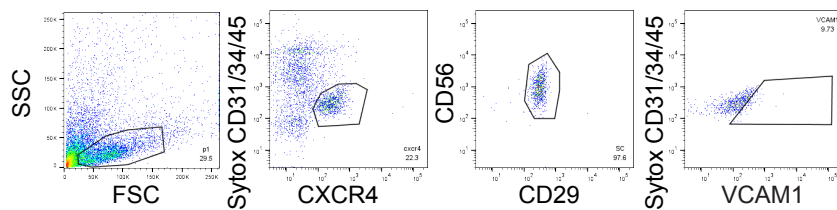**c**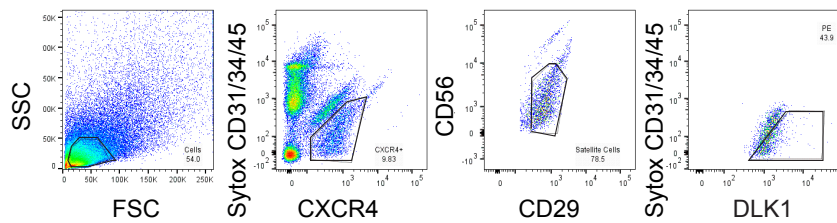**d**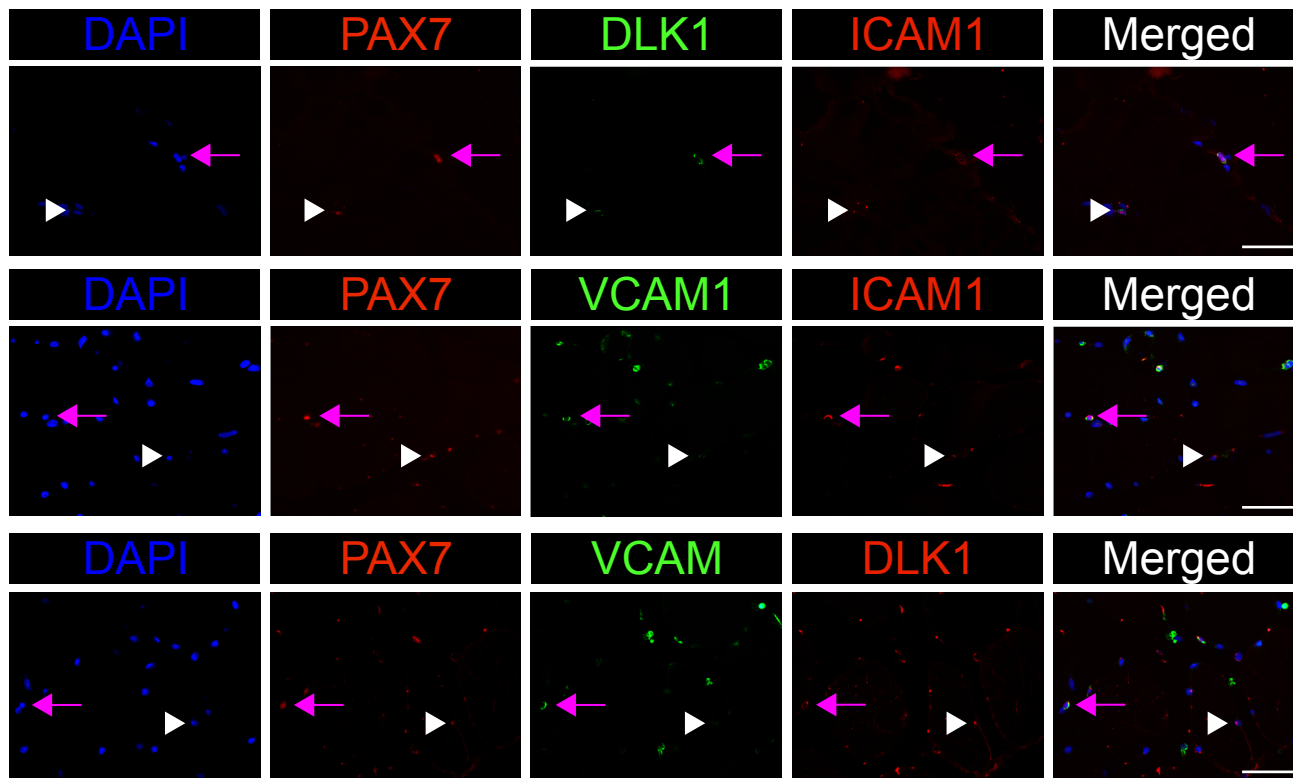**e**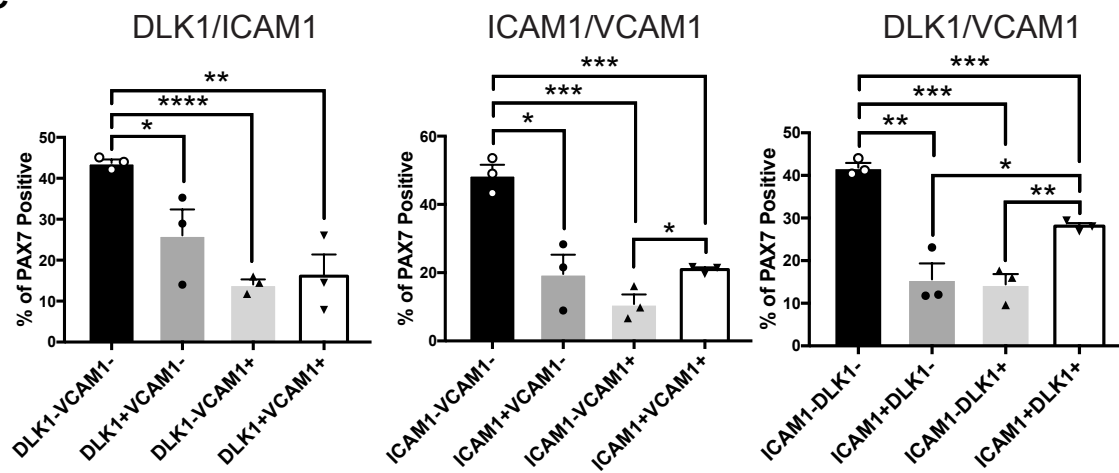**Figure 2-figure supplement 2**

Supplement: supp [file elife_poa_e51576_Figure_2_figure_supplement_2.pdf › elife_poa_e51576_Figure_2_figure_supplement_2.pdf]

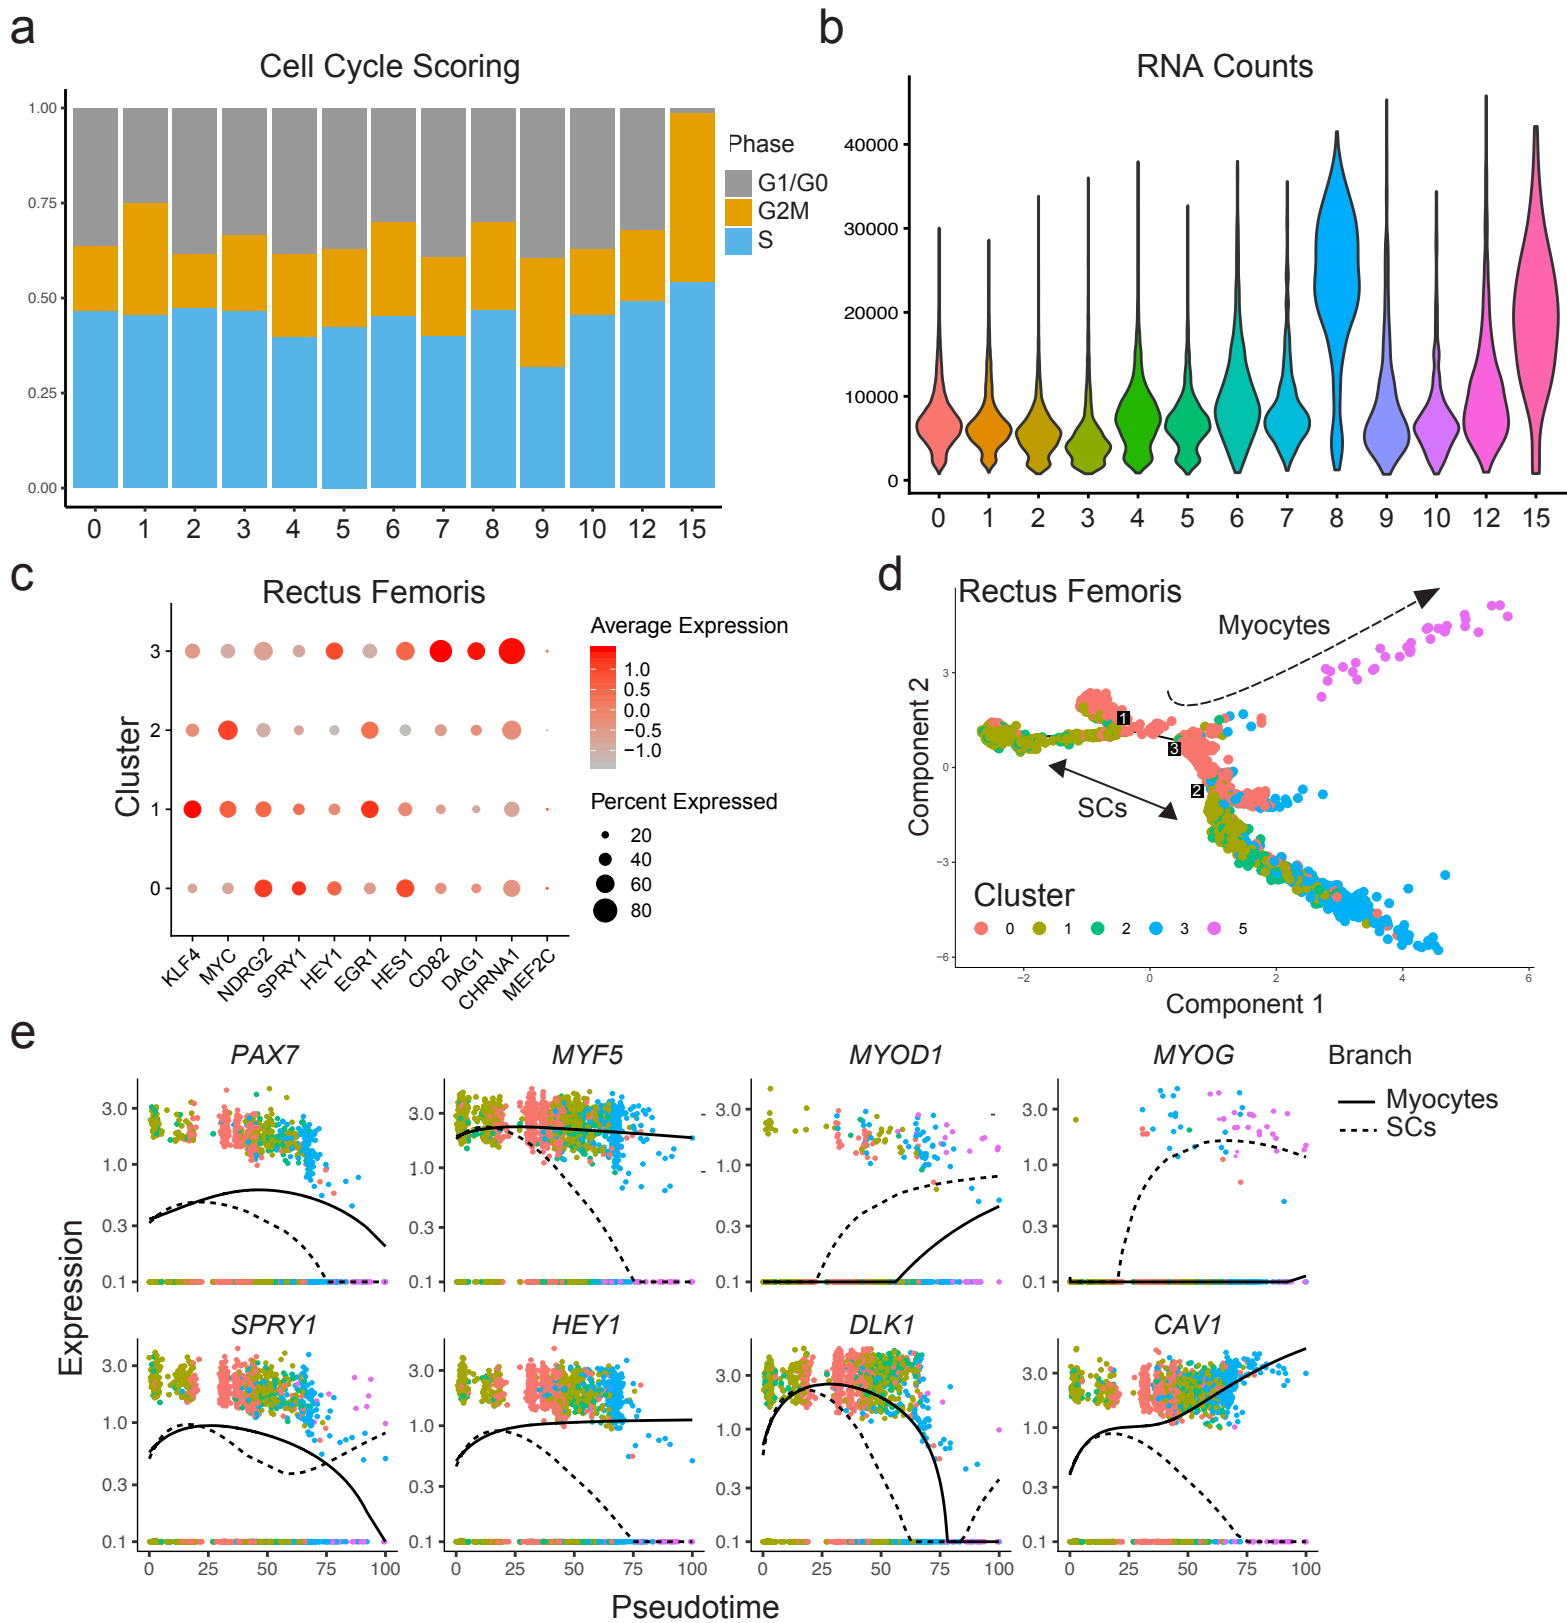

Figure 3-figure supplement 1

Supplement: supp [file elife_poa_e51576_Figure_3_figure_supplement_1.pdf › elife_poa_e51576_Figure_3_figure_supplement_1.pdf]

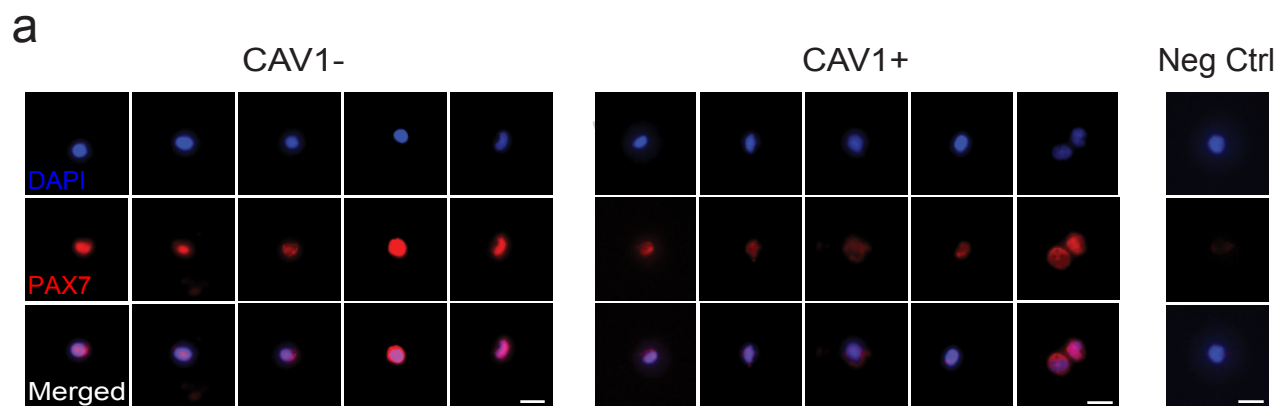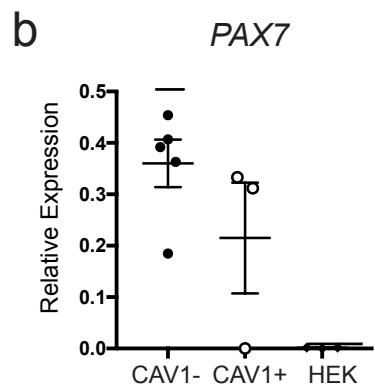

Supplement: supp [file elife_poa_e51576_Figure_5_figure_supplement_1.pdf › elife_poa_e51576_Figure_5_figure_supplement_1.pdf]
